# Supplementary material for: Visible light sensing of ions by a cyanoquinoxaline 1,4-dioxide-based probe and its applications
Source: Royal Society of Chemistry journal article supplement (doi:10.1039/d2dt04143j), 2023-01-01

## Visible light sensing of ions by a cyanoquinoxaline 1,4-dioxide-based probe and its applications

Savita\*, Adinarayana Nandikolla\*, Adarash Kumar Shukla, Kondapalli Venkata Gowri Chandra Sekhar and Anupam Bhattacharya

Department of Chemistry, Birla Institute of Technology and Science-Pilani (Hyderabad Campus), Hyderabad-500078, India.

E-mail: [anupam@hyderabad.bits-pilani.ac.in](mailto:anupam@hyderabad.bits-pilani.ac.in); Tel: +91-40-66303522.

### Supporting Information

| S.No. | Content                                                                                                                                                                                          | Page |
|-------|--------------------------------------------------------------------------------------------------------------------------------------------------------------------------------------------------|------|
| 1.    | Procedure for the synthesis of ACQ/AMQ                                                                                                                                                           | 5    |
| 1.    | <b>Fig. S1(a)</b> <sup>1</sup> H NMR spectrum of ACQ                                                                                                                                             | 6    |
| 2.    | <b>Fig. S1(b)</b> <sup>13</sup> C NMR spectrum of ACQ                                                                                                                                            | 6    |
| 3.    | <b>Fig. S2(a)</b> <sup>1</sup> H NMR spectrum of AMQ                                                                                                                                             | 7    |
| 4.    | <b>Fig. S2(b)</b> <sup>13</sup> C NMR spectrum of AMQ                                                                                                                                            | 7    |
| 5.    | <b>Table. S1</b> Relative Quantum yield calculation in different solvents                                                                                                                        | 8    |
| 6.    | <b>Fig. S3.</b> Photographs under 234 nm and 365 nm for ACQ in different solvents (10 μM)                                                                                                        | 8    |
| 7.    | <b>Fig S4.</b> Absorbance versus Concentration plot obtained by varying concentration of ACQ from 10 μM – 50 μM. From the value of slope $\epsilon = 7602.79 \text{ L mol}^{-1} \text{ cm}^{-1}$ | 9    |
| 8.    | <b>Table S2.</b> Salts used for screening anions against ACQ alongside the solvents and concentration, for preparing stock solutions.                                                            | 9    |
| 9.    | <b>Table S3.</b> Salts used for screening cations against ACQ alongside the solvents and concentration, for preparing stock solutions.                                                           | 10   |
| 10.   | <b>Fig. S5.</b> Bar graph (at 527 nm) of ACQ (50μM) in the presence of various cations (1mM) in H <sub>2</sub> O.                                                                                | 11   |
| 11.   | <b>Fig. S6.</b> Bar graph (at 577 nm) of ACQ (50μM) in the presence of various anions (1mM) in H <sub>2</sub> O.                                                                                 | 11   |
| 12.   | <b>Fig. S7.</b> UV–vis spectra of ACQ (50 μM) in the presence of various competing cations (1 mM) in the presence of Cu <sup>2+</sup> (50 μM)                                                    | 12   |
| 13.   | <b>Fig. S8.</b> Intensity of ACQ (50 μM) in the presence of various competing cations (1 mM) in the presence of Cu <sup>2+</sup> (50 μM)                                                         | 12   |
| 14.   | <b>Fig. S9</b> UV–vis spectra of ACQ (50 μM) in the presence of various competing cations (1 mM) in the presence of Pd <sup>2+</sup> (200 μM)                                                    | 13   |
| 15.   | <b>Fig. S10</b> Intensity of ACQ (50 μM) in the presence of various competing cations (1 mM) in the presence of Pd <sup>2+</sup> (200 μM)                                                        | 13   |
| 16.   | <b>Fig. S11</b> Bar graph (at 656nm) of ACQ (10μM) in the presence of various anions (50μM) in DMSO.                                                                                             | 14   |

|     |                                                                                                                                                                                                                                                               |    |
|-----|---------------------------------------------------------------------------------------------------------------------------------------------------------------------------------------------------------------------------------------------------------------|----|
| 17. | <b>Fig. S12.</b> Bar graph (at 598 nm) of ACQ (10 $\mu$ M) in the presence of various anions (50 $\mu$ M) in DMSO. [Side entrance slit: 1.5 nm bandpass; side exit slit: 1.5 nm bandpass]                                                                     | 14 |
| 18. | <b>Fig. S13</b> UV–vis spectra of ACQ (10 $\mu$ M) in the presence of various competing anions (50 $\mu$ M) in the presence of F <sup>-</sup> (50 $\mu$ M)                                                                                                    | 15 |
| 19. | <b>Fig. S14</b> Intensity of ACQ (10 $\mu$ M) in the presence of various competing anions (50 $\mu$ M) in the presence of F <sup>-</sup> (50 $\mu$ M).                                                                                                        | 15 |
| 20. | <b>Fig. S15</b> Absorbance variation value at 527 nm versus Cu <sup>2+</sup> mole fraction, and the maximum value of absorbance was obtained at a mole fraction of 0.3, indicating a 1:2 (a:l) stoichiometry for the complex between Cu <sup>2+</sup> and ACQ | 16 |
| 21. | <b>Fig. S16</b> Absorbance variation value at 527 nm versus Pd <sup>2+</sup> mole fraction and the maximum value of absorbance was obtained at a mole fraction of 0.3, indicating a 1:2 (a:l) stoichiometry for the complex between Pd <sup>2+</sup> and ACQ  | 17 |
| 22. | <b>Fig. S17</b> Absorbance variation value at 656 nm versus F <sup>-</sup> mole fraction, and the maximum value of absorbance was obtained at a mole fraction of 0.5, indicating a 1:1 (a: l) stoichiometry for the complex between F <sup>-</sup> and ACQ.   | 17 |
| 23. | <b>Fig. S18.</b> Fluorescence emission spectra (at 577 nm) of ACQ (50 $\mu$ M) with the addition of various concentrations of Cu <sup>2+</sup> (0-15 $\mu$ M) in H <sub>2</sub> O respectively                                                                | 18 |
| 24. | <b>Fig. S19.</b> Fluorescence emission spectra of ACQ (10 $\mu$ M) with the addition of various concentrations of Pd <sup>2+</sup> (0-160 $\mu$ M). [Side entrance slit: 3 nm bandpass; side exit slit: 3 nm bandpass]                                        | 18 |
| 25. | <b>Fig. S20.</b> Fluorescence emission spectra of ACQ (10 $\mu$ M) with the addition of various concentrations of F <sup>-</sup> (0-15 $\mu$ M) and (0-35 $\mu$ M) respectively                                                                               | 19 |
| 26. | <b>Fig. S21</b> Benesi–Hildebrand plot from UV-Visible titration data of ACQ (50 $\mu$ M) with Cu <sup>2+</sup> (0-15 $\mu$ M). $K_a=9.9 \times 10^4 \text{ M}^{-2}$                                                                                          | 20 |
| 27. | <b>Fig. S22</b> Benesi–Hildebrand plot from UV-Visible titration data of ACQ (50 $\mu$ M) with Pd <sup>2+</sup> (0-150 $\mu$ M). $K_a=8.7 \times 10^3 \text{ M}^{-2}$                                                                                         | 20 |
| 28. | <b>Fig. S23.</b> Visible color changes of ACQ (50 $\mu$ M) on continuous addition of F <sup>-</sup> ions (0-15 $\mu$ M)                                                                                                                                       | 21 |
| 29. | <b>Fig. S24</b> Benesi–Hildebrand plot from UV-Visible titration data of ACQ (10 $\mu$ M) with F <sup>-</sup> (0-15 $\mu$ M). $K_a=5.8 \times 10^4 \text{ M}^{-1}$                                                                                            | 21 |
| 30. | <b>Fig. S25</b> Benesi–Hildebrand plot from fluorescence titration data of ACQ (50 $\mu$ M) with Cu <sup>2+</sup> (0-15 $\mu$ M). $K_a=3.18 \times 10^4 \text{ M}^{-2}$                                                                                       | 22 |
| 31. | <b>Fig. S26</b> Benesi–Hildebrand plot from fluorescence titration data of ACQ (50 $\mu$ M) with Pd <sup>2+</sup> (0-160 $\mu$ M). $K_a=0.5 \times 10^3 \text{ M}^{-2}$                                                                                       | 22 |
| 32. | <b>Fig. S27</b> Benesi–Hildebrand plot from fluorescence titration data of ACQ (10 $\mu$ M) with F <sup>-</sup> (0-35 $\mu$ M). $K_a=3.8 \times 10^4 \text{ M}^{-1}$                                                                                          | 23 |
| 33. | <b>Fig. S28</b> Plot of Absorbance versus concentration of Cu <sup>2+</sup> at 527 nm and the calculated limit of Detection of ACQ for Cu <sup>2+</sup> is 0.75 $\mu$ M                                                                                       | 23 |
| 34. | <b>Fig.S29</b> Plot of Absorbance versus concentration of Pd <sup>2+</sup> at 527 nm and the calculated limit of Detection of ACQ for Pd <sup>2+</sup> is 7.6 $\mu$ M                                                                                         | 24 |
| 35. | <b>Fig. S30</b> Plot of Absorbance versus concentration of F <sup>-</sup> at 656 nm and the calculated limit of Detection of ACQ for F <sup>-</sup> is 0.53 $\mu$ M                                                                                           | 24 |
| 36. | <b>Fig. S31</b> Plot of Intensity at 577 nm versus concentration of Cu <sup>2+</sup> and the calculated limit of Detection of ACQ for Cu <sup>2+</sup> is 0.25 $\mu$ M                                                                                        | 25 |

|     |                                                                                                                                                                                                                                                              |    |
|-----|--------------------------------------------------------------------------------------------------------------------------------------------------------------------------------------------------------------------------------------------------------------|----|
| 37. | <b>Fig. S32</b> Plot of Intensity versus concentration of Pd <sup>2+</sup> at 577 nm and the calculated limit of Detection of ACQ for Pd <sup>2+</sup> is 11.87 μM                                                                                           | 25 |
| 38. | <b>Fig. S33</b> Plot of Intensity versus concentration of F <sup>-</sup> at 598 nm and the calculated limit of Detection of ACQ for F <sup>-</sup> is 1.15 μM                                                                                                | 26 |
| 39. | <b>Fig. S34</b> Stern-Volmer plot for ACQ against varying concentrations of Cu <sup>2+</sup> in the range of 0-15 μM                                                                                                                                         | 26 |
| 40. | <b>Fig. S35</b> Fractional fluorescence (F <sub>0</sub> /F) versus [Pd <sup>2+</sup> ] plot in the range of 0-180 μM                                                                                                                                         | 27 |
| 41. | <b>Fig. S36</b> Stern-Volmer plot for ACQ against varying concentrations of Pd <sup>2+</sup> in the range of 0-100 μM                                                                                                                                        | 27 |
| 42. | <b>Fig. S37</b> Plot of K <sub>app</sub> versus [Pd] <sup>2+</sup>                                                                                                                                                                                           | 28 |
| 43. | <b>Fig. S38</b> Stern-Volmer plot for ACQ against varying concentrations of F <sup>-</sup> in the range of 0-15 μM                                                                                                                                           | 29 |
| 44. | <b>Fig. S39</b> UV-vis spectra of ACQ (10 μM) in the presence of various anions (50 μM) in H <sub>2</sub> O                                                                                                                                                  | 29 |
| 45. | <b>Fig. S40</b> (a) Absorbance spectra and (b) Emission spectra of ACQ (50 μM) at different pH. (c) Scatter plot of Absorbance vs pH and (d) Intensity Vs pH for ACQ (50 μM) at 477 and 577 nm respectively.                                                 | 30 |
| 46. | <b>Fig. S41</b> (a) Normalized Absorbance spectra and (b) Emission spectra of ACQ (50 μM) + Cu <sup>2+</sup> (20 μM) at different pH                                                                                                                         | 30 |
| 47. | <b>Fig. S42</b> (a) Absorbance spectra and (b) Emission spectra of ACQ (50 μM) + Pd <sup>2+</sup> (100 μM) at different pH                                                                                                                                   | 31 |
| 48. | <b>Fig. S43</b> (a) Absorbance spectra and (b) Emission spectra of ACQ (10 μM) with varying concentrations of AcOH (10-50 μM) in DMSO<br>(c) Absorbance spectra and (b) Emission spectra of ACQ (10 μM) with varying concentrations of KOH (0-10 μM) in DMSO | 31 |
| 49. | <b>Fig. S44</b> Plausible structures of ACQ at different pH and FT-IR Spectrum of (a) ACQ (b) ACQ+Cu <sup>2+</sup> and (c) ACQ+Pd <sup>2+</sup>                                                                                                              | 32 |
| 50. | <b>Fig. S45</b> Particle size histogram of (a) ACQ (b) ACQ+Cu <sup>2+</sup> (c) ACQ+Pd <sup>2+</sup> and FE-SEM images of (d) ACQ (e) ACQ+Cu <sup>2+</sup> (f) ACQ+Pd <sup>2+</sup>                                                                          | 33 |
| 51. | <b>Fig. S46</b> Time decay plot for ACQ and ACQ+Cu <sup>2+</sup>                                                                                                                                                                                             | 34 |
| 52. | <b>Fig. S47</b> Time decay plot for ACQ and ACQ+Pd <sup>2+</sup>                                                                                                                                                                                             | 35 |
| 53. | <b>Fig. S48</b> Time decay plot for ACQ and ACQ+F <sup>-</sup>                                                                                                                                                                                               | 36 |
| 54. | <b>Fig. S49</b> UV-vis spectra depicting reversibility of ACQ with alternative addition of F <sup>-</sup> (656 nm) and AcOH (505 nm).                                                                                                                        | 37 |
| 55. | <b>Fig. S50</b> Absorption spectra in different solvents (10 μM) for AMQ.                                                                                                                                                                                    | 37 |
| 56. | <b>Fig. S51</b> Absorbance spectra of AMQ (10 μM) in the presence of various anions (50 μM) in DMSO.                                                                                                                                                         | 38 |
| 57. | <b>Fig. S52</b> Absorbance spectra of AMQ (50 μM) in the presence of various cations (1 mM) in H <sub>2</sub> O.                                                                                                                                             | 38 |
| 58. | <b>Fig. S53.</b> Plot of Intensity versus wavelength for ACQ (10 μM) in H <sub>2</sub> O at different Excitation wavelengths.                                                                                                                                | 39 |
| 59. | <b>Fig. S54</b> Bar graph for ACQ at 527 nm obtained by titrating 20 μL samples of                                                                                                                                                                           | 40 |

|     |                                                                                                                                                                                                         |       |
|-----|---------------------------------------------------------------------------------------------------------------------------------------------------------------------------------------------------------|-------|
|     | artificial urine with $\text{Cu}^{2+}$ (2-8 $\mu\text{M}$ ) in $\text{H}_2\text{O}$ .                                                                                                                   |       |
| 60. | <b>Fig.S55</b> Absorbance versus $[\text{Cu}^{2+}]$ plot for ACQ at different concentrations (0-10 $\mu\text{M}$ ) of $\text{Cu}^{2+}$ in $\text{H}_2\text{O}$ .                                        | 40    |
| 61. | <b>Fig.S56</b> Intensity versus $[\text{Cu}^{2+}]$ plot for (a) ACQ (b) and 20 $\mu\text{L}$ with different concentrations (0-3 $\mu\text{M}$ ) of $\text{Cu}^{2+}$ at 527 nm in $\text{H}_2\text{O}$ . | 41    |
| 62. | <b>Fig S57.</b> Scatter plots for (a)ACQ with $\text{Pd}^{2+}$ (0-40 $\mu\text{M}$ ) along with (b) Avomine (c) Dolo 650 and (d) Meftal at 527 nm in $\text{H}_2\text{O}$ .                             | 42    |
| 63. | <b>Table S4.</b> Absorbance values at 527 nm for various drug samples.                                                                                                                                  | 42-43 |
| 64. | <b>Fig S58.</b> Absorbance versus $[\text{F}^-]$ plot for ACQ at different concentrations of $\text{F}^-$ in DMSO.                                                                                      | 43    |
| 65. | <b>Fig S59.</b> Bar graph for ACQ at 656 nm obtained by titrating toothpaste samples with $\text{F}^-$ (2-8 $\mu\text{M}$ ) in DMSO.                                                                    | 44    |
| 66. | <b>Table S5.</b> Calculated parameters from the obtained experimental values for quantifying $\text{F}^-$ in different toothpaste samples.                                                              | 44    |
| 67. | <b>Table. S6</b> Examples of previously reported colorimetric and fluorescence-based $\text{Cu}^{2+}$ sensors                                                                                           | 45    |
| 68. | <b>Table S7</b> Examples of previously reported colorimetric and fluorescence-based $\text{Pd}^{2+}$ sensors                                                                                            | 45-46 |
| 69. | <b>Table S8</b> Examples of previously reported colorimetric and fluorescence-based $\text{F}^-$ sensors                                                                                                | 46-47 |
| 70. | <b>Table S9</b> Examples of previously reported molecules with N-oxide group used for fluorescence studies.                                                                                             | 47-48 |
| 71. | <b>References</b>                                                                                                                                                                                       | 49-50 |
| 72. | Single Crystal X-Ray Data of ACQ                                                                                                                                                                        | 51-54 |

## Procedure for the synthesis of ACQ/AMQ

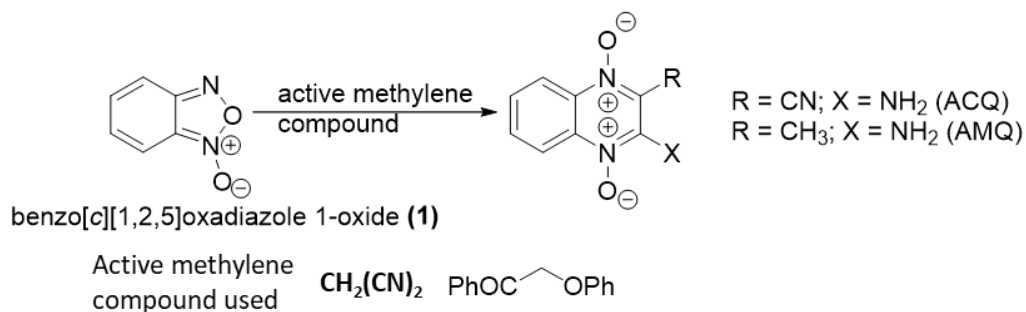

**Preparation of ACQ:** Malononitrile (1.5 equiv.) was added to a stirred solution of compound **1** (100 mg, 0.73 mmol) [ESI] and triethylamine (3.0 equiv.) in DMF (1 ml). The resulting mixture was then left to stir; on completion of the reaction, as indicated by the TLC, the red precipitate formed was filtered. The resulting solid was washed successively with water and ethyl acetate and dried over the vacuum. Mp: 252-253.2 °C (Lit. Mp: 238-240 °C).<sup>[a]</sup> Yield: 90 %. <sup>1</sup>H NMR (400 MHz, DMSO-*d*<sub>6</sub>):  $\delta$  8.31 - 8.29 (t, *J* = 7.6 Hz, 2H), 8.07 (s, 2H), 7.94 - 7.91 (m, 1H), 7.68 - 7.64 (m, 1H). <sup>13</sup>C NMR (101 MHz, DMSO-*d*<sub>6</sub>):  $\delta$  146.3, 137.2, 134.6, 132.1, 128.0, 120.1, 118.4, 111.0, 109.1. HRMS-ESI (+) *m/z*: Calcd for C<sub>9</sub>H<sub>7</sub>N<sub>4</sub>O<sub>2</sub><sup>-</sup> [M+H<sup>+</sup>], 203.0574; found, 203.0538.

**Preparation of AMQ:** 1-Phenoxypropan-2-one (1.1 equiv.) was added to a stirred solution of compound **1** (182 mg, 1.21 mmol) in methanol (5 ml). Ammonia was then purged in the reaction mixture with continuous stirring for 4 hours. On completion of the reaction, as indicated by TLC, the solvent was removed under reduced pressure. The resulting yellow solid was subsequently washed with diethyl ether and dried. Mp: 192-194 °C. Yield: 72.2 %. <sup>1</sup>H NMR (400 MHz, DMSO-*d*<sub>6</sub>):  $\delta$  8.33 (d, *J* = 8 Hz, 1H), 8.235 (d, *J* = 12 Hz, 1H), 7.82(t, *J* = 8Hz, 1H) 7.62 (t, *J* = 8Hz, 1H), 2.55 (s, 3H). <sup>13</sup>C NMR (101 MHz, DMSO-*d*<sub>6</sub>): 144.9, 134.4, 132.8, 132.1, 131.4, 127.4, 119.6, 117.5, 12.9. HRMS-ESI (+) *m/z*: Calcd for C<sub>9</sub>H<sub>10</sub>N<sub>3</sub>O<sub>2</sub><sup>-</sup> [M+H<sup>+</sup>], 192.0779; found, 192.0753.

[a] I. T. Ibrahim and M. A. Wally, *J Radioanal Nucl Chem*, **2010**, 285, 169–175.

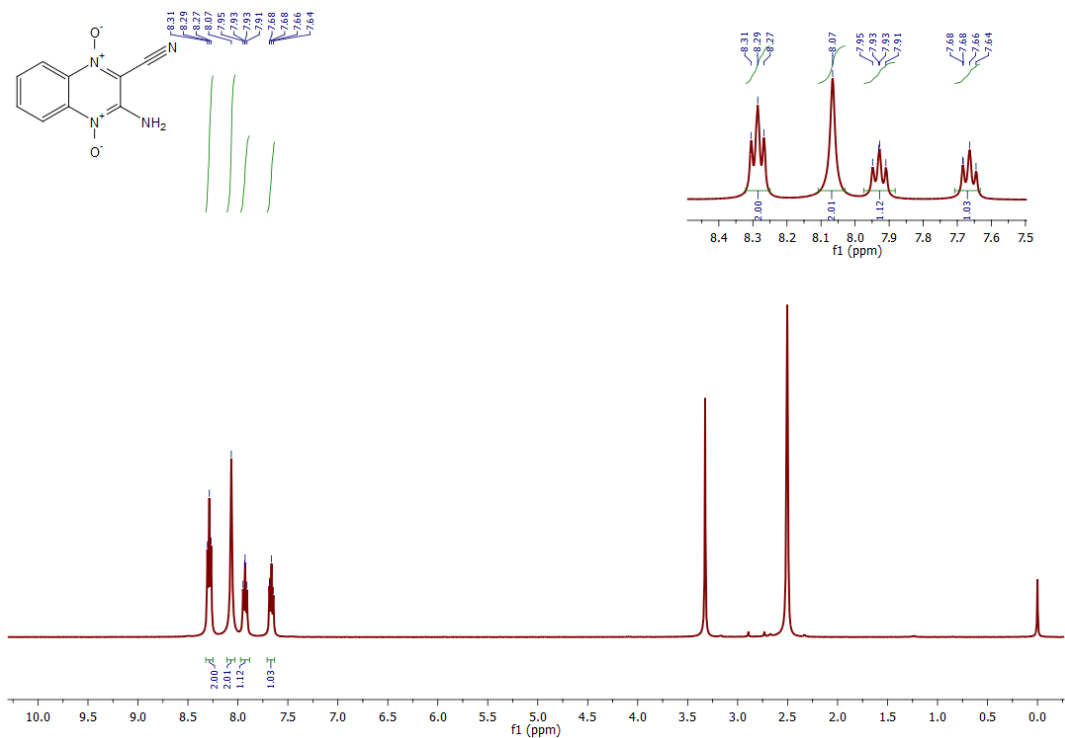

**Fig. S1(a)**  $^1\text{H}$  NMR spectrum of ACQ

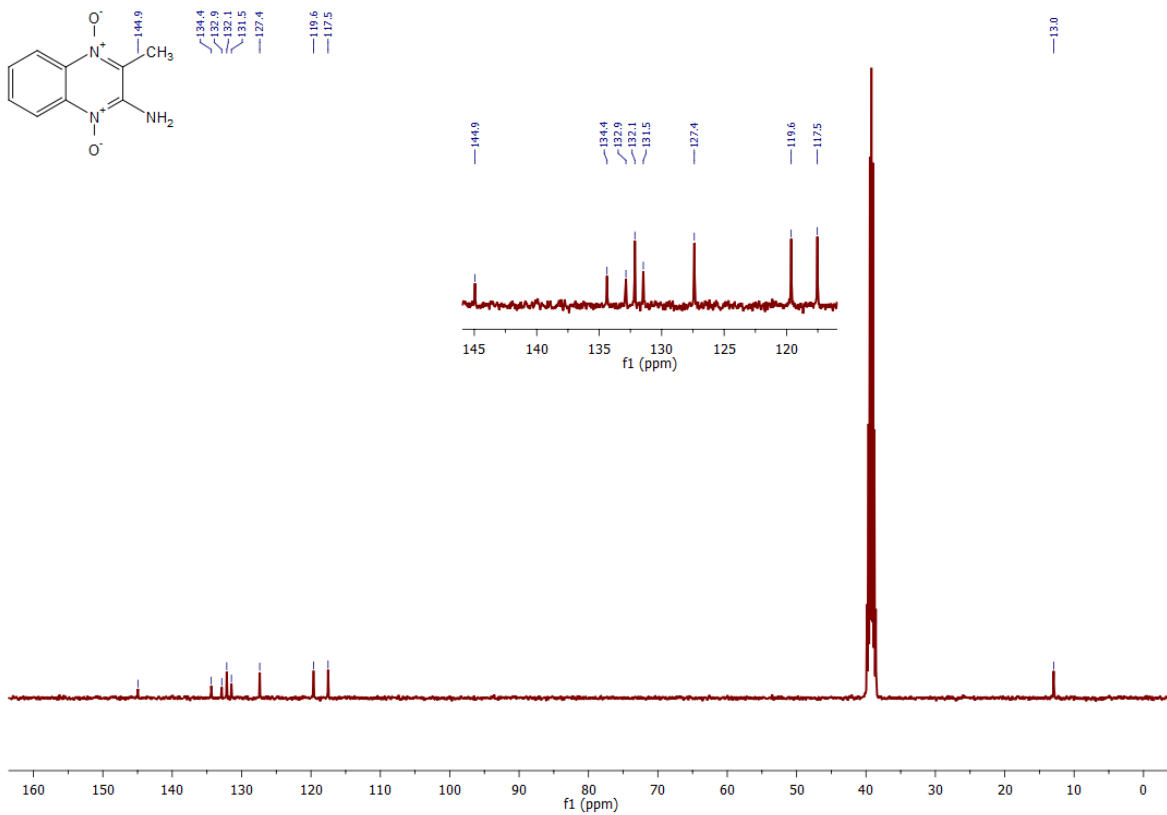

**Fig. S1(b)**  $^{13}\text{C}$  NMR spectrum of ACQ

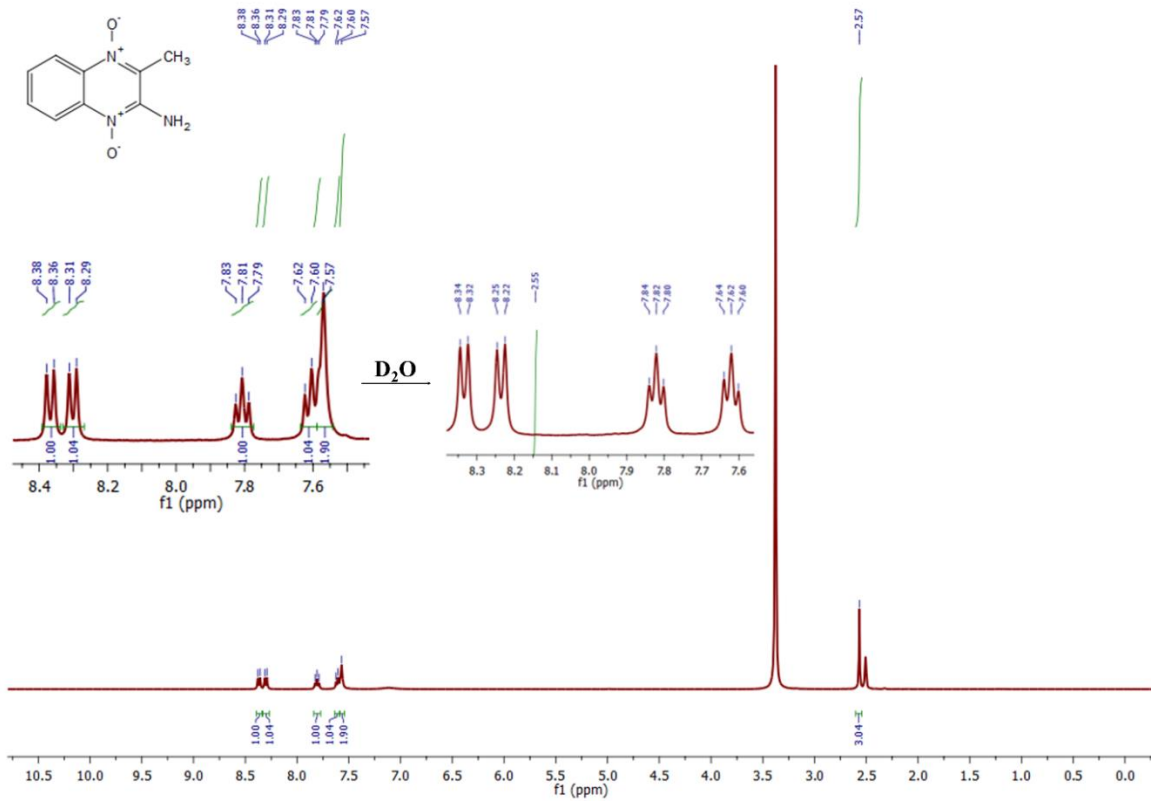

**Fig. S2(a)** <sup>1</sup>H NMR spectrum of AMQ

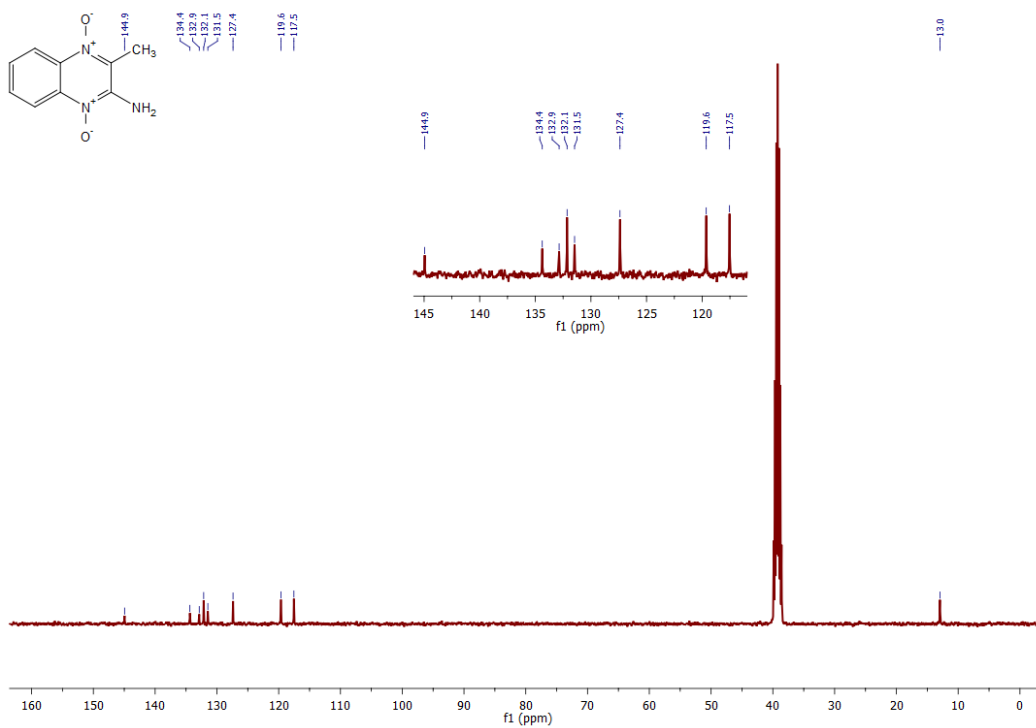

**Fig. S2(b)** <sup>13</sup>C NMR spectrum of AMQ

**Table. S1** Relative Quantum yield calculation in different solvents

| SOLVENT          | Dielectric constant ( $\epsilon$ ) | ACQ $\lambda_{\text{abs}}$ (nm) | ACQ $\lambda_{\text{em}}$ (nm) | Stokes shift (nm) | $R_D$  | $\phi_F$ |
|------------------|------------------------------------|---------------------------------|--------------------------------|-------------------|--------|----------|
| Dioxane          | 2.3                                | 497                             | 574                            | 77                | 1.422  | 0.176    |
| Toluene          | 2.4                                | 499                             | 570                            | 71                | 1.4969 | 0.5206   |
| THF              | 7.5                                | 507                             | 573                            | 66                | 1.407  | 0.8104   |
| DCM              | 9.1                                | 492                             | 566                            | 74                | 1.424  | 0.345    |
| DMF              | 37                                 | 506                             | 586                            | 80                | 1.430  | 0.123    |
| ACN              | 38                                 | 498                             | 563                            | 65                | 1.3441 | 0.238    |
| DMSO             | 46.68                              | 505                             | 598                            | 93                | 1.4793 | 0.4869   |
| H <sub>2</sub> O | 80                                 | 470                             | 577                            | 107               | 1.333  | 0.0082   |

The following equation was used for calculating quantum yield,

$$\Phi_S = \frac{\text{Abs}_R}{\text{Abs}_S} \times \frac{\text{Area}_S}{\text{Area}_R} \times \frac{n_S}{n_R} \times \Phi_R$$

where subscripts S and R refer to the samples and reference respectively. Abs, Area and n are the absorbance at the excitation wavelength, area under the fluorescence spectrum and refractive index of the solvent respectively.

Rhodamine 6G was used as the reference for calculating quantum yield.

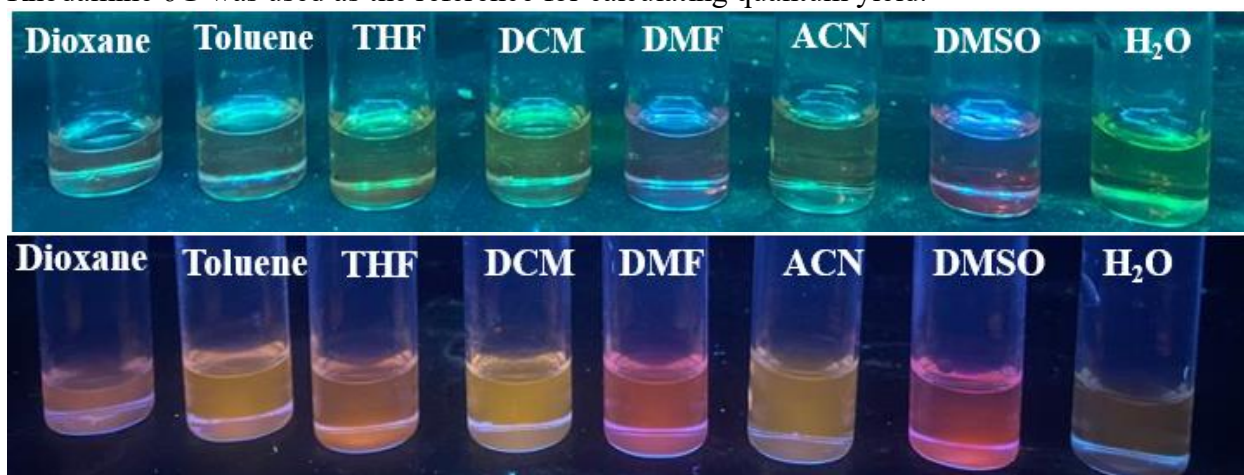**Fig. S3.** Photographs under 234 nm and 365 nm for ACQ in different solvents (10  $\mu\text{M}$ )



### Calculation of Molar Absorptivity of ACQ

According to Beer-Lambert's Law  $A = \epsilon Cl$

- A= Absorbance
- C= Molar Concentration ( $\text{mol L}^{-1}$ )
- L=Optical path length (cm)

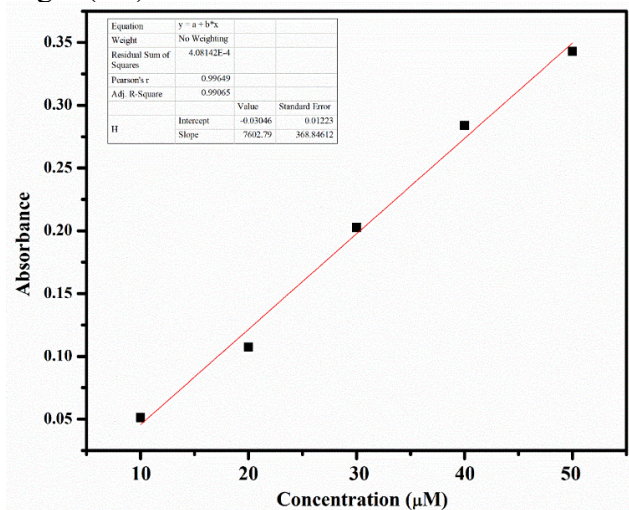

**Fig S4.** Absorbance versus Concentration plot obtained by varying concentration of ACQ in DMSO from 10  $\mu\text{M}$  – 50  $\mu\text{M}$ . From the value of slope  $\epsilon = 7602.79 \text{ L mol}^{-1} \text{ cm}^{-1}$

**Table S2.** Salts used for screening anions against ACQ alongside the solvents and concentration, for preparing stock solutions.

| S.No. | Anion                     | Salt                                                                   | Solvent              | Concentration |
|-------|---------------------------|------------------------------------------------------------------------|----------------------|---------------|
| 1.    | $\text{F}^-$              | Tetrabutylammonium fluoride (TBAF)                                     | DMSO                 | 0.01 M        |
| 2.    | $\text{Cl}^-$             | Tetrabutylammonium chloride (TBACl)                                    | DMSO                 | 0.01 M        |
| 3.    | $\text{Br}^-$             | Tetrabutylammonium bromide (TBAB)                                      | DMSO                 | 0.01 M        |
| 4.    | $\text{I}^-$              | Tetrabutylammonium Iodide (TBAI)                                       | DMSO                 | 0.01 M        |
| 5.    | $\text{OAc}^-$            | Tetrabutylammonium acetate (TBAOAc)                                    | DMSO                 | 0.01 M        |
| 6.    | $\text{H}_2\text{PO}_4^-$ | Tetrabutylammonium dihydrogen phosphate ( $\text{TBAH}_2\text{PO}_4$ ) | DMSO                 | 0.01 M        |
| 7.    | $\text{HSO}_4^-$          | Tetrabutylammonium hydrogensulfate ( $\text{TBAHSO}_4$ )               | DMSO                 | 0.01 M        |
| 8.    | $\text{HPO}_4^{2-}$       | Disodium hydrogen phosphate ( $\text{Na}_2\text{HPO}_4$ )              | DMSO                 | 0.01 M        |
| 9.    | $\text{SCN}^-$            | Ammonium thiocyanate ( $\text{NH}_4\text{SCN}$ )                       | $\text{H}_2\text{O}$ | 0.01 M        |
| 10.   | $\text{N}_3^-$            | Sodium azide ( $\text{NaN}_3$ )                                        | $\text{H}_2\text{O}$ | 0.01 M        |

**Table S3.** Salts used for screening cations against ACQ alongside the solvents and concentration, for preparing stock solutions.

| S.No. | Cation           | Salt                                                                                                        | Solvent                         | Concentration |
|-------|------------------|-------------------------------------------------------------------------------------------------------------|---------------------------------|---------------|
| 1.    | Ag <sup>+</sup>  | Silver nitrate (AgNO <sub>3</sub> )                                                                         | H <sub>2</sub> O                | 1M            |
| 2.    | Au <sup>3+</sup> | Gold (III) chloride trihydrate<br>(HAuCl <sub>4</sub> · 3H <sub>2</sub> O)                                  | H <sub>2</sub> O                | 0.01 M        |
| 3.    | Al <sup>3+</sup> | Aluminum sulfate octa decahydrate<br>(Al <sub>2</sub> (SO <sub>4</sub> ) <sub>3</sub> · 18H <sub>2</sub> O) | H <sub>2</sub> O                | 0.01 M        |
| 4.    | Ba <sup>2+</sup> | Dichlorobarium dihydrate<br>(BaCl <sub>2</sub> · 2H <sub>2</sub> O)                                         | H <sub>2</sub> O                | 1M            |
| 5.    | Ca <sup>2+</sup> | Calcium chloride (CaCl <sub>2</sub> )                                                                       | H <sub>2</sub> O                | 1M            |
| 6.    | Cd <sup>2+</sup> | Cadmium chloride (CdCl <sub>2</sub> )                                                                       | H <sub>2</sub> O                | 1M            |
| 7.    | Co <sup>2+</sup> | Cobalt chloride (CoCl <sub>2</sub> )                                                                        | H <sub>2</sub> O                | 1M            |
| 8.    | Cu <sup>+</sup>  | Copper bromide (CuBr)                                                                                       | ACN                             | 1M            |
| 9.    | Cu <sup>2+</sup> | Copper sulfate pentahydrate<br>(CuSO <sub>4</sub> · 5H <sub>2</sub> O)                                      | H <sub>2</sub> O                | 1M            |
| 10.   | Fe <sup>2+</sup> | Iron (II) chloride tetrahydrate<br>(FeCl <sub>2</sub> · 4H <sub>2</sub> O)                                  | H <sub>2</sub> O                | 0.01 M        |
| 11.   | Fe <sup>3+</sup> | Ferric chloride (FeCl <sub>3</sub> )                                                                        | EtOH                            | 0.01 M        |
| 12.   | Hg <sup>2+</sup> | Mercury (II) chloride (HgCl <sub>2</sub> )                                                                  | H <sub>2</sub> O: EtOH<br>(1:1) | 0.01 M        |
| 13.   | K <sup>+</sup>   | Potassium chloride (KCl)                                                                                    | H <sub>2</sub> O                | 1M            |
| 14.   | Mg <sup>2+</sup> | Magnesium dichloride hexahydrate<br>(MgCl <sub>2</sub> .6H <sub>2</sub> O)                                  | H <sub>2</sub> O                | 1M            |
| 15.   | Mn <sup>2+</sup> | Manganese (II) Chloride Dihydrate<br>(MnCl <sub>2</sub> .2H <sub>2</sub> O)                                 | H <sub>2</sub> O                | 1M            |
| 16.   | Na <sup>+</sup>  | Sodium Chloride (NaCl)                                                                                      | H <sub>2</sub> O                | 1M            |
| 17.   | Ni <sup>2+</sup> | Nickel (II) chloride hexahydrate<br>(NiCl <sub>2</sub> .6H <sub>2</sub> O)                                  | H <sub>2</sub> O                | 1M            |
| 18.   | Pb <sup>2+</sup> | Lead (II) nitrate (Pb(NO <sub>3</sub> ) <sub>2</sub> )                                                      | H <sub>2</sub> O                | 1M            |
| 19.   | Pd <sup>2+</sup> | Palladium (II) acetate (Pd(ac) <sub>2</sub> )                                                               | ACN                             | 0.01 M        |
| 20.   | Pt <sup>4+</sup> | Chloroplatinic acid hexahydrate<br>(H <sub>2</sub> PtCl <sub>6</sub> · 6H <sub>2</sub> O)                   | H <sub>2</sub> O                | 0.01 M        |
| 21.   | Sn <sup>2+</sup> | Stannous chloride dihydrate<br>(SnCl <sub>2</sub> .2H <sub>2</sub> O)                                       | H <sub>2</sub> O                | 0.01 M        |
| 22.   | V <sup>3+</sup>  | Vanadium (III) Chloride (VCl <sub>3</sub> )                                                                 | H <sub>2</sub> O                | 0.01 M        |
| 23.   | Zn <sup>2+</sup> | Zinc acetate (Zn(ac) <sub>2</sub> )                                                                         | H <sub>2</sub> O                | 1M            |

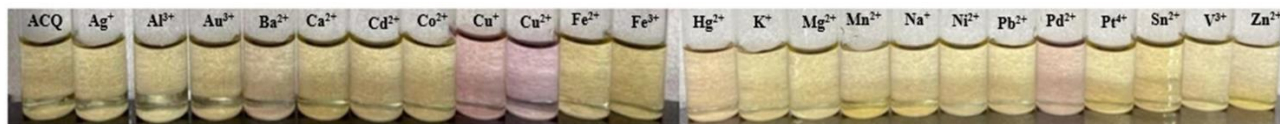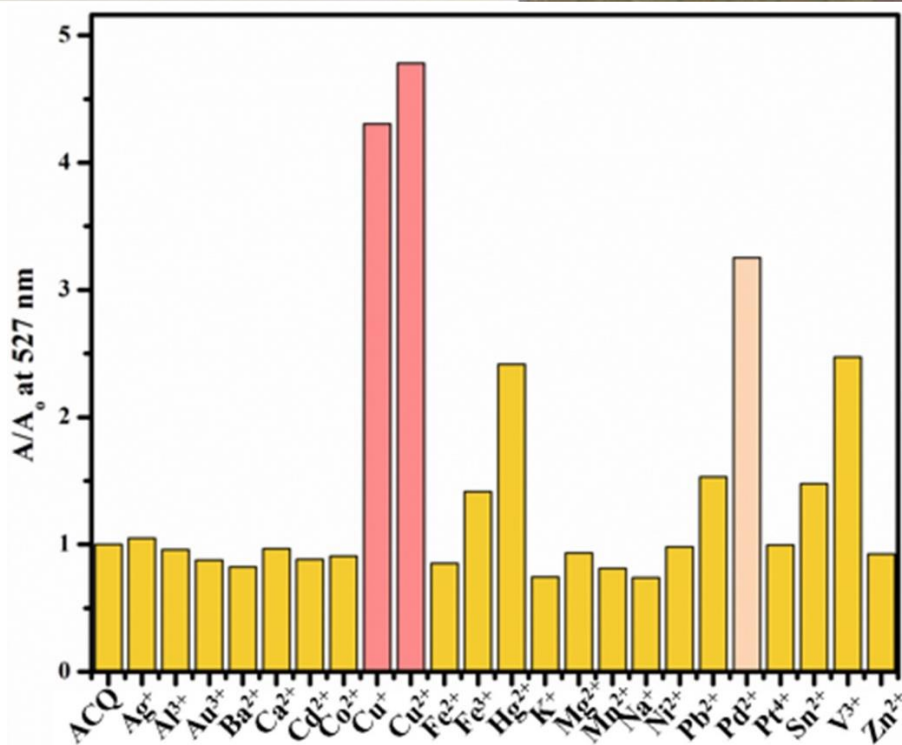

**Fig. S5.** Bar graph (at 527 nm) of ACQ (50 $\mu$ M) in the presence of various cations (1mM) in H<sub>2</sub>O.

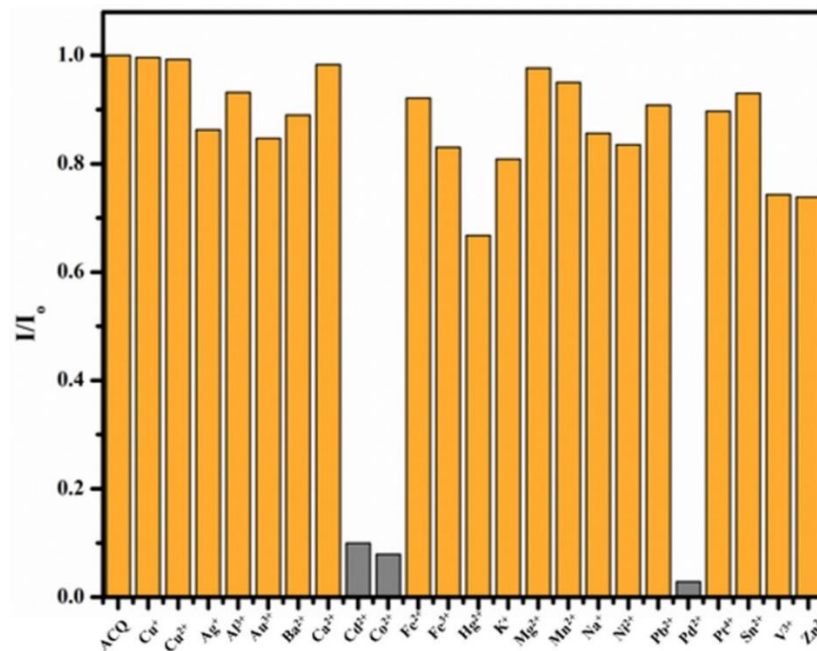

**Fig. S6.** Bar graph (at 577 nm) of ACQ (50 $\mu$ M) in the presence of various anions (1mM) in H<sub>2</sub>O.

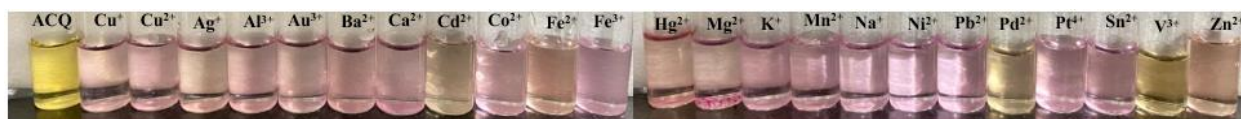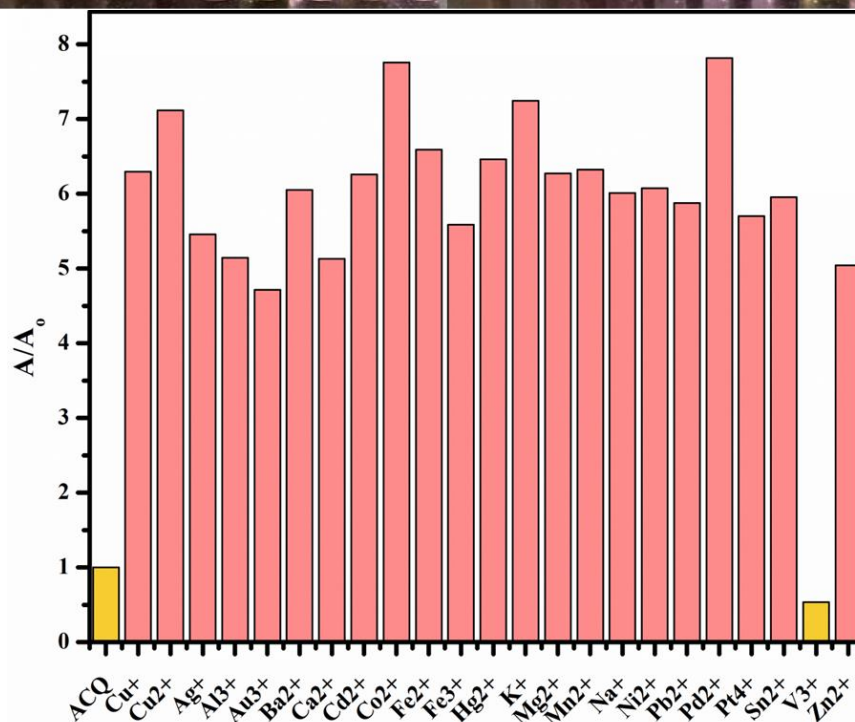

**Fig. S7.** UV-vis spectra of ACQ (50  $\mu\text{M}$ ) in the presence of various competing cations (1 mM) in the presence of  $\text{Cu}^{2+}$  (50  $\mu\text{M}$ )

- **Interfering Cation:  $\text{V}^{3+}$**

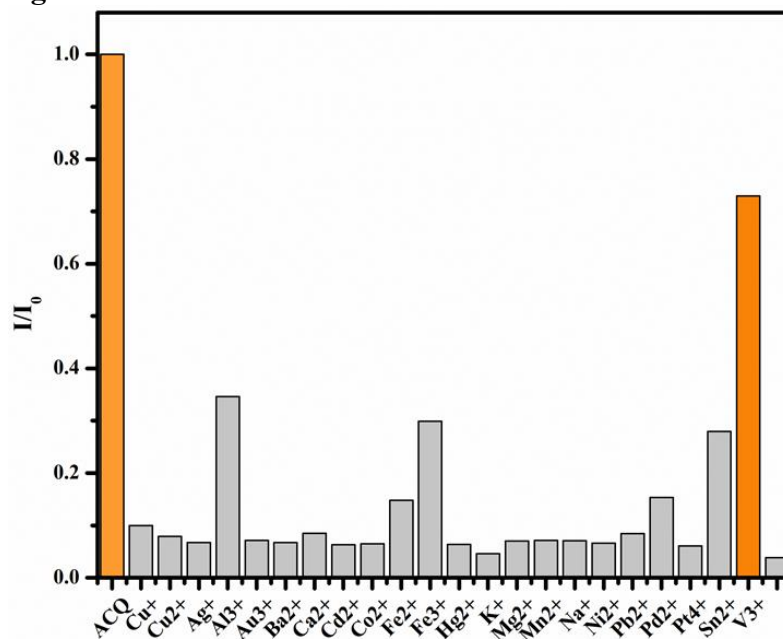

**Fig. S8.** Intensity of ACQ (50  $\mu\text{M}$ ) in the presence of various competing cations (1 mM) in the presence of  $\text{Cu}^{2+}$  (50  $\mu\text{M}$ )

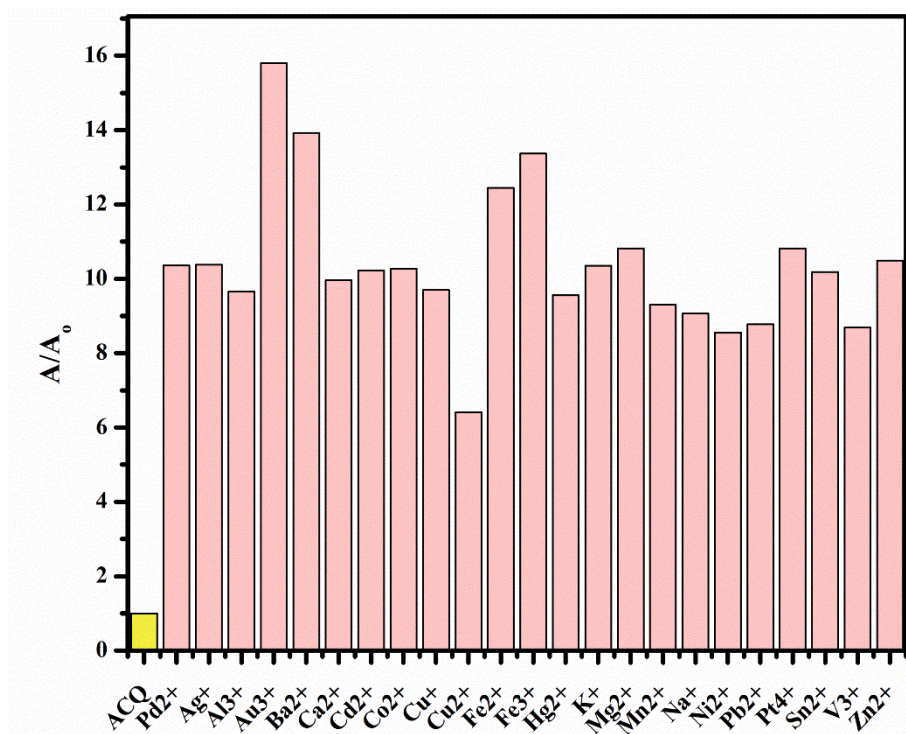

**Fig. S9** UV-vis spectra of ACQ (50  $\mu\text{M}$ ) in the presence of various competing cations (1 mM) in the presence of  $\text{Pd}^{2+}$  (200  $\mu\text{M}$ )

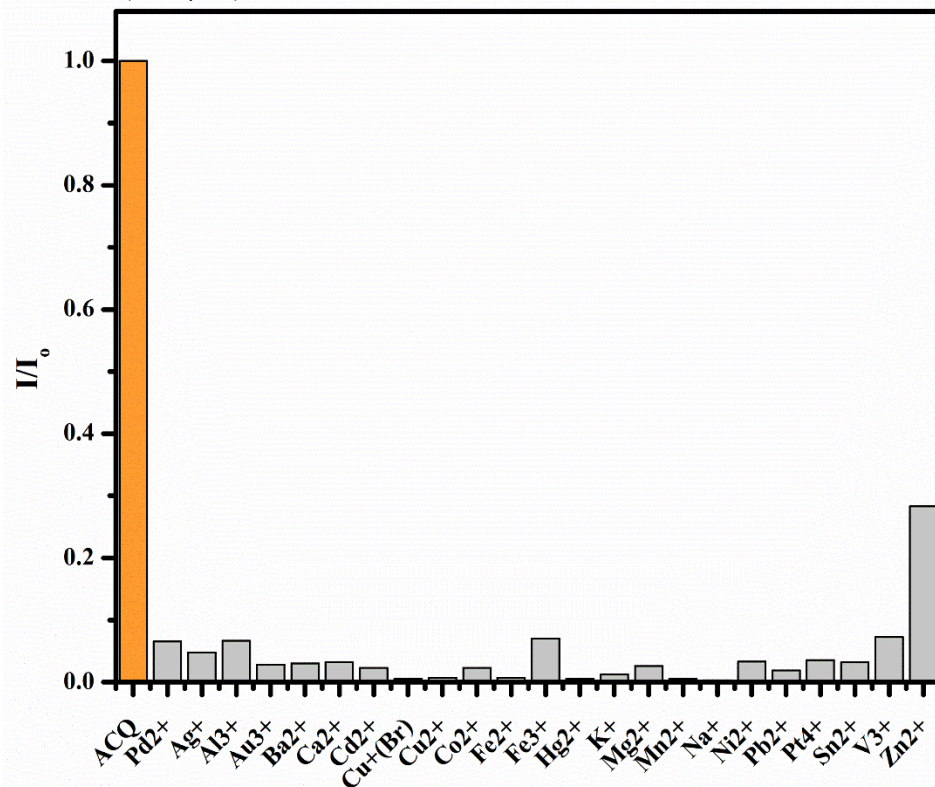

**Fig. S10** Intensity of ACQ (50  $\mu\text{M}$ ) in the presence of various competing cations (1 mM) in the presence of  $\text{Pd}^{2+}$  (200  $\mu\text{M}$ )

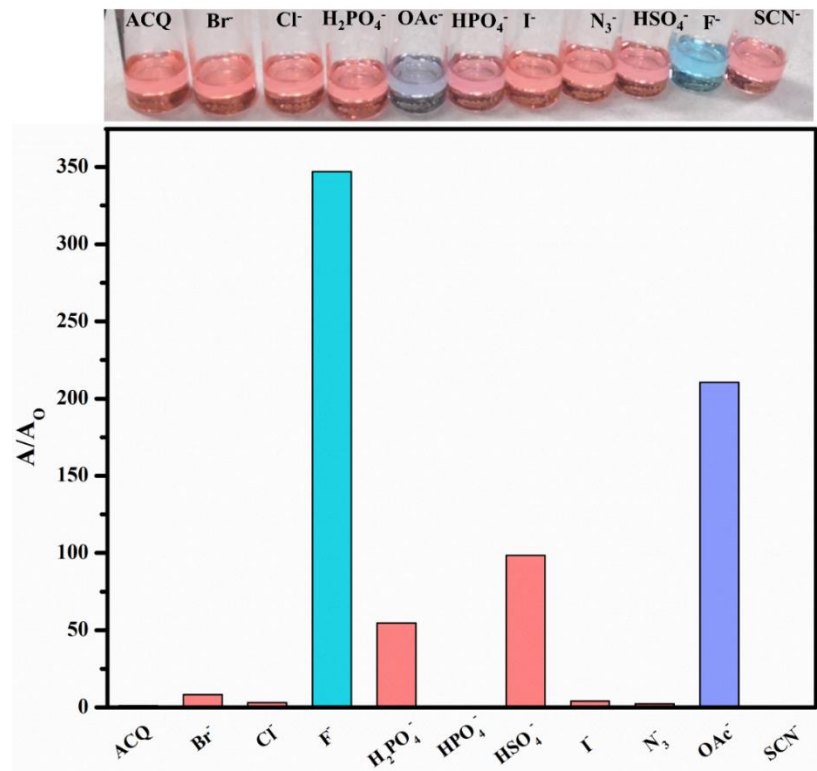

**Fig. S11** Bar graph (at 656nm) of ACQ (10 $\mu$ M) in the presence of various anions (50 $\mu$ M) in DMSO.

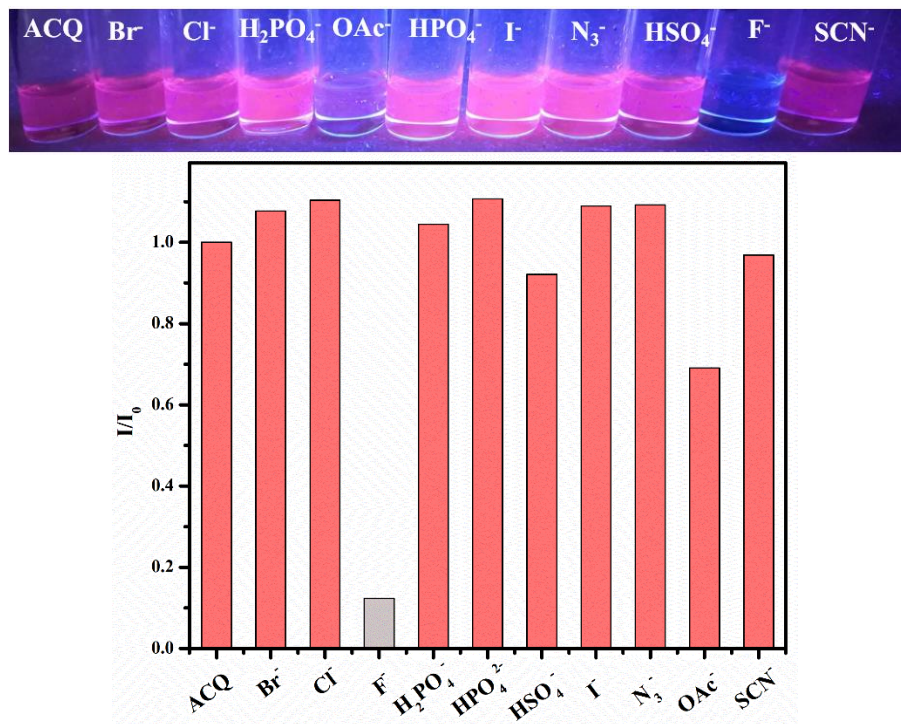

**Fig. S12.** Bar graph (at 598 nm) of ACQ (10 $\mu$ M) in the presence of various anions (50 $\mu$ M) in DMSO. [Side entrance slit: 1.5 nm bandpass; side exit slit: 1.5 nm bandpass]

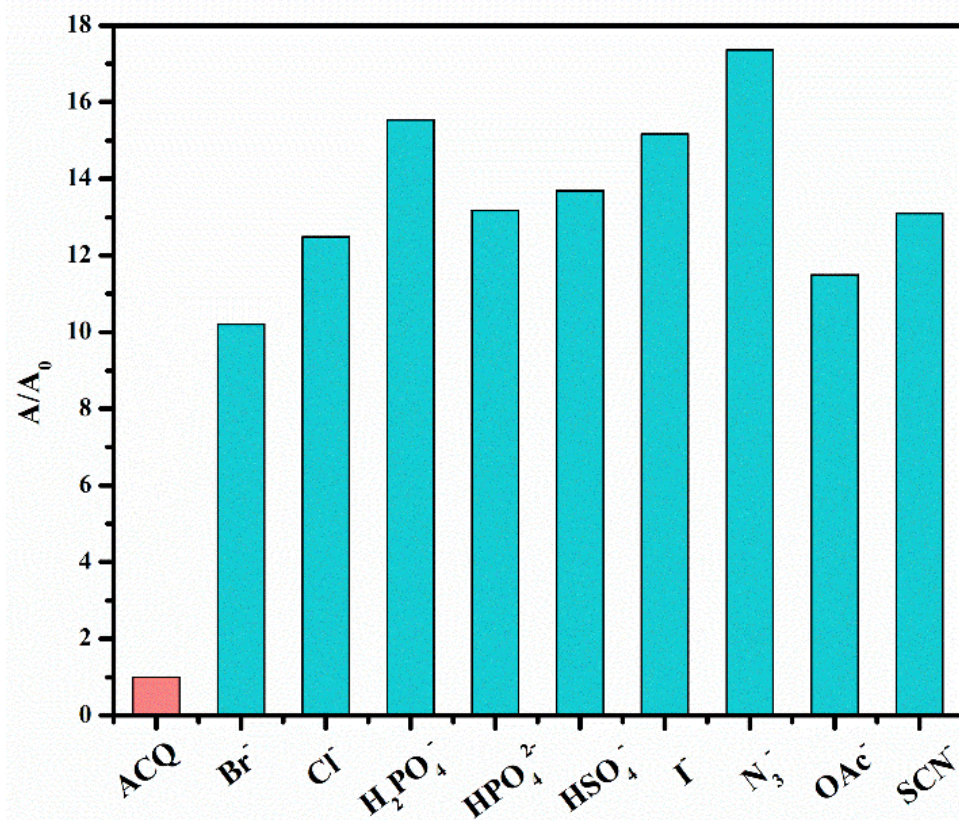

**Fig. S13** UV-vis spectra of ACQ (10  $\mu\text{M}$ ) in the presence of various competing anions (50  $\mu\text{M}$ ) in the presence of  $\text{F}^-$  (50  $\mu\text{M}$ )

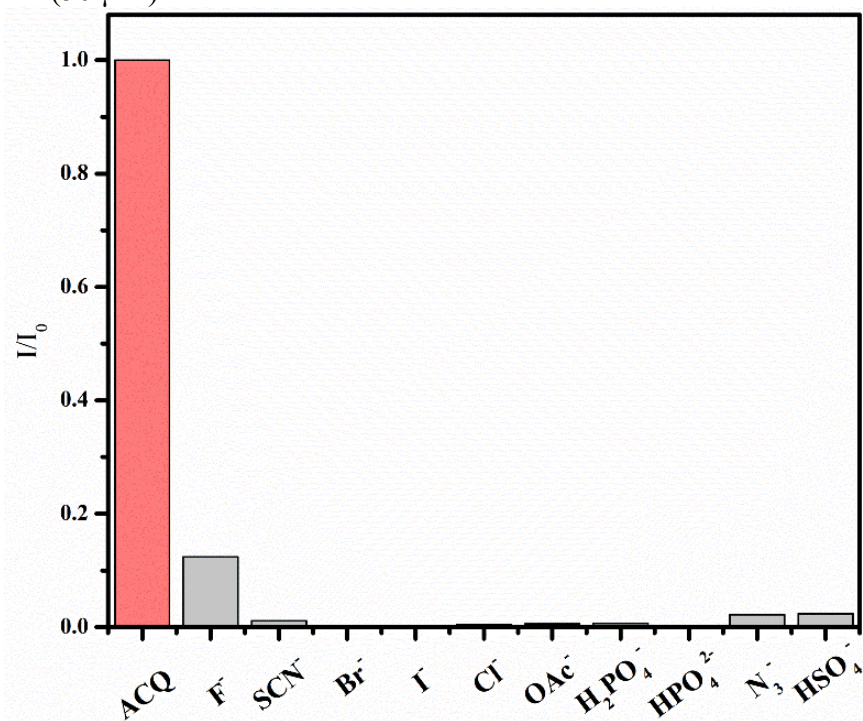

**Fig. S14** Intensity of ACQ (10  $\mu\text{M}$ ) in the presence of various competing anions (50  $\mu\text{M}$ ) in the presence of  $\text{F}^-$  (50  $\mu\text{M}$ ).

## 1. General procedure for determining binding Stoichiometry of ACQ with Cu<sup>2+</sup>/Pd<sup>2+</sup>/F<sup>-</sup> from Jobs plot:

- Stock solution of same concentration of ACQ and analytes (Cu<sup>2+</sup>, Pd<sup>2+</sup> and F<sup>-</sup>) were prepared in the orders 50 μM and 100 μM (in H<sub>2</sub>O for Cu<sup>2+</sup> and Pd<sup>2+</sup> respectively) and 10 μM (in DMSO for F<sup>-</sup>).
- The absorption spectrum in each case by varying the mole fractions (but keeping the volume constant) was recorded.
- Job plots were obtained by plotting absorbance variation value at λ<sub>max</sub> (527 nm for Cu<sup>2+</sup> & Pd<sup>2+</sup> and 656 nm for F<sup>-</sup>) versus mole fraction of Cu<sup>2+</sup>, Pd<sup>2+</sup> and F<sup>-</sup>.
- The maximum value of absorbance was obtained at a mole fraction of X from which the binding ratio of analyte (a) to ACQ (l) is determined as

$$\frac{a}{l} = \frac{X}{1 - X}$$

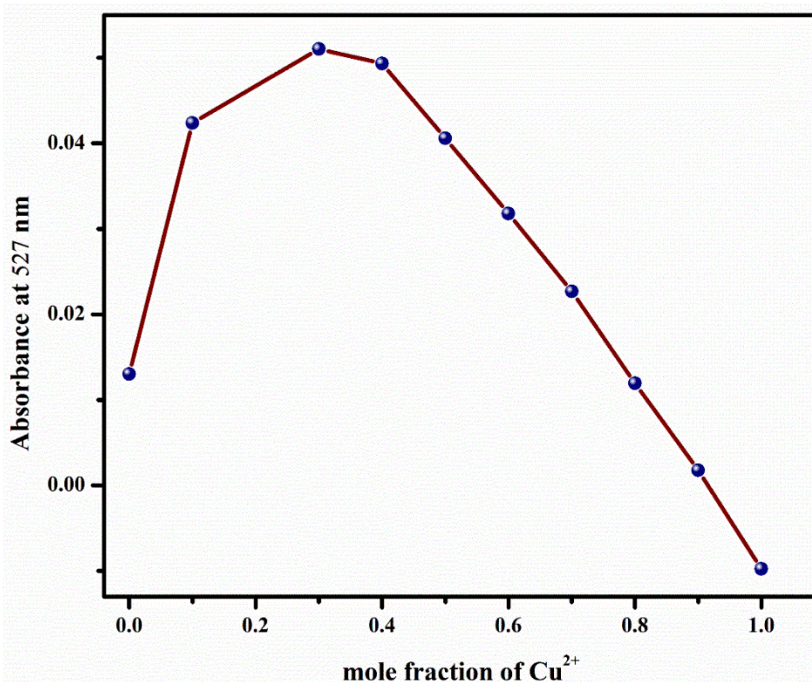

**Fig. S15** Absorbance variation value at 527 nm versus Cu<sup>2+</sup> mole fraction, and the maximum value of absorbance was obtained at a mole fraction of 0.3, indicating a 1:2 (a:l) stoichiometry for the complex between Cu<sup>2+</sup> and ACQ.



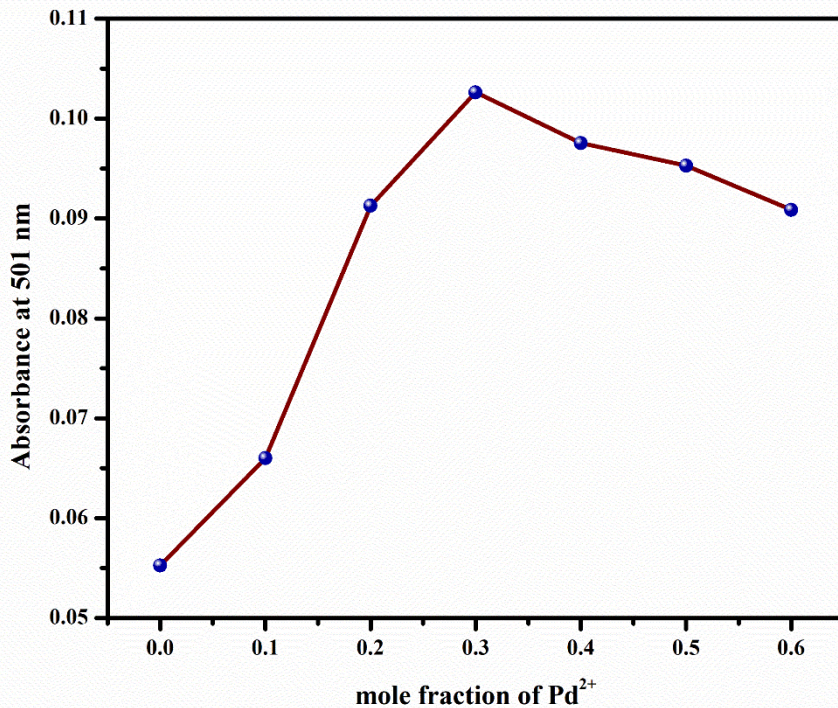

**Fig. S16** Absorbance variation value at 527 nm versus Pd<sup>2+</sup> mole fraction and the maximum value of absorbance was obtained at a mole fraction of 0.3, indicating a 1:2 (a:l) stoichiometry for the complex between Pd<sup>2+</sup> and ACQ.

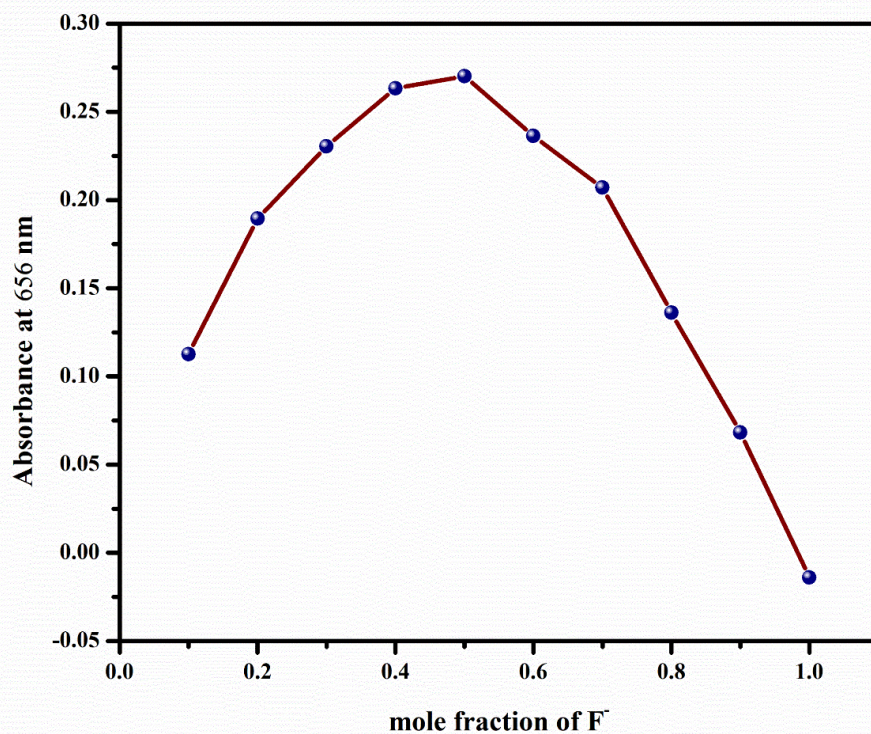

**Fig. S17** Absorbance variation value at 656 nm versus F<sup>-</sup> mole fraction, and the maximum value of absorbance was obtained at a mole fraction of 0.5, indicating a 1:1 (a: l) stoichiometry for the complex between F<sup>-</sup> and ACQ.

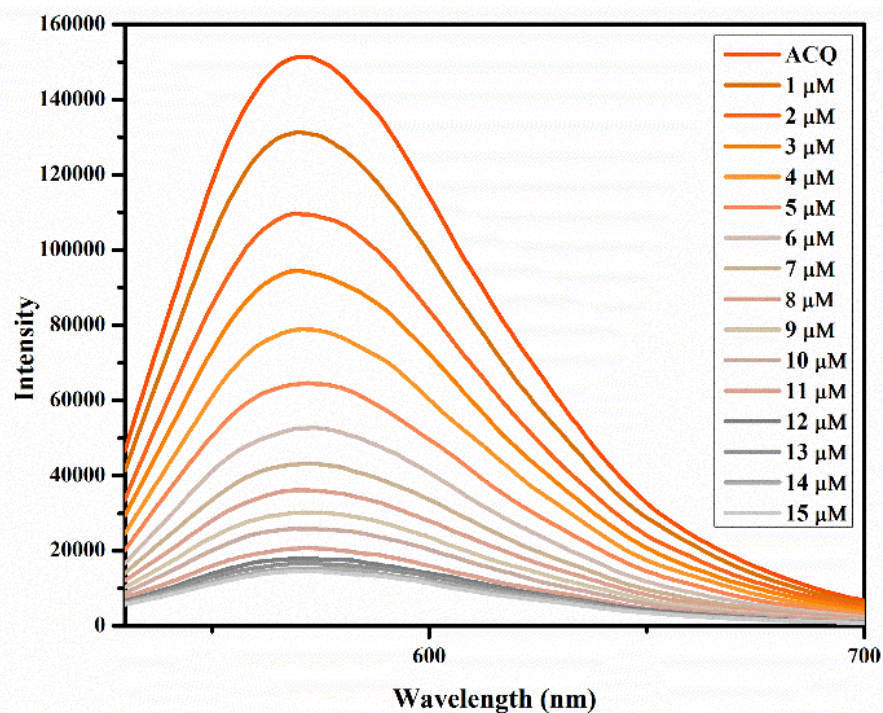

**Fig. S18.** Fluorescence emission spectra (at 577 nm) of ACQ (50 μM) with the addition of various concentrations of Cu<sup>2+</sup> (0-15 μM) in H<sub>2</sub>O respectively

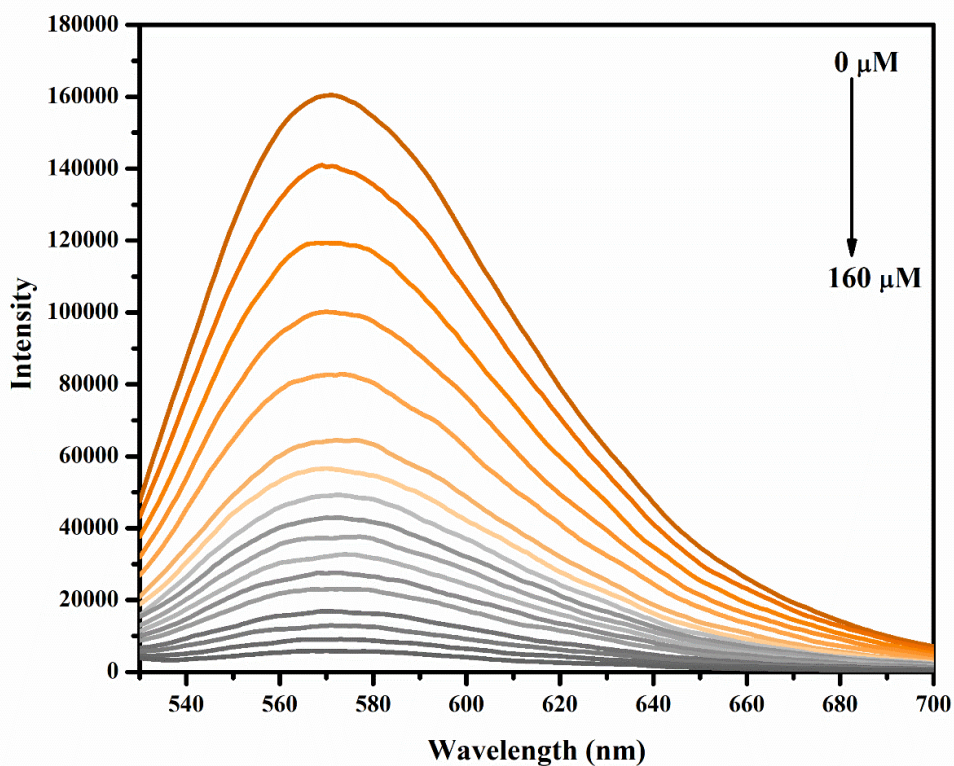

**Fig. S19.** Fluorescence emission spectra of ACQ (10 μM) with the addition of various concentrations of Pd<sup>2+</sup> (0-160 μM). [Side entrance slit: 3 nm bandpass; side exit slit: 3 nm bandpass]

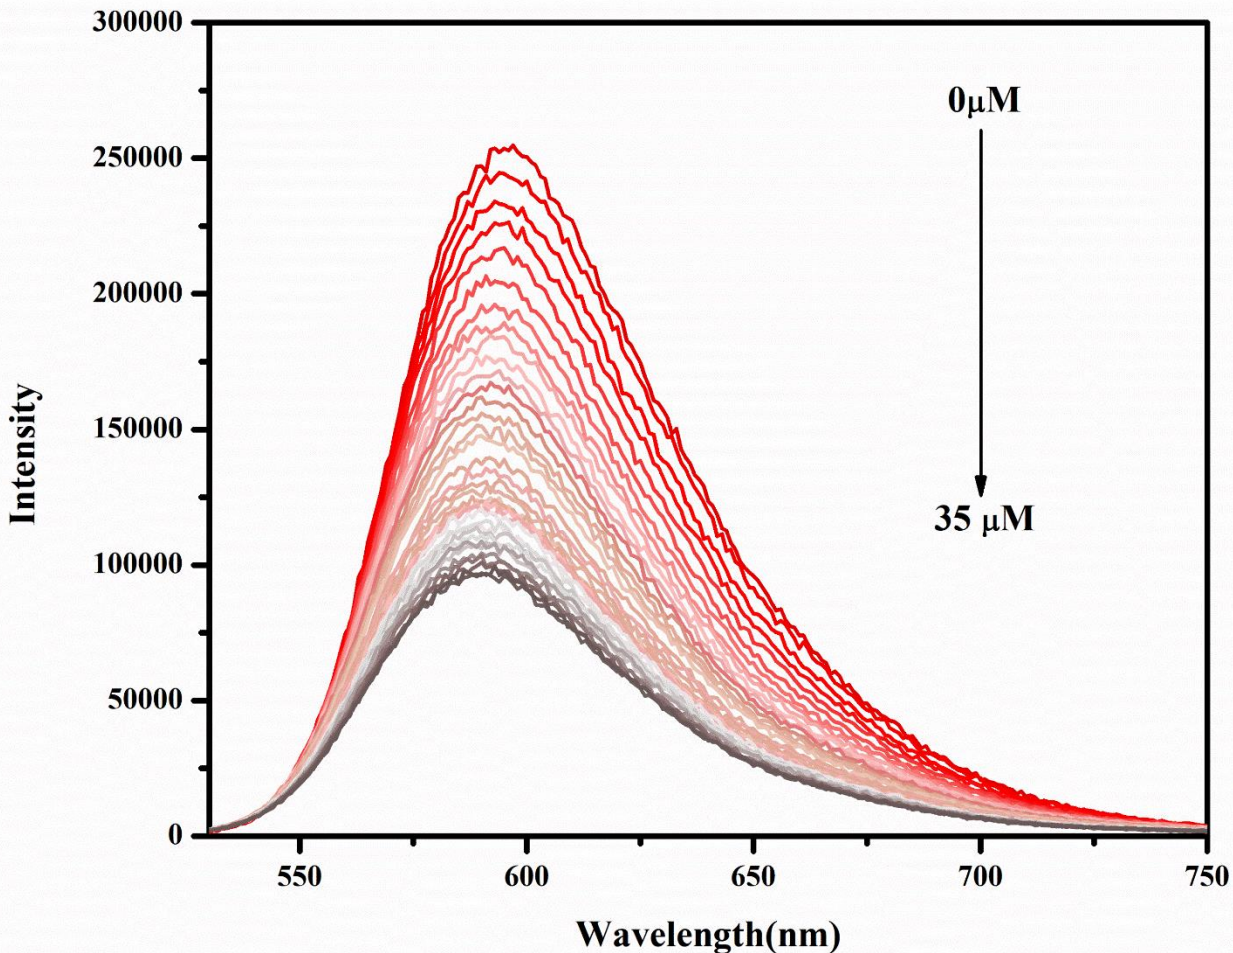

**Fig. S20.** Fluorescence emission spectra of ACQ (10  $\mu\text{M}$ ) with the addition of various concentrations of  $\text{F}^-$  (0-15  $\mu\text{M}$ ) and (0-35  $\mu\text{M}$ ) respectively

## 2. Association constant determination:

### 2a. Using UV Absorbance data:

- Considering a **a : l** ratio stoichiometry for interaction between ACQ and  $\text{Cu}^{2+}/\text{Pd}^{2+}/\text{F}^-$  as **m**, where **m=(a/l)** binding constant was calculated using

$$\frac{1}{A-A_0} = \frac{1}{(K_a)^m (A_{\max}-A_0) [M^{n\pm}]^m} + \frac{1}{(A_{\max}-A_0)}$$

- $[M^{n\pm}]$  is the concentration of the  $\text{Cu}^{2+}/\text{Pd}^{2+}/\text{F}^-$  ions added during titration studies.
- $A_0$  = absorbance of ACQ without  $\text{Cu}^{2+}/\text{Pd}^{2+}/\text{F}^-$
- $A$  = absorbance in presence of  $\text{Cu}^{2+}/\text{Pd}^{2+}/\text{F}^-$
- $A_{\max}$  = absorbance intensity at the maximum concentration of  $\text{Cu}^{2+}/\text{Pd}^{2+}/\text{F}^-$
- The value  $(K_a)^m$  obtained from the ratio of intercept and slope of Benesi-Hildebrand plot was used to calculate  $K_a$ .

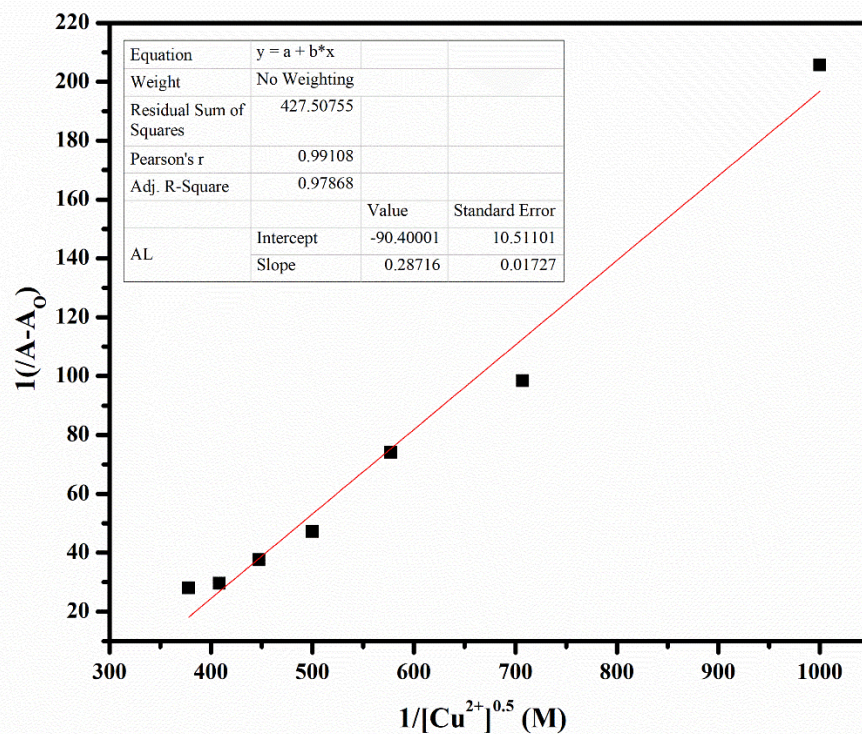

**Fig. S21** Benesi–Hildebrand plot from UV-Visible titration data of ACQ (50  $\mu\text{M}$ ) with  $\text{Cu}^{2+}$  (0-15  $\mu\text{M}$ ).  $K_a=9.9 \times 10^4 \text{ M}^{-2}$

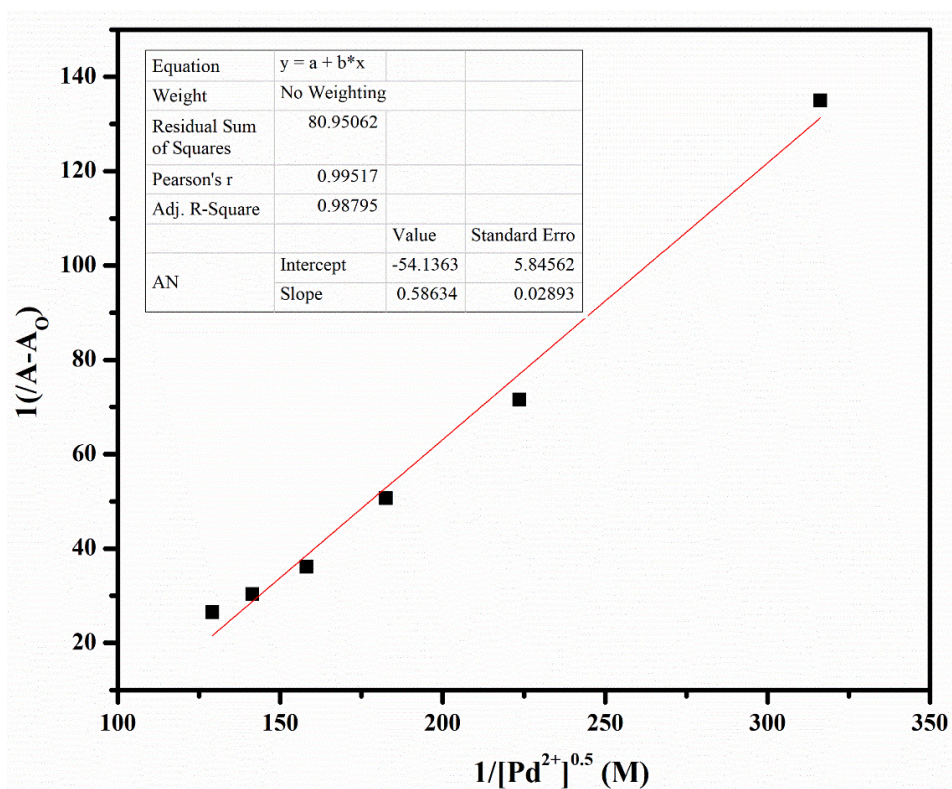

**Fig. S22** Benesi–Hildebrand plot from UV-Visible titration data of ACQ (50  $\mu\text{M}$ ) with  $\text{Pd}^{2+}$  (0-150  $\mu\text{M}$ ).  $K_a=8.7 \times 10^3 \text{ M}^{-2}$

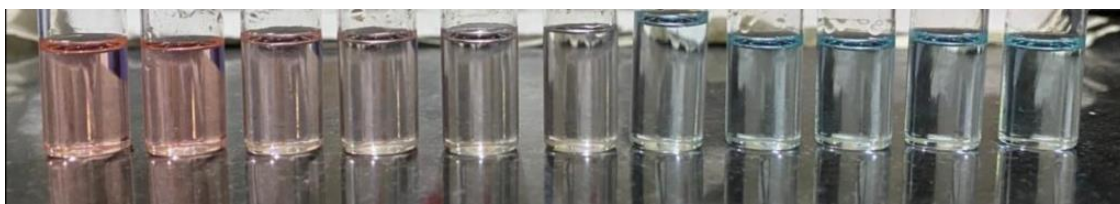

**Fig. S23.** Visible color changes of ACQ (50  $\mu\text{M}$ ) on continuous addition of  $\text{F}^-$  ions (0-15  $\mu\text{M}$ )

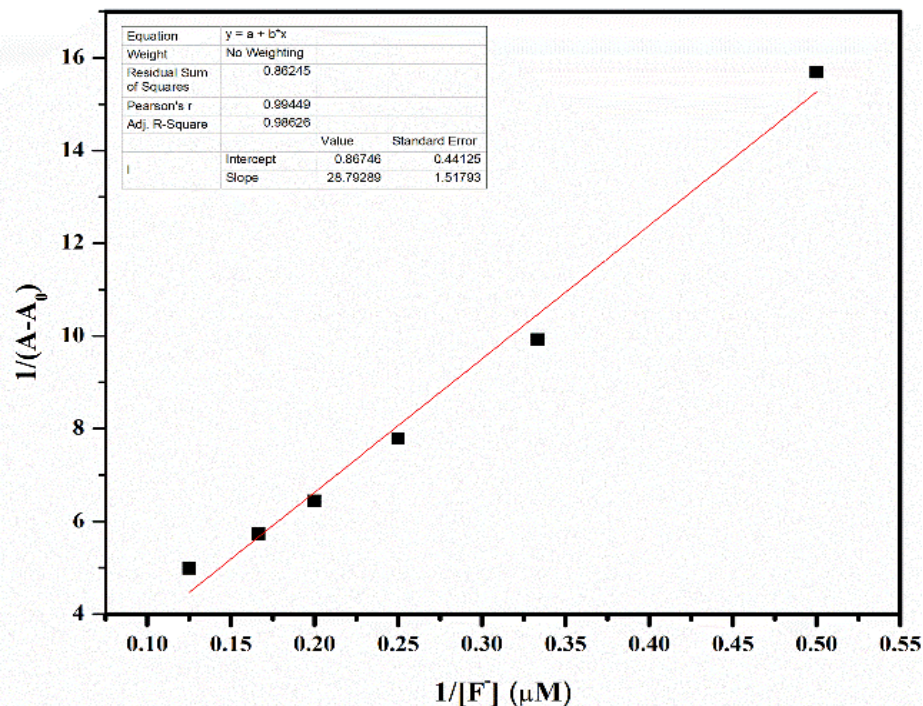

**Fig. S24** Benesi–Hildebrand plot from UV-Visible titration data of ACQ (10  $\mu\text{M}$ ) with  $\text{F}^-$  (0-15  $\mu\text{M}$ ).  $K_a = 5.8 \times 10^4 \text{ M}^{-1}$

## 2b. Using emission intensity data:

- Considering a  $a:l$  ratio stoichiometry for interaction between ACQ and  $\text{Cu}^{2+}/\text{Pd}^{2+}/\text{F}^-$  as  $m$ , where  $m=(a/l)$  binding constant was calculated using

$$\frac{1}{F-F_0} = \frac{1}{(K_a)^m (F_{\max}-F_0) [M^{n\pm}]^m} + \frac{1}{(F_{\max}-F_0)}$$

- $[M^{n\pm}]$  is the concentration of the  $\text{Cu}^{2+}/\text{Pd}^{2+}/\text{F}^-$  ions added during titration studies.
- $F_0$  = fluorescence intensity of ACQ without  $\text{Cu}^{2+}/\text{Pd}^{2+}/\text{F}^-$
- $F$  = fluorescence intensity in presence of  $\text{Cu}^{2+}/\text{Pd}^{2+}/\text{F}^-$
- $F_{\max}$  = fluorescence intensity at the maximum concentration of  $\text{Cu}^{2+}/\text{Pd}^{2+}/\text{F}^-$
- The value  $(K_a)^m$  obtained from the ratio of intercept to slope of the linear plot between  $1/(F-F_0)$  vs  $1/[M^{n\pm}]^m$  was used to calculate  $K_a$ .

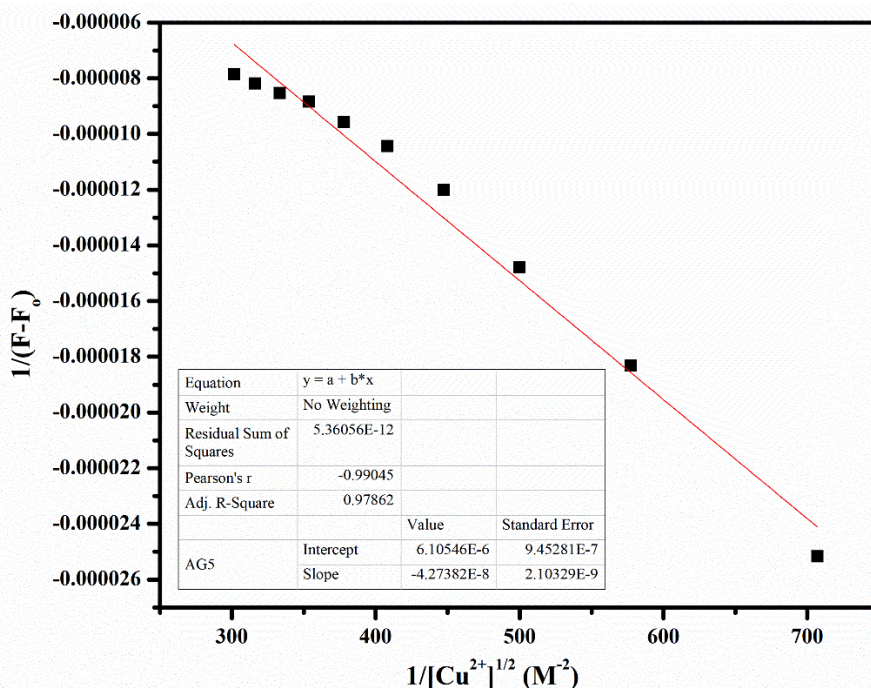

**Fig. S25** Benesi–Hildebrand plot from fluorescence titration data of ACQ (50  $\mu\text{M}$ ) with  $\text{Cu}^{2+}$  (0-15  $\mu\text{M}$ ).  $K_a=3.18 \times 10^4 \text{ M}^{-2}$

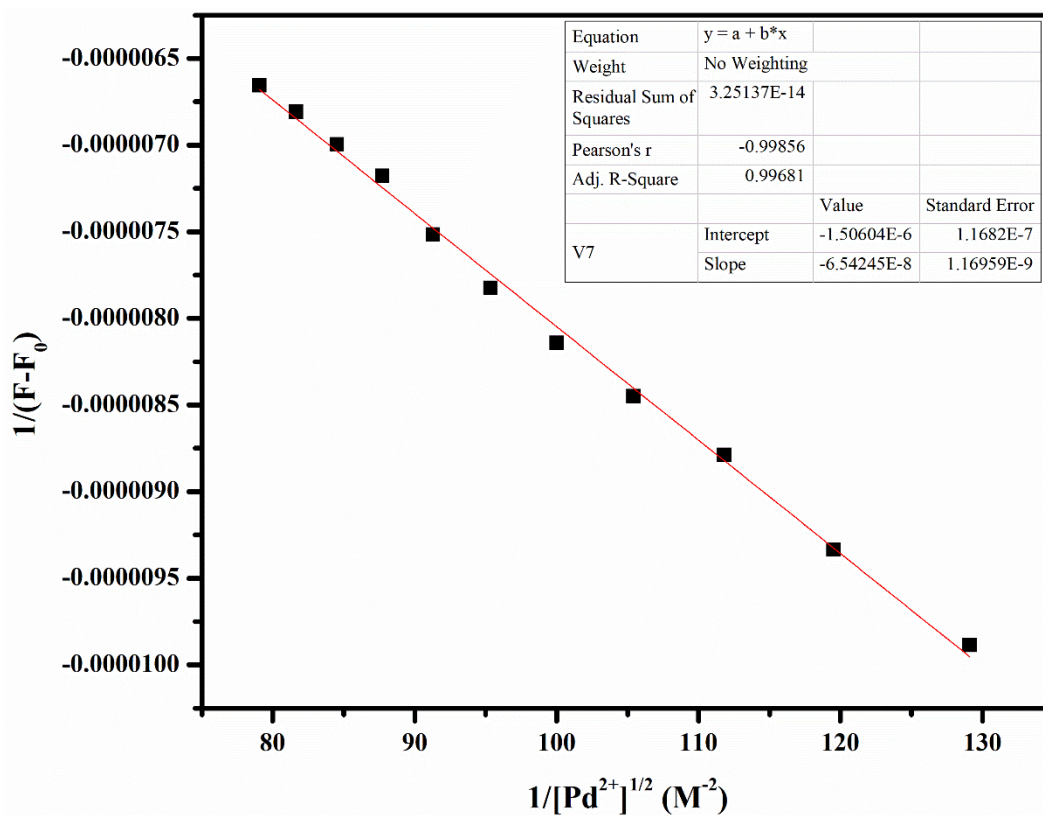

**Fig. S26** Benesi–Hildebrand plot from fluorescence titration data of ACQ (50  $\mu\text{M}$ ) with  $\text{Pd}^{2+}$  (0-160  $\mu\text{M}$ ).  $K_a=0.5 \times 10^3 \text{ M}^{-2}$

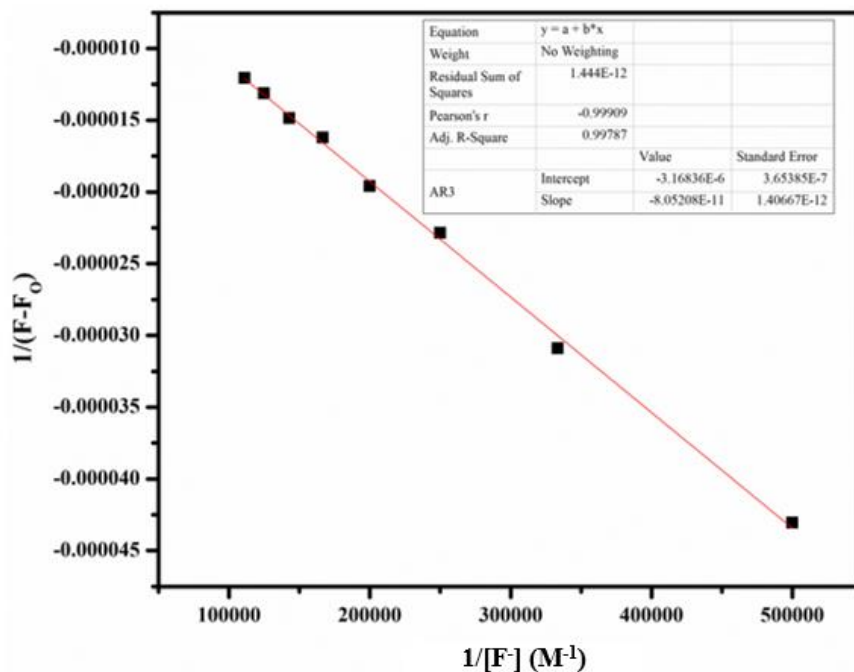

**Fig. S27** Benesi–Hildebrand plot from fluorescence titration data of ACQ (10  $\mu\text{M}$ ) with  $\text{F}^-$  (0-35  $\mu\text{M}$ ).  $K_a=3.8 \times 10^4 \text{ M}^{-1}$

### 3. Determination of detection limit

LOD was calculated using this formula  $3\sigma/K$  where;

- K is Slope value taken from Absorbance/Intensity vs Concentration of  $\text{Cu}^{2+}$ /  $\text{Pd}^{2+}$ /  $\text{F}^-$  plot
- $\sigma$  is the standard deviation of the blank solution

#### 3a. Using UV Absorbance data:

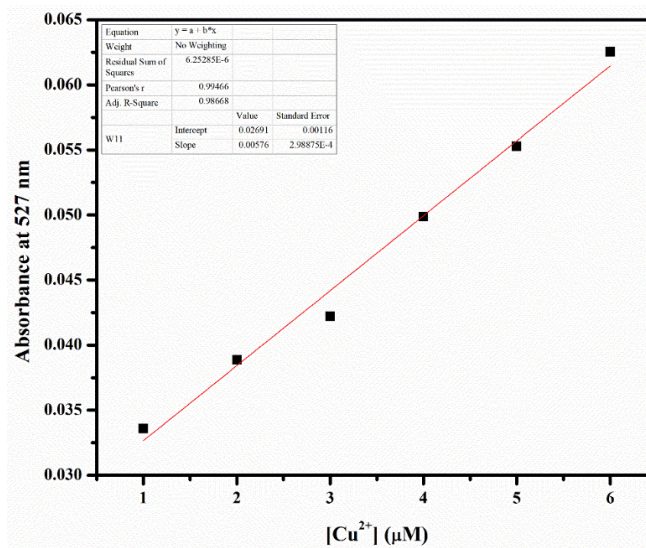

**Fig. S28** Plot of Absorbance versus concentration of  $\text{Cu}^{2+}$  at 527 nm and the calculated limit of Detection of ACQ for  $\text{Cu}^{2+}$  is 0.75  $\mu\text{M}$

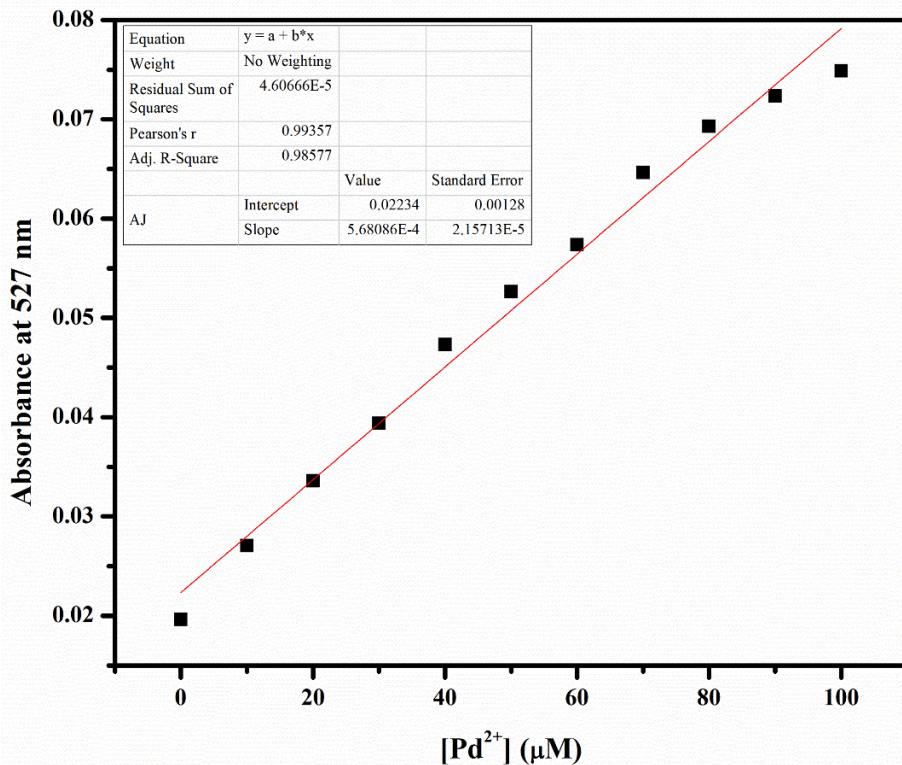

**Fig.S29** Plot of Absorbance versus concentration of Pd<sup>2+</sup> at 527 nm and the calculated limit of Detection of ACQ for Pd<sup>2+</sup> is 7.6 µM

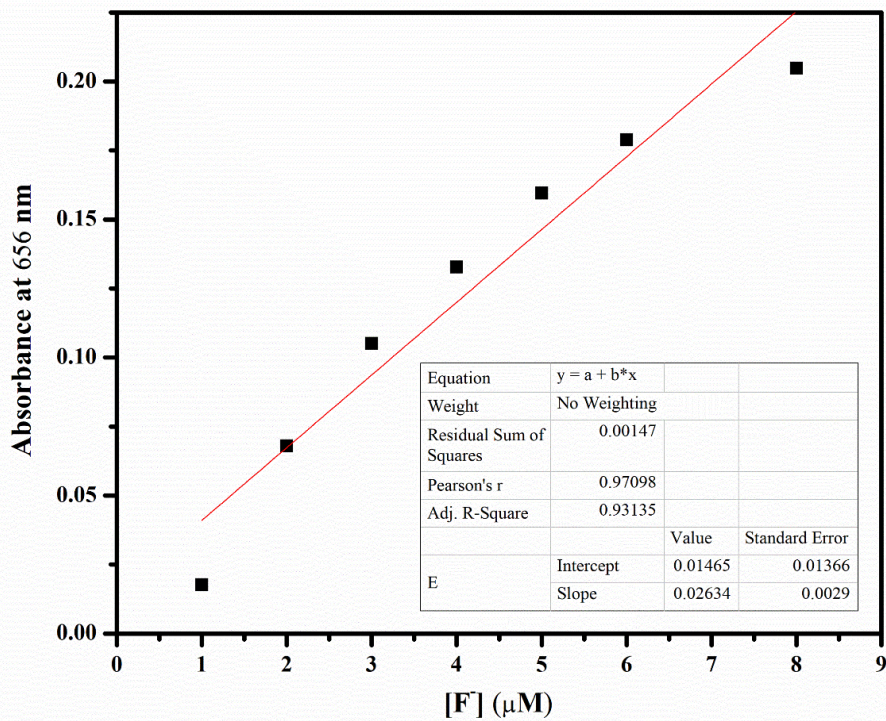

**Fig. S30** Plot of Absorbance versus concentration of F<sup>-</sup> at 656 nm and the calculated limit of Detection of ACQ for F<sup>-</sup> is 0.53 µM



### 3b. Using emission intensity data:

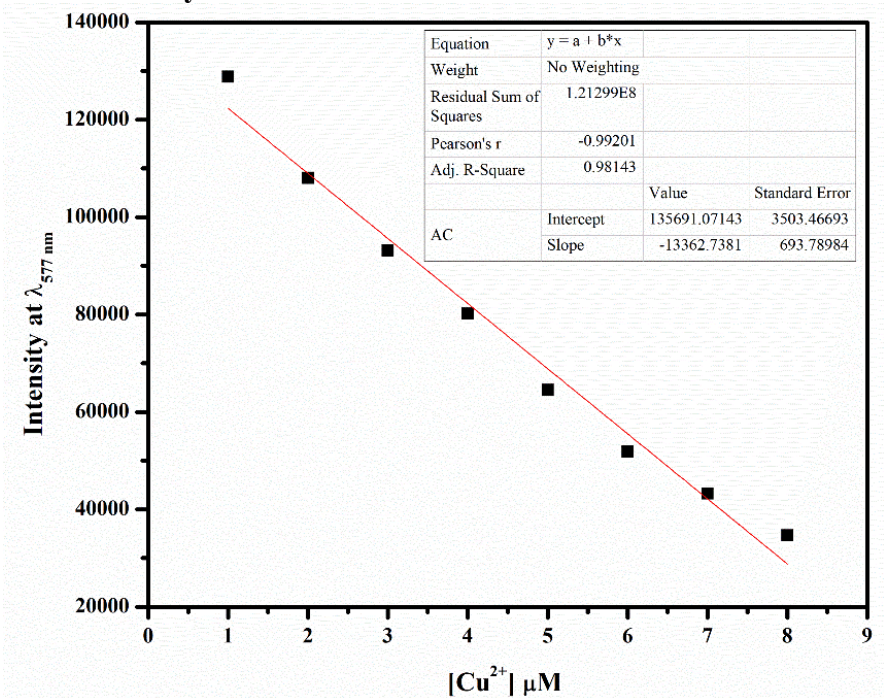

**Fig. S31** Plot of Intensity at 577 nm versus concentration of  $\text{Cu}^{2+}$  and the calculated limit of Detection of ACQ for  $\text{Cu}^{2+}$  is  $0.25 \mu\text{M}$

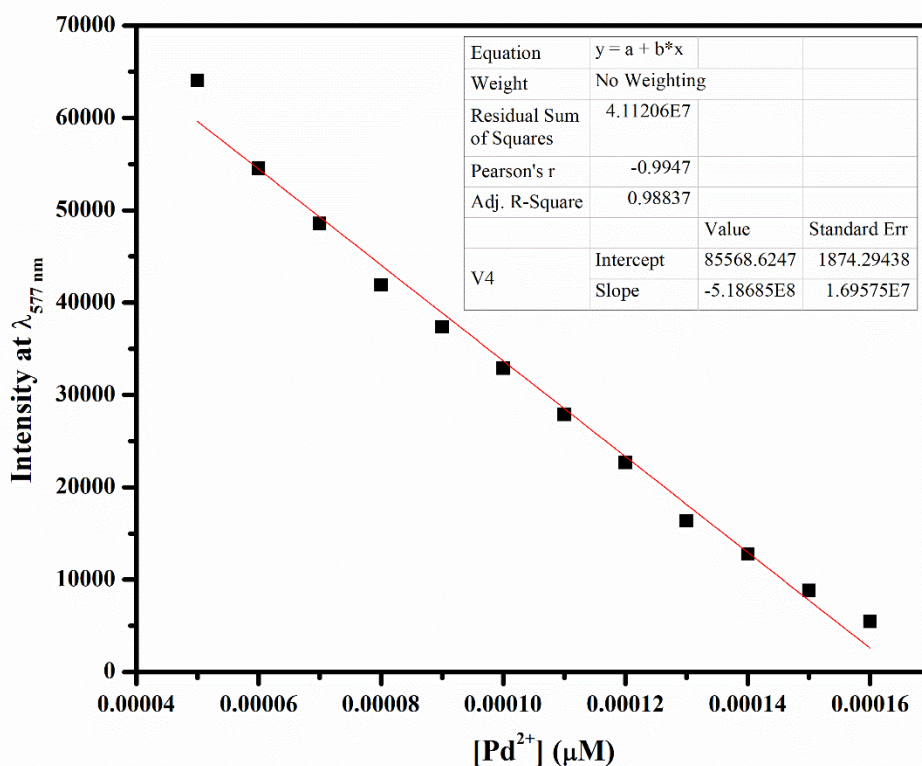

**Fig. S32** Plot of Intensity versus concentration of  $\text{Pd}^{2+}$  at 577 nm and the calculated limit of Detection of ACQ for  $\text{Pd}^{2+}$  is  $11.87 \mu\text{M}$

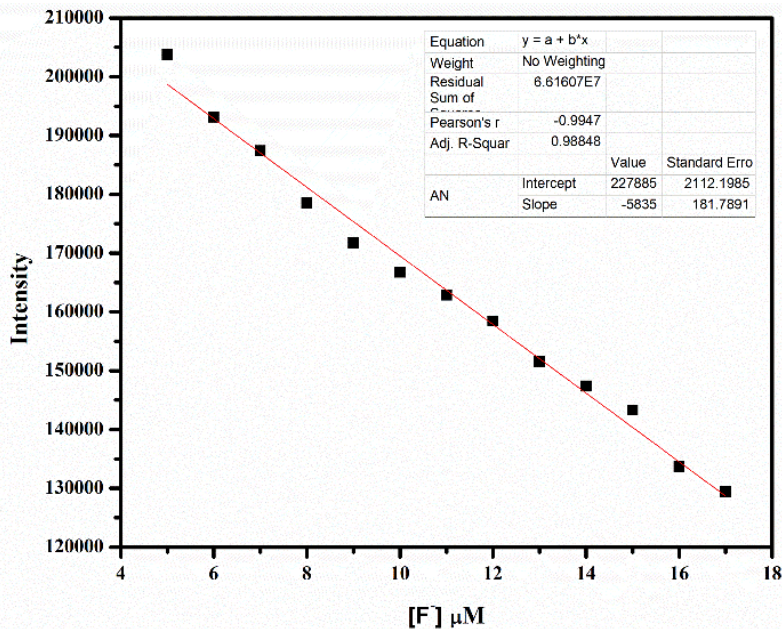

**Fig. S33** Plot of Intensity versus concentration of  $F^-$  at 598 nm and the calculated limit of Detection of ACQ for  $F^-$  is 1.15  $\mu M$

#### 4. Quenching Constant

- The Stern–Volmer graph represents the quenching constant ( $K_{SV}$ ) which was determined from the slope of the following equation:

$$\frac{F_0}{F} = 1 + K_{sv}[M^{n\pm}]$$

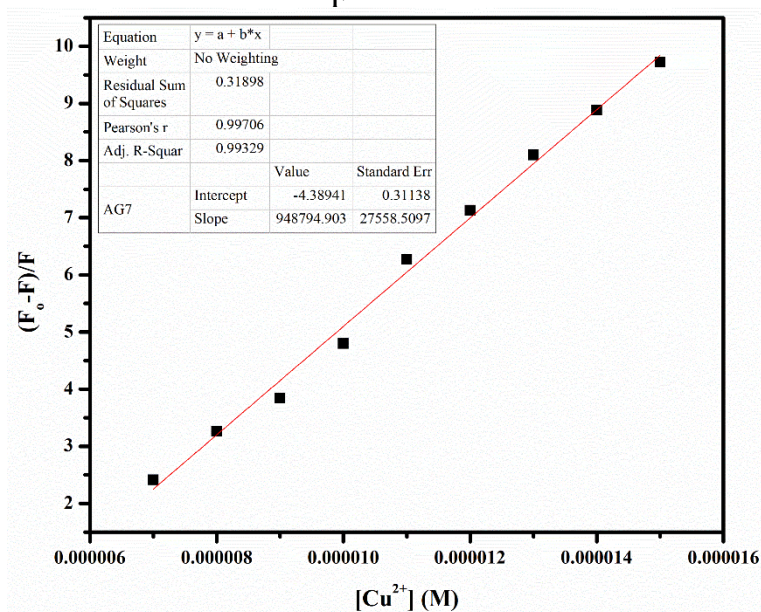

**Fig. S34** Stern-Volmer plot for ACQ against varying concentrations of  $Cu^{2+}$  in the range of 0-15  $\mu M$

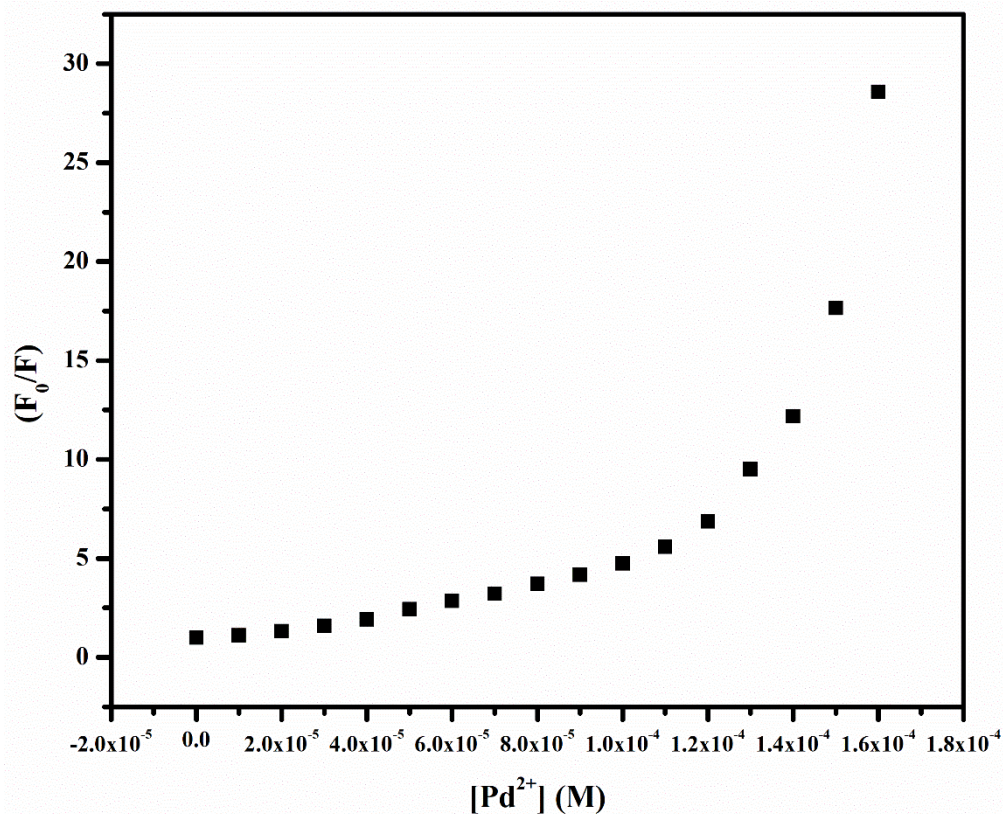

Fig. S35 Fractional fluorescence ( $F_0/F$ ) versus  $[Pd^{2+}]$  plot in the range of 0-180  $\mu M$

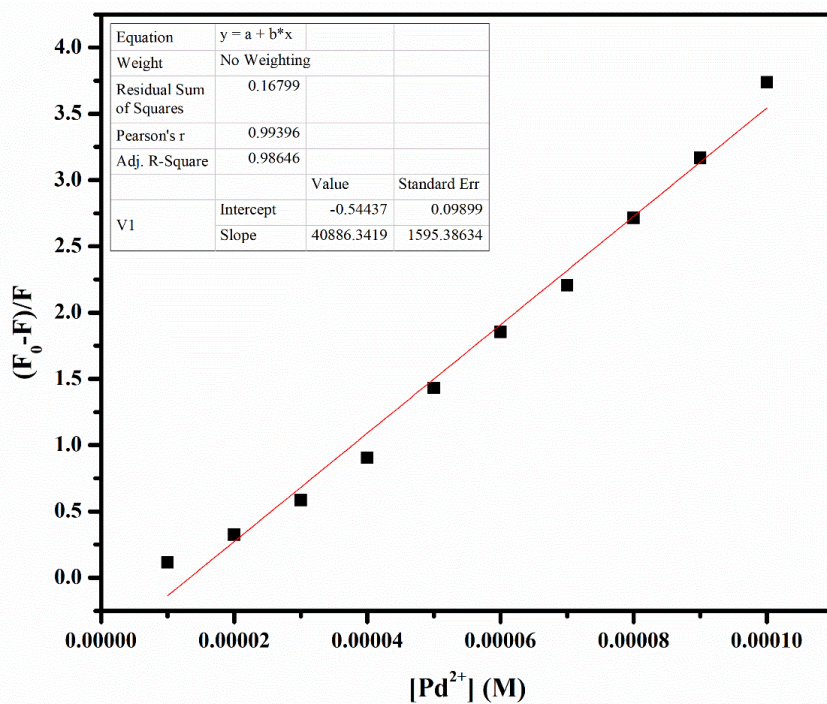

Fig. S36 Stern-Volmer plot for ACQ against varying concentrations of  $Pd^{2+}$  in the range of 0-100  $\mu M$

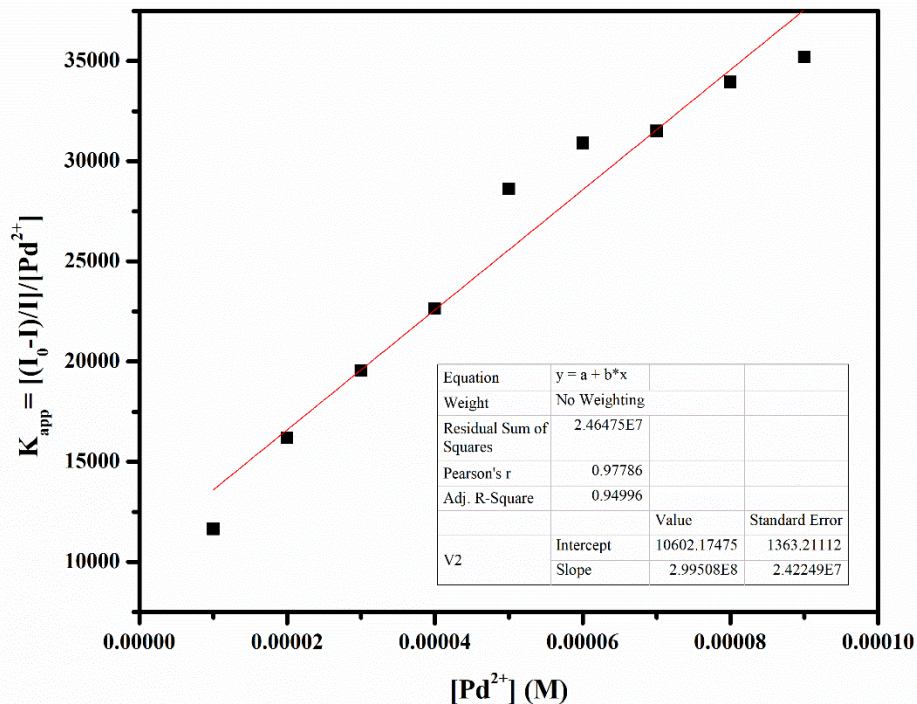

**Fig. S37** Plot of  $K_{app}$  versus  $[Pd^{2+}]$

In case of  $Pd^{2+}$ , at higher concentrations quenching occurred due to both complex formation as well as collisional quenching with  $Pd^{2+}$ , which is evident from the fractional fluorescence ( $F_0/F$ ) versus  $[Pd^{2+}]$  plot as well as the lifetime measurements where the characteristic upward curvature and the lowering of average lifetime upon increasing the concentration of  $Pd^{2+}$  indicated both static and dynamic quenching.

The Static quenching constant ( $K_{sv}$ ),  $2.6 \times 10^4 M^{-1}$  was determined from the Stern-Volmer plot from the low concentration region of  $Pd^{2+}$  using the equation

$$\frac{F_0}{F} = 1 + K_{sv}[Pd^{2+}]$$

While the dynamic quenching constant was obtained from the plot of  $K_{app}$  (Apparent Quenching constant) versus  $[Pd^{2+}]$  where

$$K_{app} = \left[ \frac{F_0}{F} - 1 \right] \frac{1}{[Pd^{2+}]} = (K_D + K_S) + K_D K_S [Pd^{2+}]$$

The individual values of  $K_D$  and  $K_S$  were obtained from straight line with an intercept(I) of  $K_D + K_S$  and a slope(S) of  $K_D K_S$ . Since the value of  $K_{sv}$  (or  $K_S$ ) from the Stern Volmer plot is known, upon solving the quadratic equation  $K_S^2 - K_S I + S = 0$ ,

$2.1 \times 10^4 M^{-1}$  was assigned as Static Quenching constant ( $K_{sv}$ ) and from the formula of Slope(S) the value of Dynamic Quenching constant ( $K_D$ ) was calculated as  $1.3 \times 10^4 M^{-1}$

#### Reference used for the calculations

DC Santra, MK Bera, PK Sukul and S Malik, Chem. Eur. J. 2016, 22, 2012 – 2019.

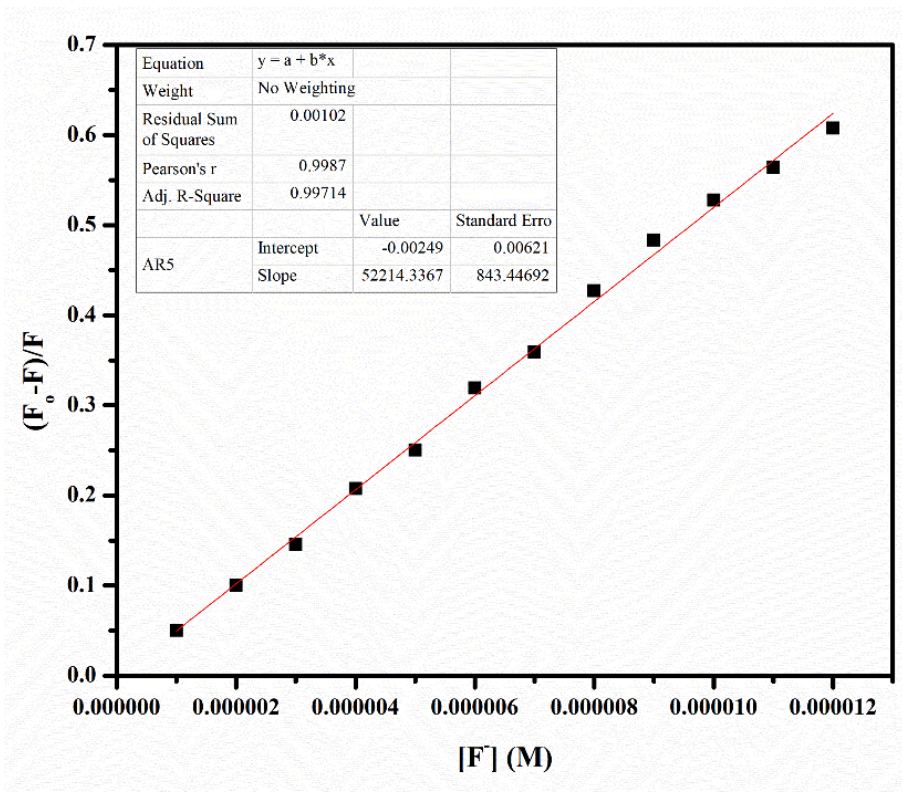

**Fig. S38** Stern-Volmer plot for ACQ against varying concentrations of F<sup>-</sup> in the range of 0-15 μM

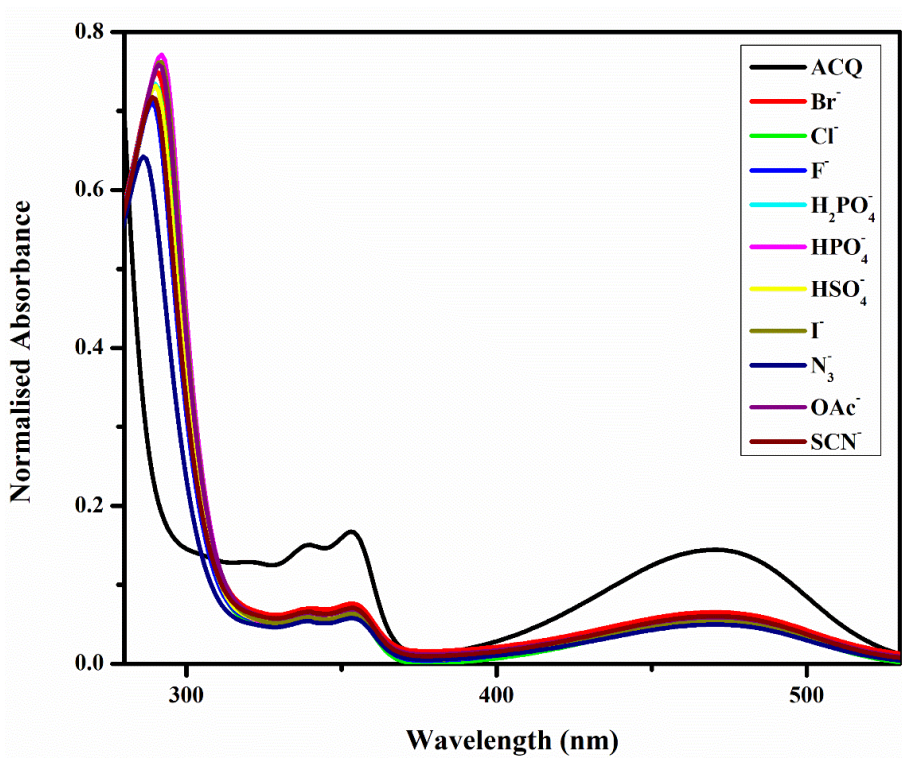

**Fig. S39** UV-vis spectra of ACQ (10 μM) in the presence of various anions (50 μM) in H<sub>2</sub>O

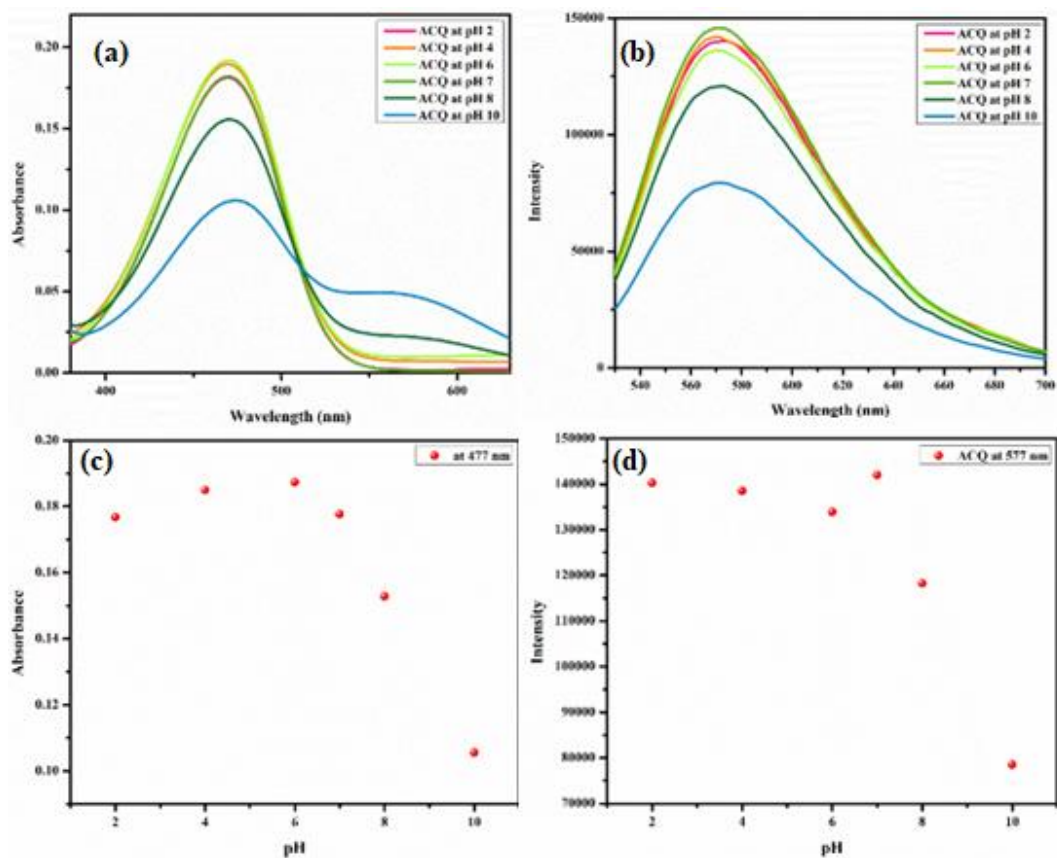

**Fig. S40** (a) Absorbance spectra and (b) Emission spectra of ACQ (50 μM) at different pH. (c) Scatter plot of Absorbance Vs pH and (d) Intensity vs pH for ACQ (50 μM) at 477 and 577 nm respectively.

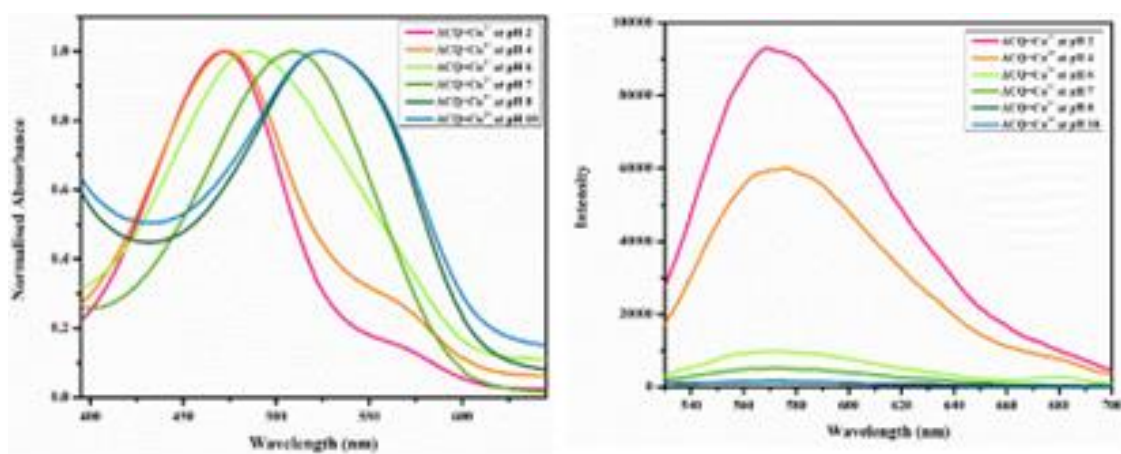

**Fig. S41** (a) Normalized Absorbance spectra and (b) Emission spectra of ACQ (50 μM) + Cu<sup>2+</sup> (20 μM) at different pH

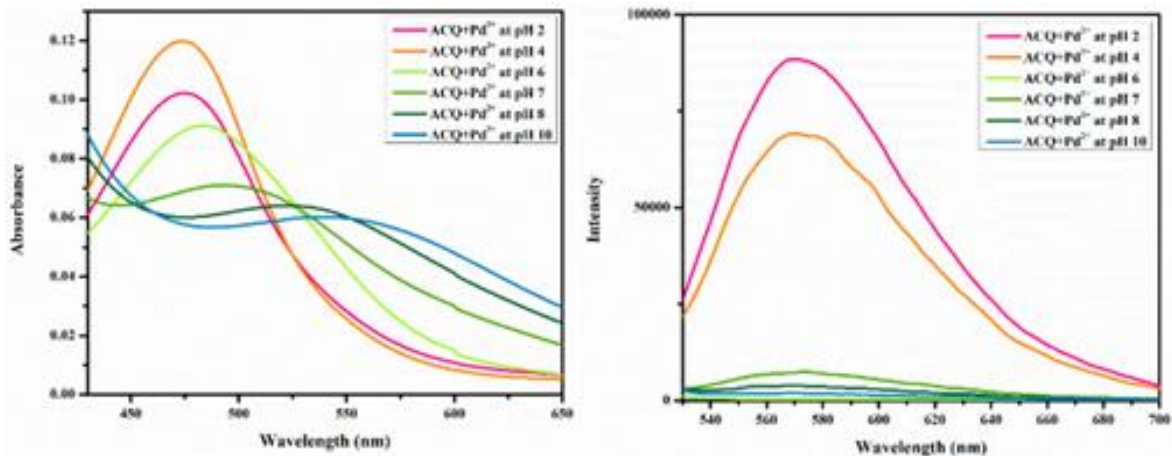

**Fig. S42** (a) Absorbance spectra and (b) Emission spectra of ACQ ( $50\mu\text{M}$ ) +  $\text{Pd}^{2+}$  ( $100\mu\text{M}$ ) at different pH

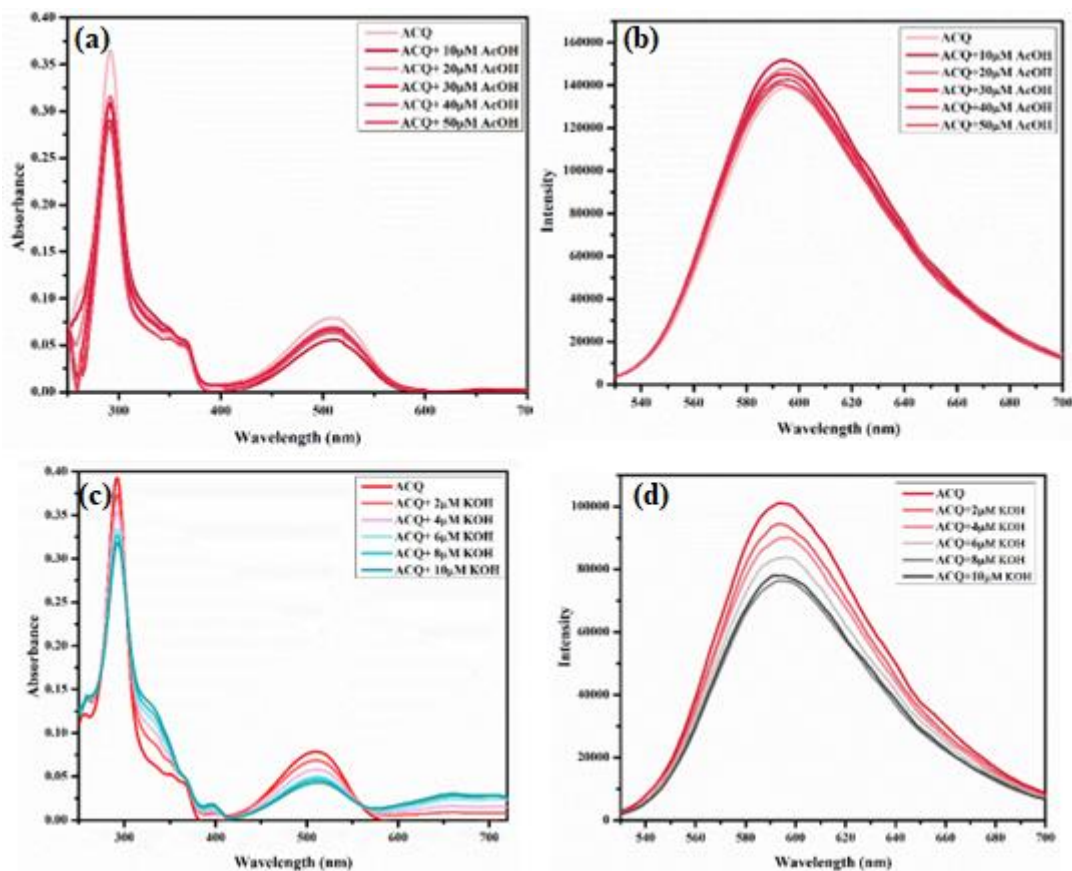

**Fig. S43** (a) Absorbance spectra and (b) Emission spectra of ACQ ( $10\mu\text{M}$ ) with varying concentrations of AcOH ( $10\text{-}50\mu\text{M}$ ) in DMSO (c) Absorbance spectra and (b) Emission spectra of ACQ ( $10\mu\text{M}$ ) with varying concentrations of KOH ( $0\text{-}10\mu\text{M}$ ) in DMSO

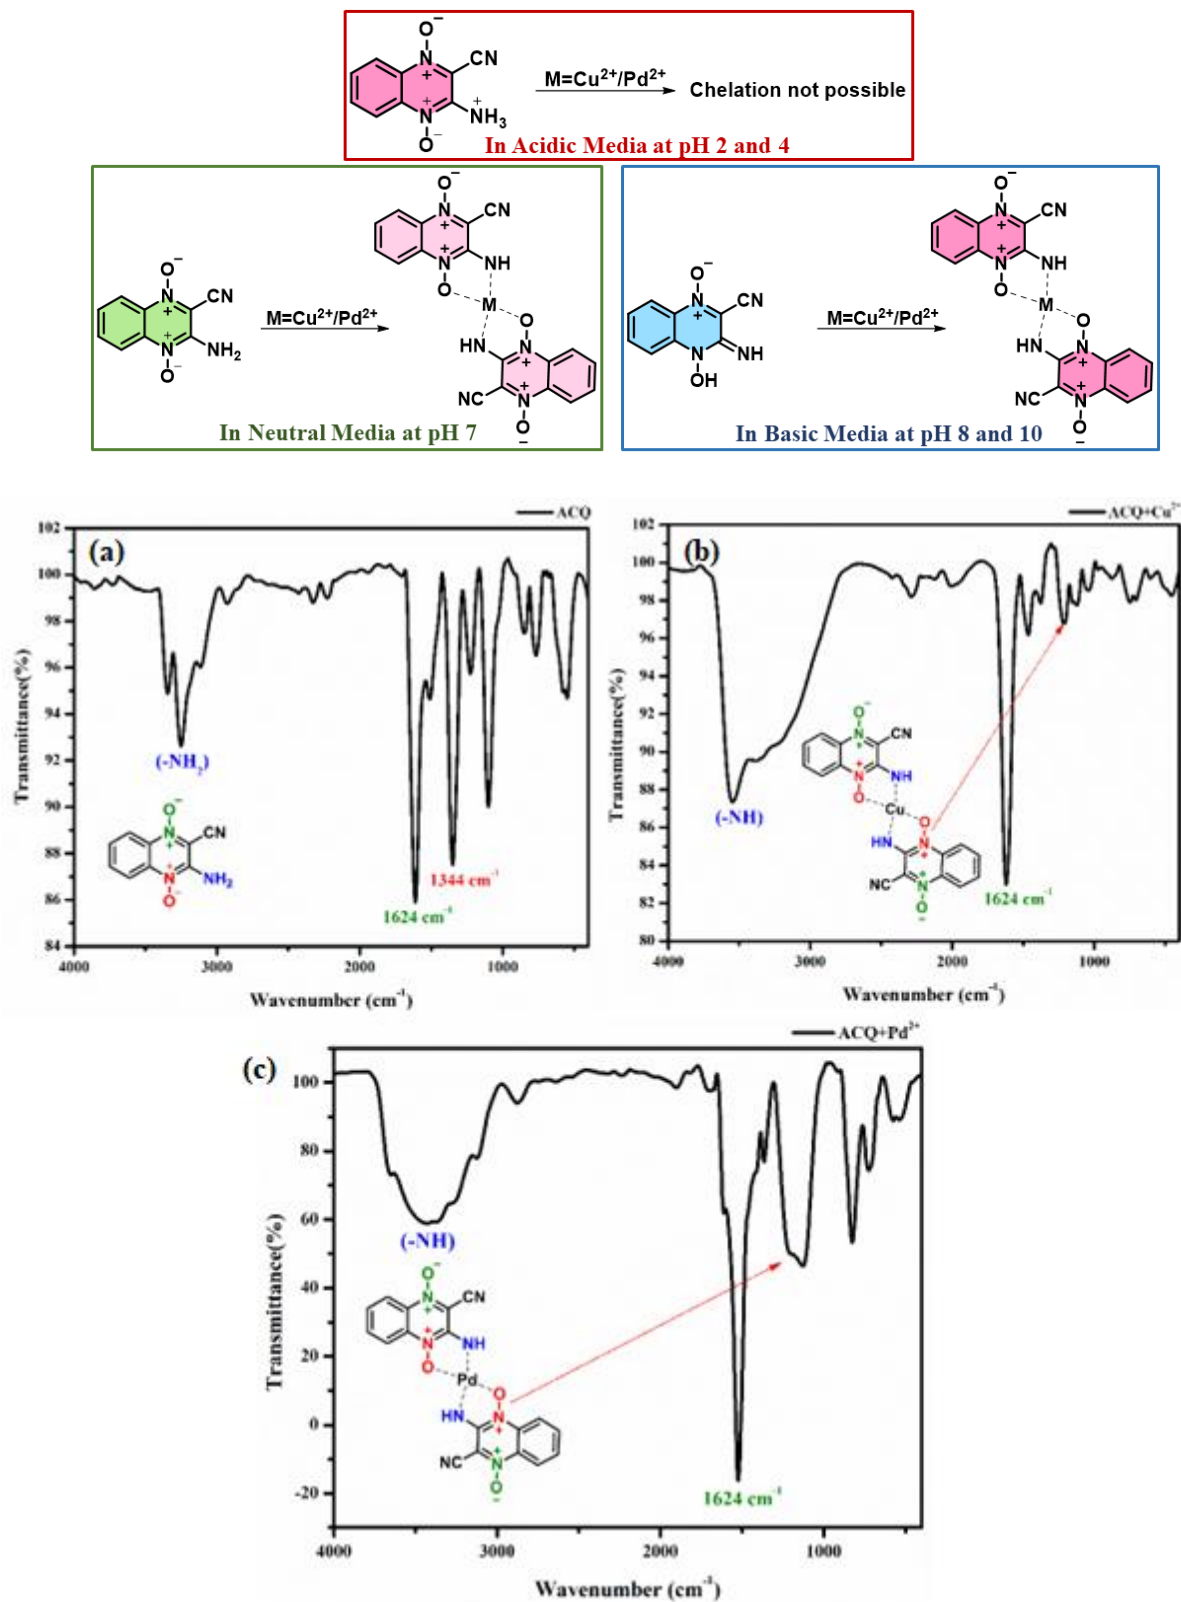

**Fig. S44** Plausible structures of ACQ at different pH and FT-IR Spectrum of (a) ACQ (b) ACQ+Cu<sup>2+</sup> and (c) ACQ+Pd<sup>2+</sup>



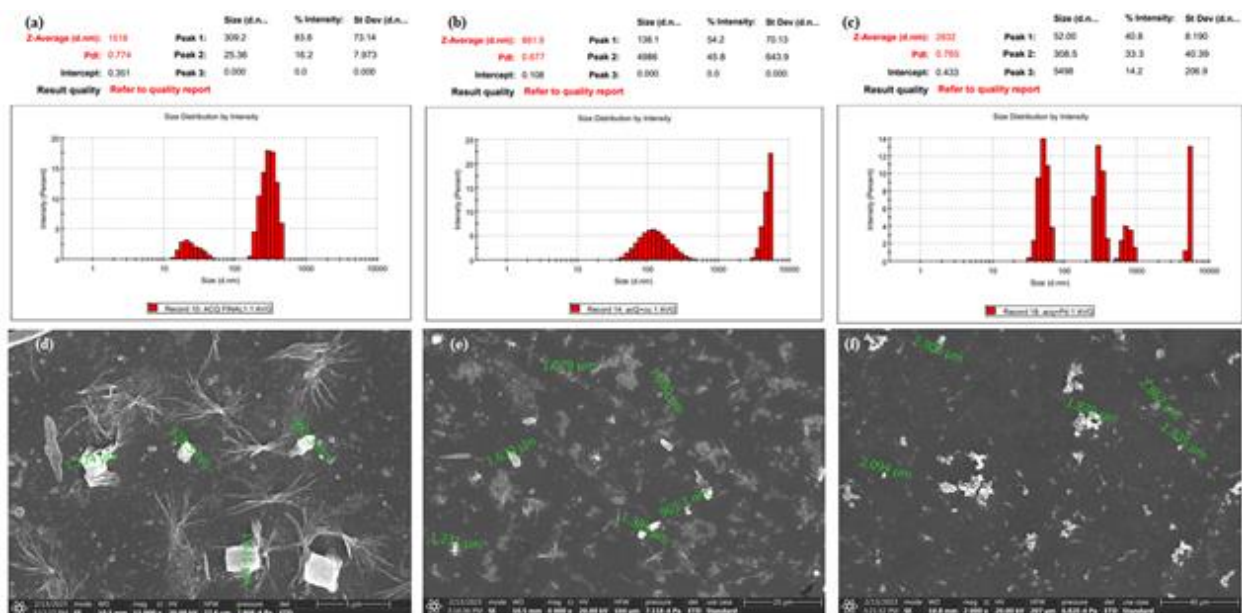

**Fig. S45** Particle size histogram of (a) ACQ (b) ACQ+Cu<sup>2+</sup> (c) ACQ+Pd<sup>2+</sup> and FE-SEM images of (d) ACQ (e) ACQ+Cu<sup>2+</sup> (f) ACQ+Pd<sup>2+</sup>

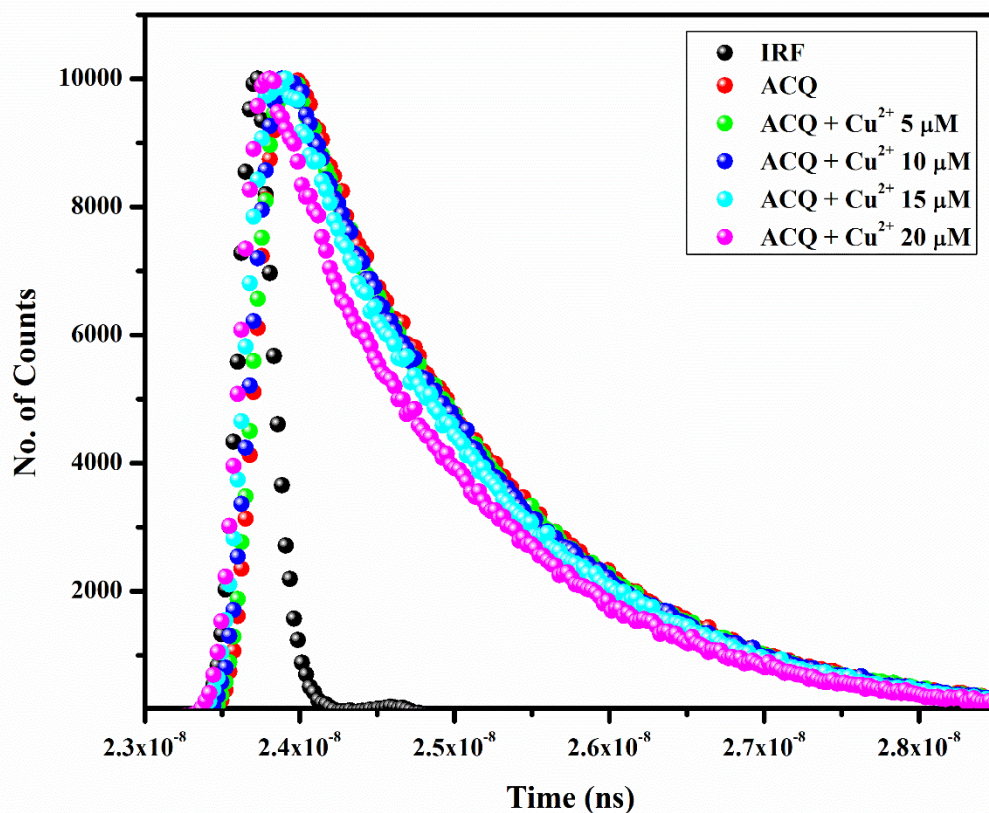

Fig. S46 Time decay plot for ACQ and ACQ+Cu<sup>2+</sup>

| Sample                                         | Average lifetime ( $\tau$ ) | $\chi^2$ |
|------------------------------------------------|-----------------------------|----------|
| ACQ (10 $\mu$ M)                               | 1.10 ns                     | 1.03     |
| ACQ (10 $\mu$ M)+Cu <sup>2+</sup> (5 $\mu$ M)  | 1.09 ns                     | 1.10     |
| ACQ (10 $\mu$ M)+Cu <sup>2+</sup> (10 $\mu$ M) | 1.17 ns                     | 1.07     |
| ACQ (10 $\mu$ M)+Cu <sup>2+</sup> (15 $\mu$ M) | 1.13 ns                     | 1.17     |
| ACQ (10 $\mu$ M)+Cu <sup>2+</sup> (20 $\mu$ M) | 0.82 ns                     | 1.18     |

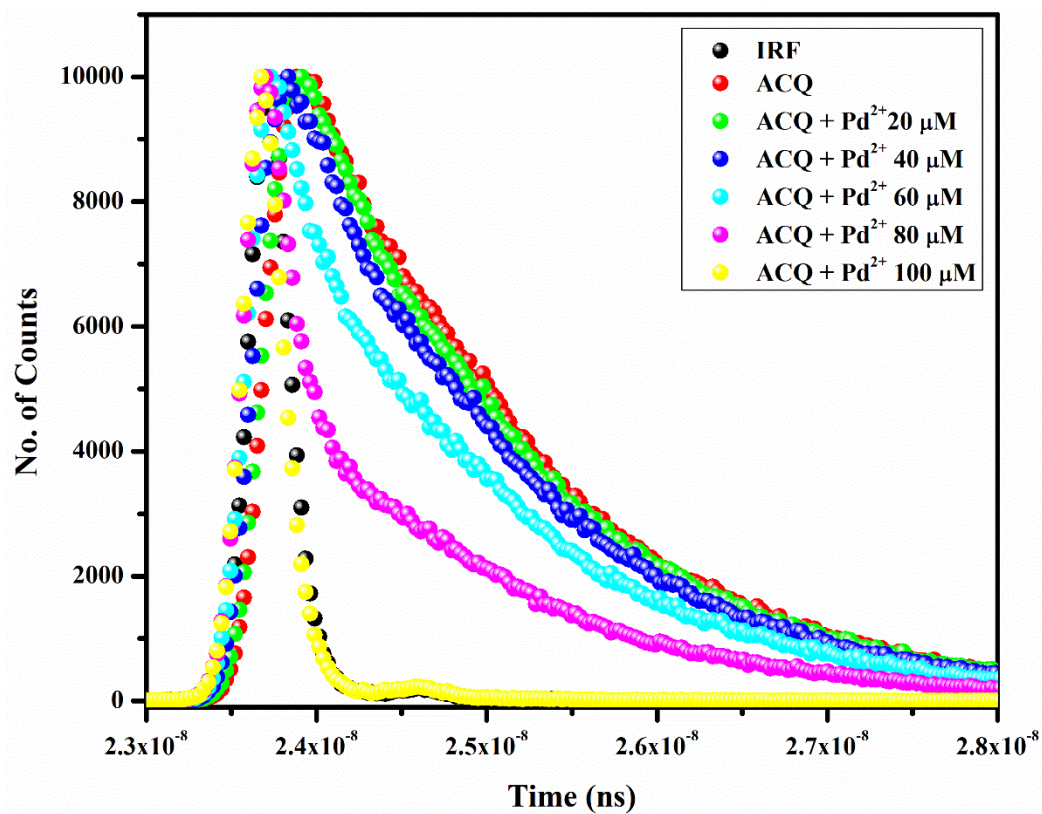

Fig. S47 Time decay plot for ACQ and ACQ+Pd<sup>2+</sup>

| Sample                                           | Average lifetime ( $\tau$ ) | $\chi^2$ |
|--------------------------------------------------|-----------------------------|----------|
| ACQ (10 $\mu$ M)                                 | 1.27 ns                     | 0.99     |
| ACQ (10 $\mu$ M)+Pd <sup>2+</sup> (20 $\mu$ M)   | 1.18 ns                     | 1.04     |
| ACQ (10 $\mu$ M)+ Pd <sup>2+</sup> (40 $\mu$ M)  | 0.86 ns                     | 1.03     |
| ACQ (10 $\mu$ M)+ Pd <sup>2+</sup> (60 $\mu$ M)  | 0.21 ns                     | 1.19     |
| ACQ (10 $\mu$ M)+ Pd <sup>2+</sup> (80 $\mu$ M)  | 0.10 ns                     | 1.03     |
| ACQ (10 $\mu$ M)+ Pd <sup>2+</sup> (100 $\mu$ M) | 0.035 ns                    | 0.98     |

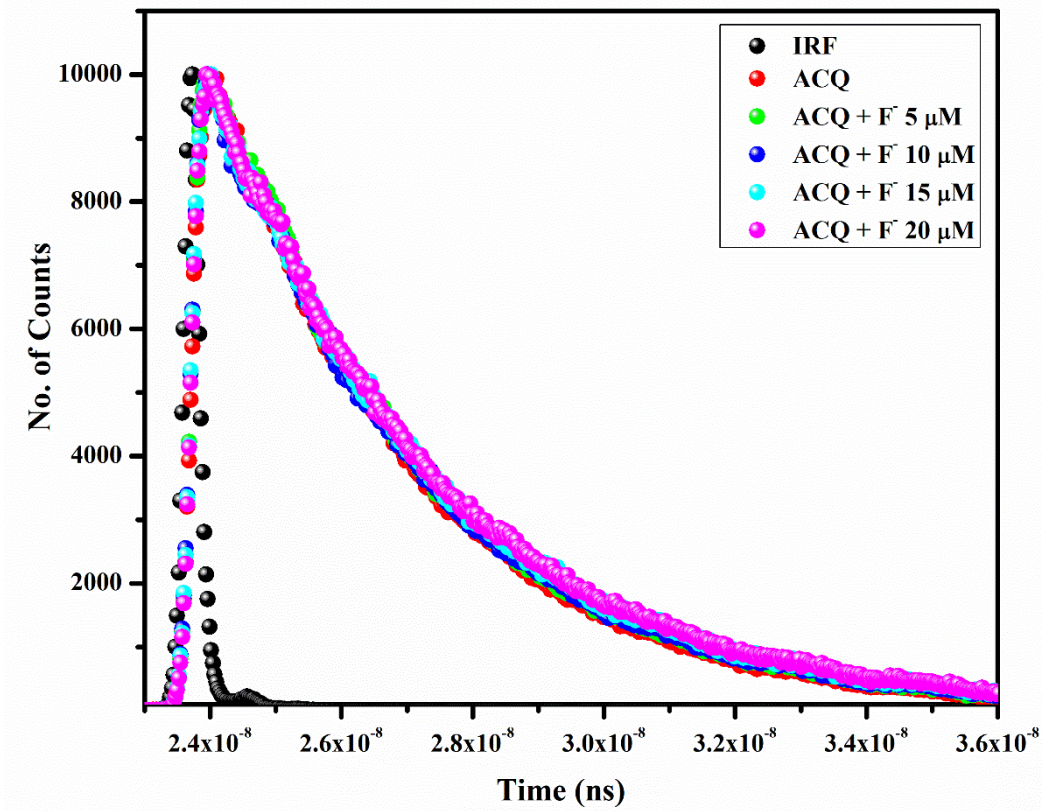

**Fig. S48** Time decay plot for ACQ and ACQ+F<sup>-</sup>

| Sample                                        | Average lifetime ( $\tau$ ) | $\chi^2$ |
|-----------------------------------------------|-----------------------------|----------|
| ACQ (10 $\mu$ M)                              | 3.10 ns                     | 1.16     |
| ACQ (10 $\mu$ M)+F <sup>-</sup> (5 $\mu$ M)   | 3.21 ns                     | 1.16     |
| ACQ (10 $\mu$ M)+ F <sup>-</sup> (10 $\mu$ M) | 3.27 ns                     | 1.14     |
| ACQ (10 $\mu$ M)+ F <sup>-</sup> (15 $\mu$ M) | 3.35 ns                     | 1.17     |
| ACQ (10 $\mu$ M)+ F <sup>-</sup> (20 $\mu$ M) | 3.39 ns                     | 1.18     |

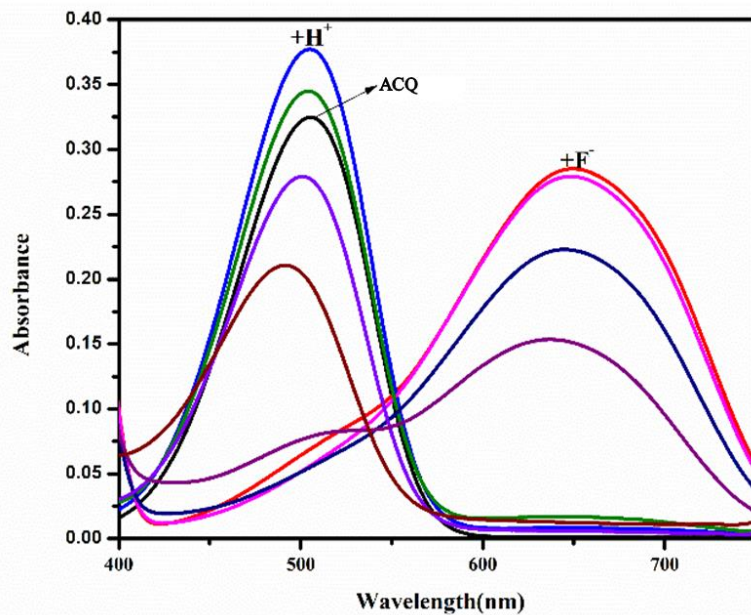

**Fig. S49** UV-vis spectra depicting reversibility of ACQ with alternative addition of F<sup>-</sup> (656 nm) and AcOH (505 nm).

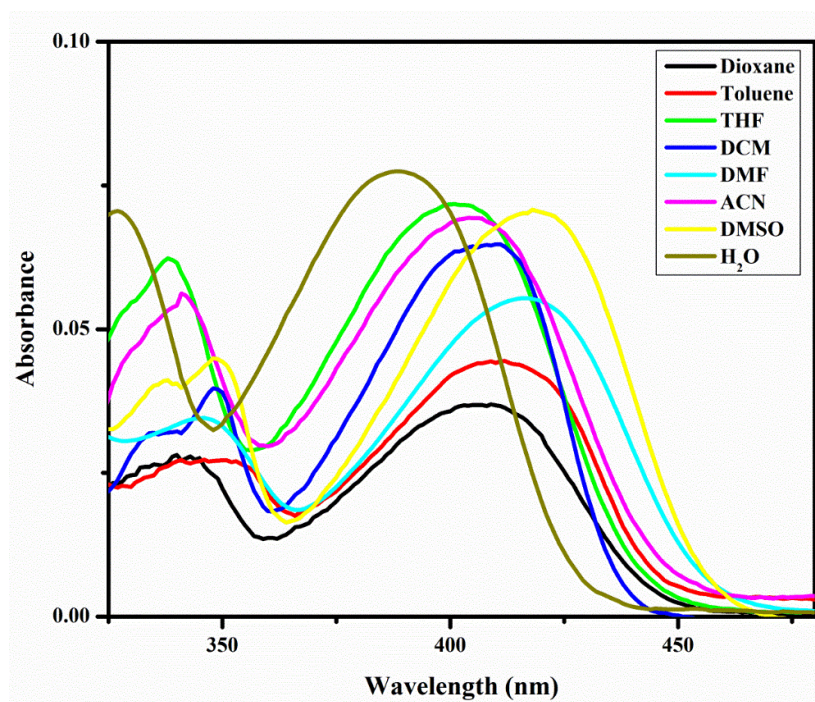

**Fig. S50** Absorption spectra in different solvents (10 μM) for AMQ.

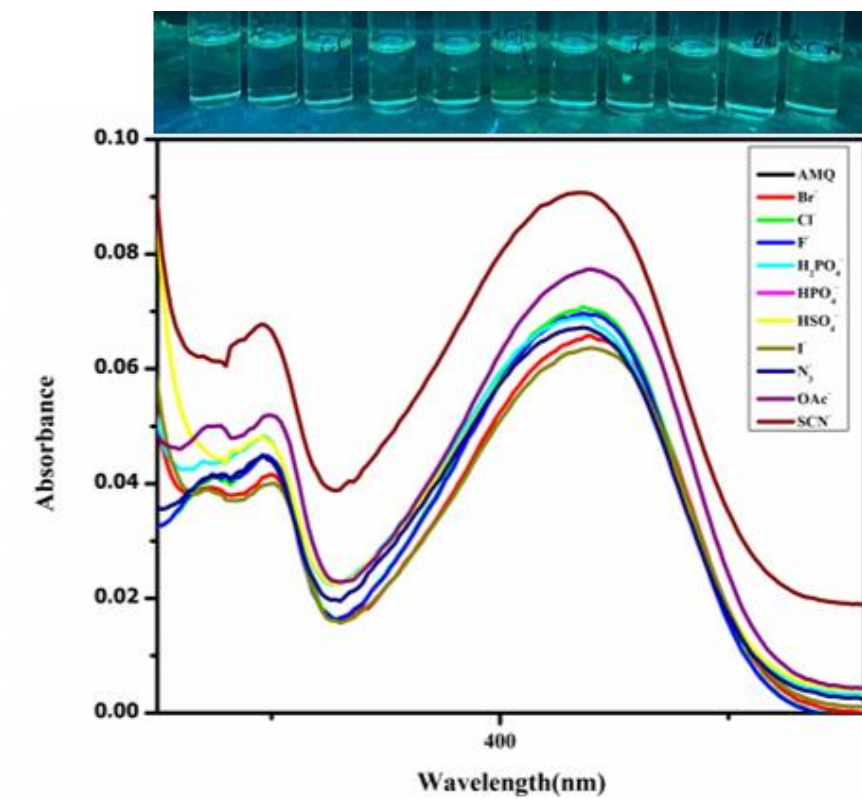

**Fig. S51** Absorbance spectra of AMQ (10 $\mu$ M) in the presence of various anions (50 $\mu$ M) in DMSO.

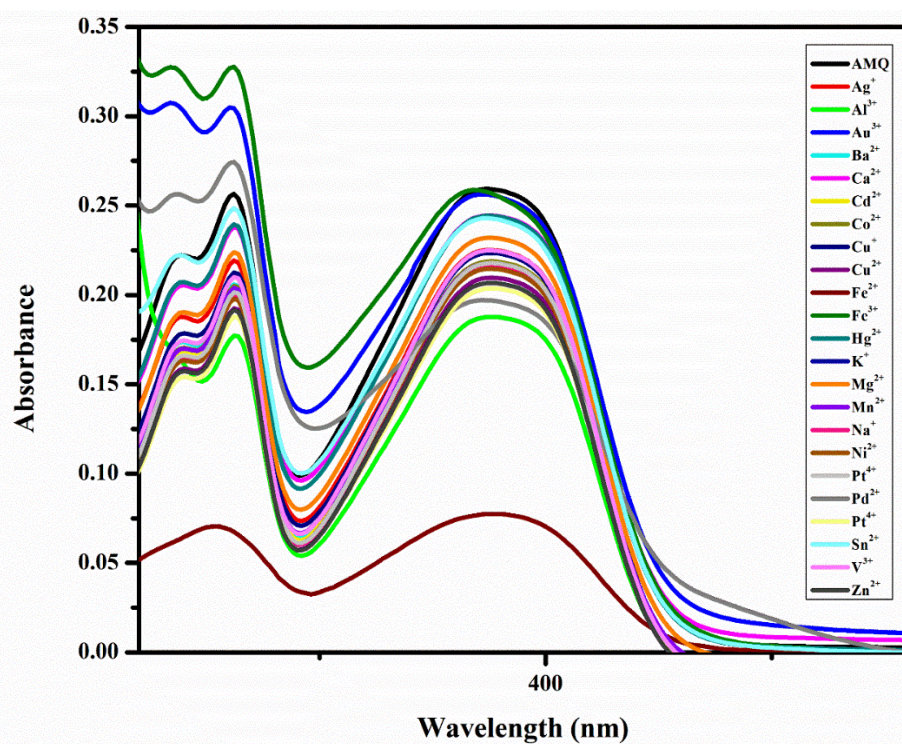

**Fig. S52** Absorbance spectra of AMQ (50 $\mu$ M) in the presence of various cations (1 mM) in H<sub>2</sub>O.

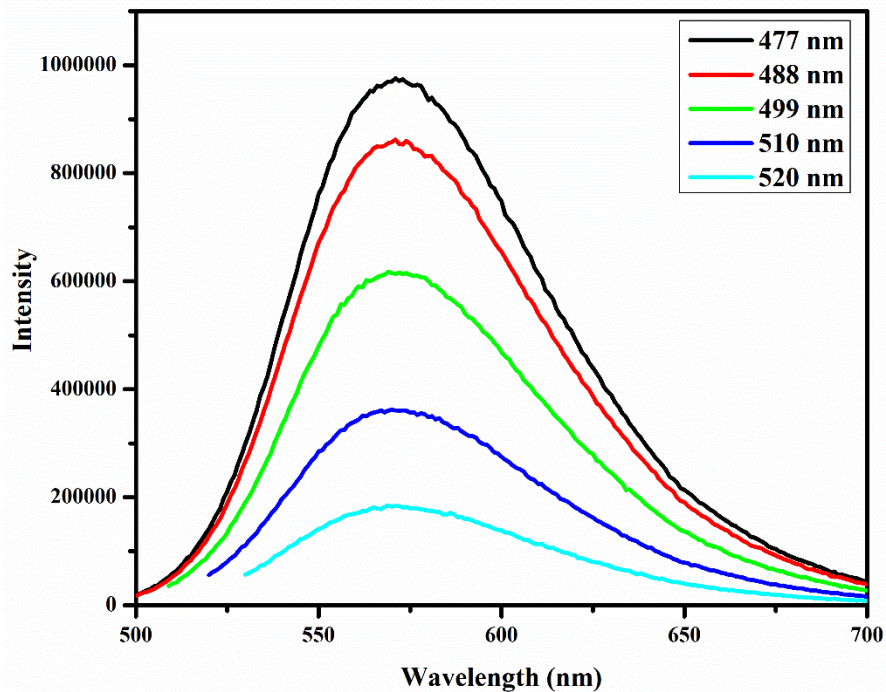

**Fig S53.** A plot of Intensity versus wavelength for ACQ (10  $\mu$ M) in H<sub>2</sub>O at different Excitation wavelengths.

### Cu<sup>2+</sup> Application

#### Preparation of artificial urine sample:

250mg urea, 29mg NaCl, 16mg KCl, 22.5mg Na<sub>2</sub>SO<sub>4</sub>, 14mg KH<sub>2</sub>PO<sub>4</sub>, 11mg creatinine, 10mg NH<sub>4</sub>Cl and 11mg CaCl<sub>2</sub>·H<sub>2</sub>O were dissolved in 10ml millipore water. <sup>[30]</sup>

#### Experimental Protocol:

20 $\mu$ L of the artificial urine solution in 2ml water was titrated by adding different concentrations of Cu<sup>2+</sup> (2-8  $\mu$ M for recording absorbance data and 0-4  $\mu$ M for obtaining Intensity versus concentration of Cu<sup>2+</sup> plot)

The values of slope ( $m= 0.00585$ ) and intercept ( $c=0.02084$ ) were taken from absorbance versus [Cu<sup>2+</sup>] calibration plot (**Fig. S49**).

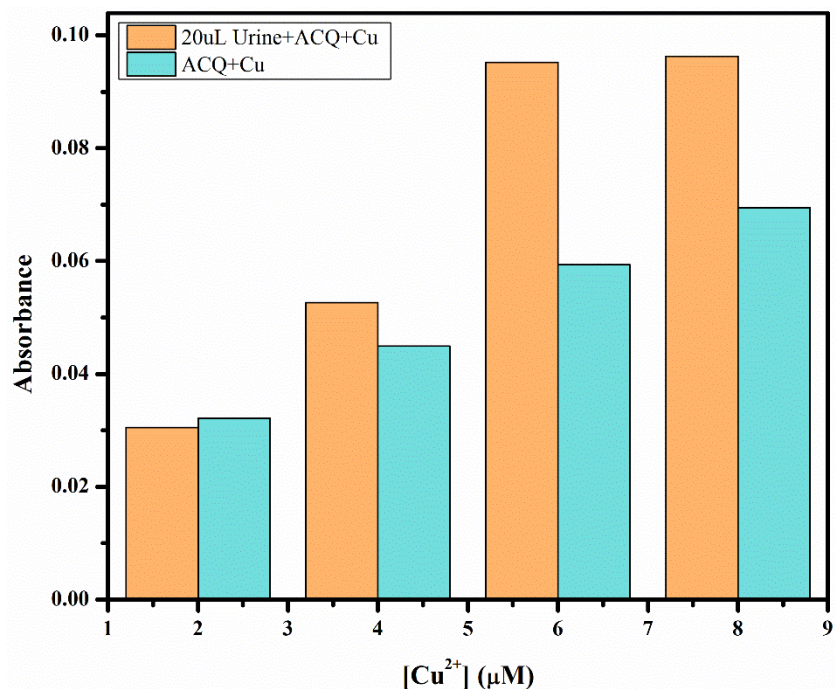

**Fig. S54** Bar graph for ACQ at 527nm obtained by titrating 20 μL samples of artificial urine with Cu<sup>2+</sup>(2-8 μM) in H<sub>2</sub>O.

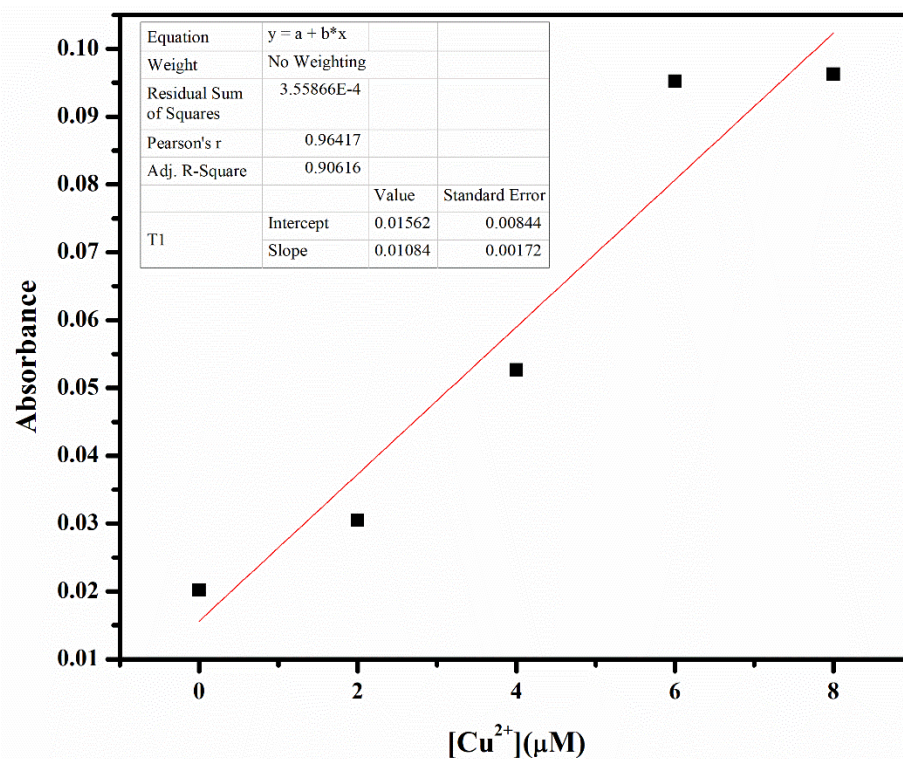

**Fig.S55** Absorbance versus [Cu<sup>2+</sup>] plot for ACQ+20μL artificial urine at different concentrations (2-8 μM) of Cu<sup>2+</sup> in H<sub>2</sub>O.



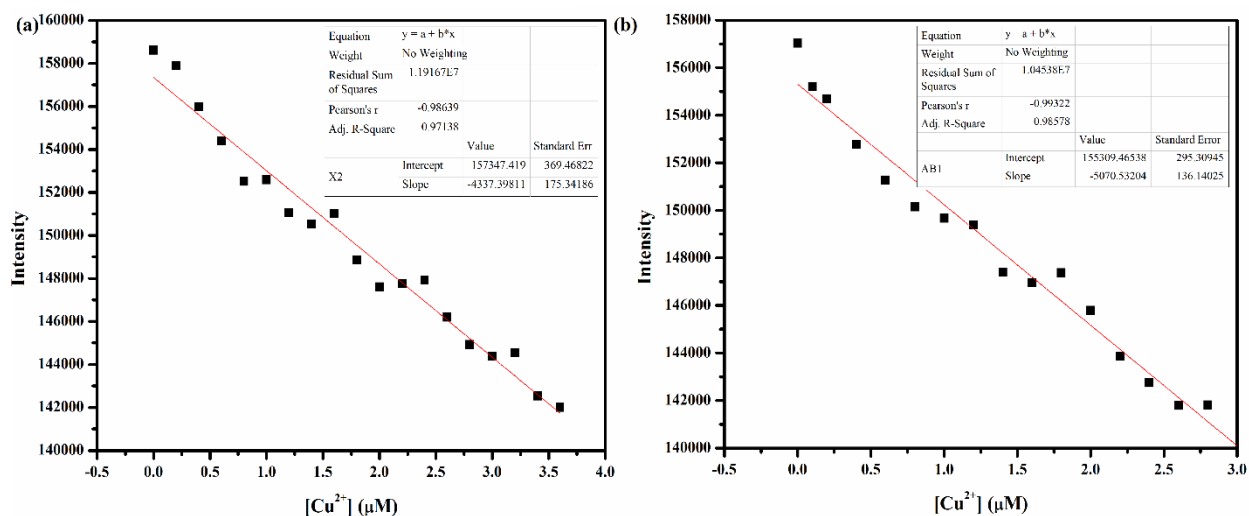

**Fig.S56** Intensity versus  $[Cu^{2+}]$  plot for (a) ACQ (b) and 20 $\mu$ L with different concentrations (0-3  $\mu$ M) of  $Cu^{2+}$  at 527 nm in  $H_2O$ .

**Remarks:** This experiment is performed to demonstrate the utility of probe ACQ in the quantitative detection of  $Cu^{2+}$  present in the urine of Wilson's disease patients and to show its potential for clinical applications. Even in the presence of all the components present in the urine sample the probe can efficiently be utilized for quantifying  $Cu^{2+}$  in Wilson's disease patients by using the above method.

### Pd<sup>2+</sup> Application

#### Experimental Protocol:

50 mg of all four drug samples Avomine, Dolo 650 and Meftal were dissolved in 3ml water and the solution was filtered. 2 $\mu$ L was taken from each of the solutions and titrated with Pd<sup>2+</sup> (20-100  $\mu$ M) and the obtained absorbances at the respective concentrations were tabulated and the corresponding bar graph was plotted.

**Inference:** After adding the drug samples along with the probe in water no peak at 527 nm was observed in UV. No Pd<sup>2+</sup> was found in any of the drug samples as indicated by the bar graph. However, after titrating the samples with Pd<sup>2+</sup> salt (0-40  $\mu$ M) which showed a gradual increase in absorbance at 527 nm which indicated that the concentration of Pd<sup>2+</sup> in the drug samples was below the detection limit of ACQ and the limit allowable for a Pd<sup>2+</sup> in drug

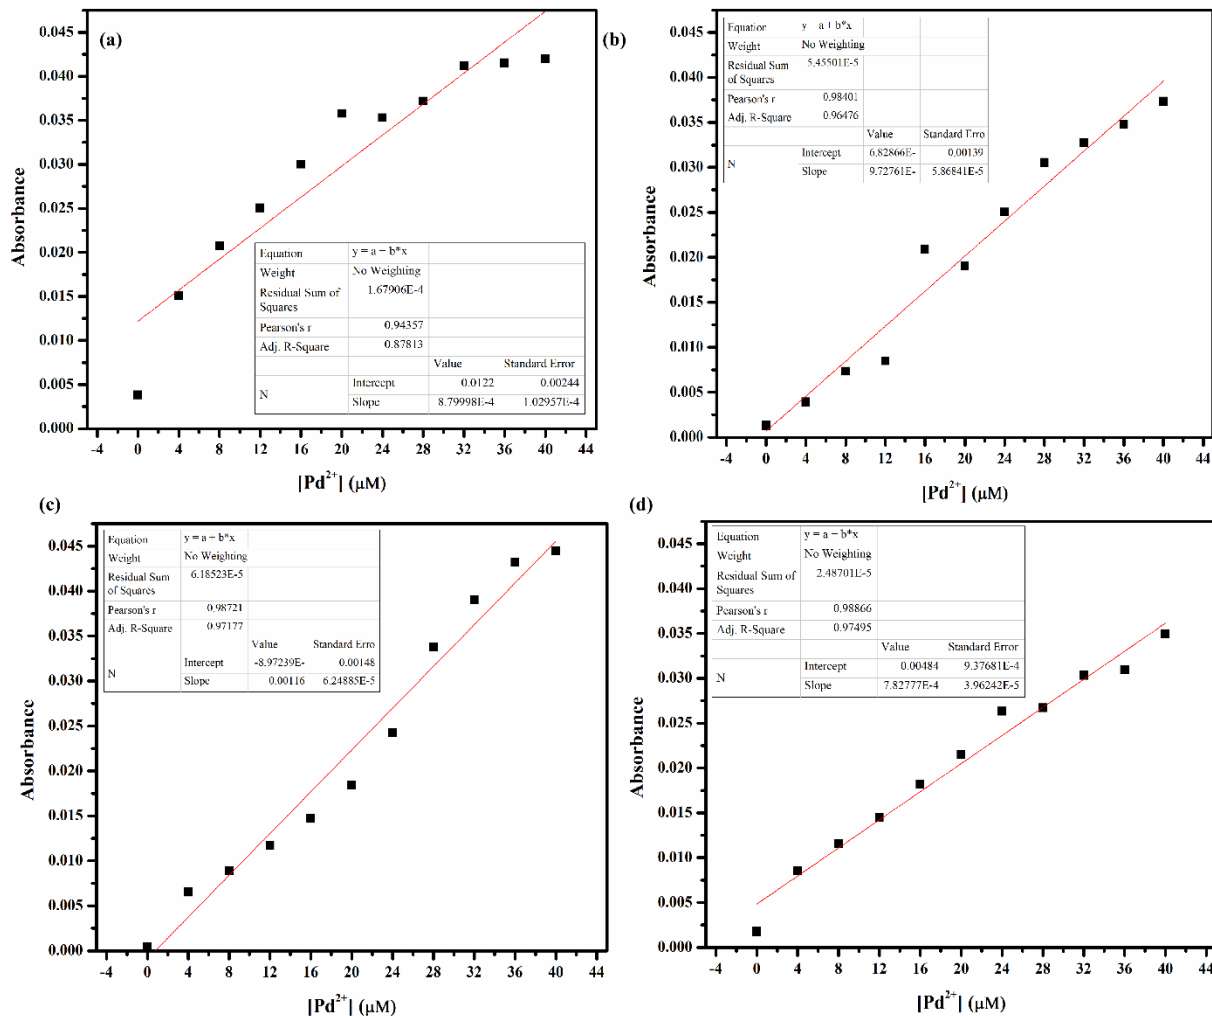

**Fig S57.** Scatter plots for (a)ACQ with  $Pd^{2+}$ (0-40  $\mu M$ ) along with (b) Avomine (c) Dolo 650 and (d) Meftal at 527 nm in  $H_2O$ .

**Table S4.** Absorbance values at 527 nm for various drug samples.

| $[Pd^{2+}]$ | Absorbance                 |                             |                           |                |
|-------------|----------------------------|-----------------------------|---------------------------|----------------|
|             | Avomine+<br>ACQ+ $Pd^{2+}$ | Dolo 650+<br>ACQ+ $Pd^{2+}$ | Meftal+<br>ACQ+ $Pd^{2+}$ | ACQ+ $Pd^{2+}$ |
| 4 $\mu M$   | 0.00394                    | 0.00654                     | 0.00854                   | 0.0151         |
| 8 $\mu M$   | 0.00733                    | 0.00893                     | 0.01159                   | 0.02078        |
| 12 $\mu M$  | 0.00851                    | 0.01169                     | 0.01448                   | 0.02508        |
| 16 $\mu M$  | 0.02093                    | 0.01471                     | 0.0182                    | 0.03003        |
| 20 $\mu M$  | 0.01906                    | 0.01844                     | 0.02149                   | 0.03582        |
| 24 $\mu M$  | 0.02505                    | 0.02428                     | 0.02634                   | 0.03529        |
| 28 $\mu M$  | 0.03054                    | 0.03376                     | 0.02674                   | 0.03718        |
| 32 $\mu M$  | 0.03272                    | 0.03904                     | 0.03034                   | 0.04119        |

|                  |         |         |         |         |
|------------------|---------|---------|---------|---------|
| 36 $\mu\text{M}$ | 0.03476 | 0.04324 | 0.03097 | 0.04154 |
| 40 $\mu\text{M}$ | 0.03738 | 0.04448 | 0.03494 | 0.04199 |

### F<sup>-</sup> Application

#### Experimental Protocol:

100 mg of toothpaste samples Colgate, Pepsodent and Sensodyne were weighed and dissolved in 5 ml DMSO.

10  $\mu\text{L}$  of the solution in 2ml DMSO was titrated by adding different concentrations of F<sup>-</sup> (2-8  $\mu\text{M}$ ) and the obtained values were used to determine the concentration of fluoride by using the equation

$$x = \frac{y - c}{m}$$

The values of slope ( $m = 0.00397$ ) and intercept ( $c = 0.01349$ ) were taken from absorbance versus [F<sup>-</sup>] calibration plot (Fig. S52).

**Remarks:** The outcomes obtained indicate that ACQ is potentially useful for the quantification of F in toothpaste samples. The amount of fluoride recovered in each of the samples is tabulated below (Table S5).

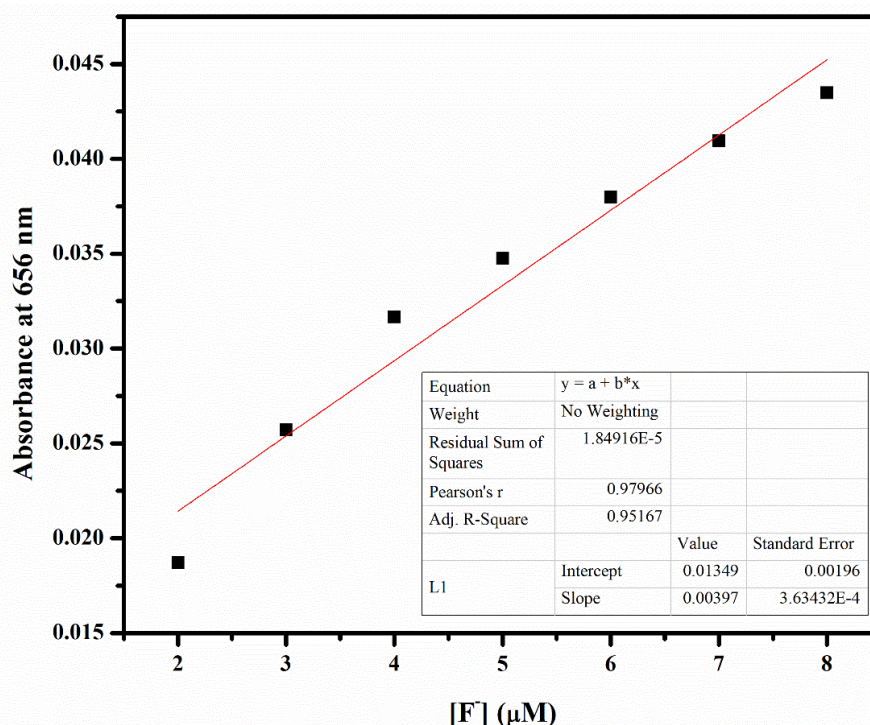

**Fig S58.** Absorbance versus [F<sup>-</sup>] plot for ACQ at different concentrations of F<sup>-</sup> in DMSO.

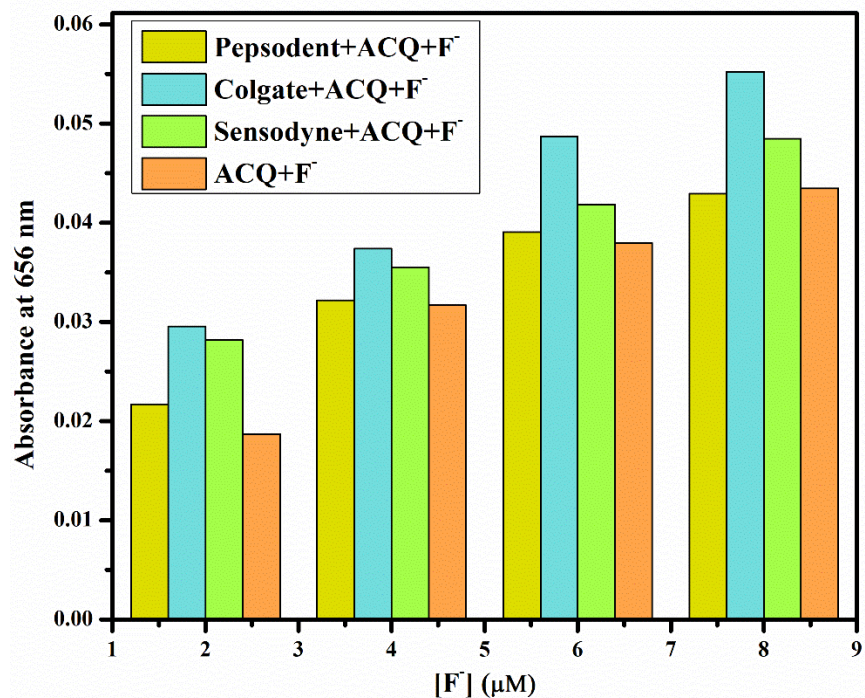

**Fig S59.** Bar graph for ACQ at 656 nm obtained by titrating toothpaste samples with  $F^-$  (2-8  $\mu M$ ) in DMSO.

**Table S5.** Calculated parameters from the obtained experimental values for quantifying  $F^-$  in different toothpaste samples.

| Absorbance of ACQ+F <sup>-</sup> at z | [F <sup>-</sup> ] (z) | Absorbance of Colgate +ACQ+ [F <sup>-</sup> ] (z) | x <sub>colgate</sub> | Concentration found in Sample (x <sub>colgate</sub> -z) |
|---------------------------------------|-----------------------|---------------------------------------------------|----------------------|---------------------------------------------------------|
| 0.01871                               | 2 $\mu M$             | 0.02956                                           | 4.04 $\mu M$         | 2.04 $\mu M$                                            |
| 0.03168                               | 4 $\mu M$             | 0.0374                                            | 6.02 $\mu M$         | 2.02 $\mu M$                                            |
| 0.03798                               | 6 $\mu M$             | 0.0487                                            | 8.87 $\mu M$         | 2.86 $\mu M$                                            |
| 0.04348                               | 8 $\mu M$             | 0.05521                                           | 10.5 $\mu M$         | 2.50 $\mu M$                                            |

| Absorbance of ACQ+F <sup>-</sup> at z | [F <sup>-</sup> ] (z) | Absorbance of Pepsodent +ACQ+ [F <sup>-</sup> ] (z) | x <sub>pepsodent</sub> | Concentration found in Sample (x <sub>pepsodent</sub> -z) |
|---------------------------------------|-----------------------|-----------------------------------------------------|------------------------|-----------------------------------------------------------|
| 0.01871                               | 2 $\mu M$             | 0.0217                                              | 2.0689                 | 0.068 $\mu M$                                             |
| 0.03168                               | 4 $\mu M$             | 0.0322                                              | 4.7128                 | 0.71 $\mu M$                                              |
| 0.03798                               | 6 $\mu M$             | 0.03907                                             | 6.4433                 | 0.44 $\mu M$                                              |
| 0.04348                               | 8 $\mu M$             | 0.04293                                             | 7.415                  | -0.59 $\mu M$                                             |

| Absorbance of ACQ+F <sup>-</sup> at z | [F <sup>-</sup> ] (z) | Absorbance of Sensodyne +ACQ+ [F <sup>-</sup> ] (z) | x <sub>sensodyne</sub> | Concentration found in Sample (x <sub>sensodyne</sub> -z) |
|---------------------------------------|-----------------------|-----------------------------------------------------|------------------------|-----------------------------------------------------------|
| 0.01871                               | 2 $\mu M$             | 0.02818                                             | 3.7002                 | 1.70 $\mu M$                                              |
| 0.03168                               | 4 $\mu M$             | 0.03551                                             | 5.546                  | 1.54 $\mu M$                                              |
| 0.03798                               | 6 $\mu M$             | 0.04183                                             | 7.138                  | 1.13 $\mu M$                                              |
| 0.04348                               | 8 $\mu M$             | 0.04846                                             | 8.8085                 | 0.80 $\mu M$                                              |

**Table S6** Examples of previously reported colorimetric and fluorescence-based Cu<sup>2+</sup> sensors

| Sensor                                                                              | Detection Limit | Solvent                   | Reference |
|-------------------------------------------------------------------------------------|-----------------|---------------------------|-----------|
| 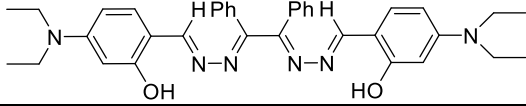   | 0.73 nM         | MeOH/<br>H <sub>2</sub> O | [10]      |
|    | -               | MeOH                      | [11]      |
|    | 0.503 μM        | MeCN/<br>H <sub>2</sub> O | [12]      |
|    | 0.102 μM        | EtOH/H<br>EPES<br>buffer  | [13]      |
|   | -               | DNF/<br>HEPES<br>buffer   | [14]      |
|  | 0.11 μM         | EtOH                      | [15]      |
|  | 5.6 ppb         | HEPES<br>buffer           | [16]      |

**Table S7** Examples of previously reported colorimetric and fluorescence-based Pd<sup>2+</sup> sensors

| Sensor                                                                              | Detection Limit | Solvent                 | Reference |
|-------------------------------------------------------------------------------------|-----------------|-------------------------|-----------|
| 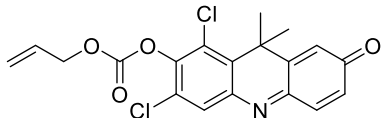 | 2.2 nM          | PBS<br>buffer &<br>DMSO | [17]      |

|                                                                                   |                     |                                  |      |
|-----------------------------------------------------------------------------------|---------------------|----------------------------------|------|
| 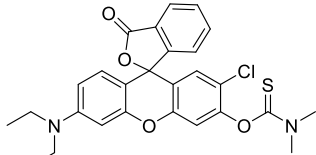 | 0.01 $\mu\text{M}$  | DMSO                             | [18] |
|  | 41.5 nM             | EtOH/H <sub>2</sub> O            | [19] |
|  | 0.26 $\mu\text{M}$  | PBS buffer & DMSO                | [20] |
|  | 0.089 $\mu\text{M}$ | H <sub>2</sub> O                 | [21] |
|  | 10 ppb              | Tween-20 neutral micellar medium | [22] |

**Table S8** Examples of previously reported colorimetric and fluorescence-based F<sup>-</sup>sensors.

| Sensor                                                                              | Detection Limit    | Solvent         | Mechanism                                               | Reference |
|-------------------------------------------------------------------------------------|--------------------|-----------------|---------------------------------------------------------|-----------|
| 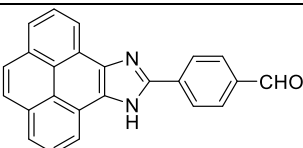 | -                  | DMSO<br>Acetone | ICT<br>Hydrogen Bonding                                 | [1]       |
|  | 5.27 $\mu\text{M}$ | DMSO            | Desilylation                                            | [2]       |
|  | 3.8 $\mu\text{M}$  | Dioxane         | Desilylation                                            | [3]       |
|  | 8.6 nM             | THF             | hydrogen-bonding interactions followed by deprotonation | [4]       |

|                                                                                    |                     |      |                  |     |
|------------------------------------------------------------------------------------|---------------------|------|------------------|-----|
| 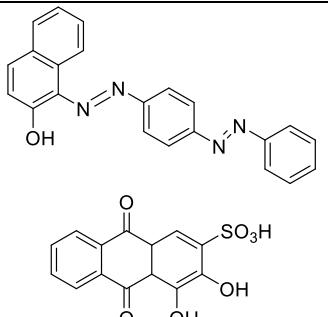  | -                   | -    | Deprotonation    | [5] |
|   | 0.495 $\mu\text{M}$ | THF  | Deprotonation    | [6] |
|   | 14.2 $\mu\text{M}$  | DMSO | Deprotonation    | [7] |
|   | -                   | THF  | ESIPT inhibition | [8] |
|  | 19 $\mu\text{M}$    | THF  | Dianion (ICT)    | [9] |

**Table S9** Examples of previously reported molecules with N-oxide group used for fluorescence studies.

| Sensor                                                                               | Reference |
|--------------------------------------------------------------------------------------|-----------|
| 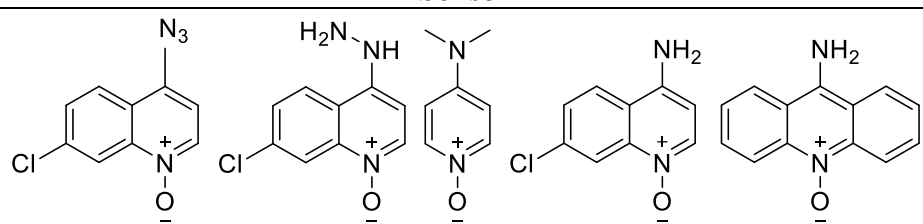 | [23]      |
|   | [24]      |

|                                                                                     |      |
|-------------------------------------------------------------------------------------|------|
| 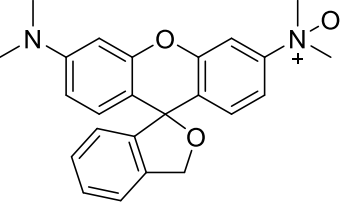   | [25] |
|    | [26] |
|  | [27] |
|  | [28] |
|  | [29] |



## References:

1. Tabasi, Z. A., Younes, E. A., Walsh, J. C., Thompson, D. W., Bodwell, G. J., & Zhao, Y. (2018). Pyrenoimidazolyl-benzaldehyde fluorophores: synthesis, properties, and sensing function for fluoride anions. *ACS omega*, 3(11), 16387-16397.
2. Zheng, X., Zhu, W., Ai, H., Huang, Y., & Lu, Z. (2016). A rapid response colorimetric and ratiometric fluorescent sensor for detecting fluoride ion, and its application in real sample analysis. *Tetrahedron Letters*, 57(52), 5846-5849.
3. Zhou, X., Lai, R., Li, H., & Stains, C. I. (2015). The 8-silyloxyquinoline scaffold as a versatile platform for the sensitive detection of aqueous fluoride. *Analytical chemistry*, 87(8), 4081-4086.
4. Mondal, S., Gupta, P., Rahaman, F., Gautam, P., & Lekshmi, I. C. (2022). Colorimetric and fluorimetric detection of fluoride ion using thiazole derived receptor. *Spectrochimica Acta Part A: Molecular and Biomolecular Spectroscopy*, 264, 120301.
5. Kumar, P., Sakla, R., Ghosh, A., & Jose, D. A. (2017). Reversible colorimetric sensor for moisture detection in organic solvents and application in inkless writing. *ACS applied materials & interfaces*, 9(30), 25600-25605.
6. Mu, M., Ke, X., Cheng, W., Li, J., Ji, C., & Yin, M. (2022). Perylenemonoimide-Based Colorimetric Probe with High Contrast for Naked-Eye Detection of Fluoride Ions. *Analytical Chemistry*, 94(33), 11470-11475.
7. Zheng, X., Zhu, W., Liu, D., Ai, H., Huang, Y., & Lu, Z. (2014). Highly selective colorimetric/fluorometric dual-channel fluoride ion probe, and its capability of differentiating cancer cells. *ACS applied materials & interfaces*, 6(11), 7996-8000.
8. Nakane, Y., Takeda, T., Hoshino, N., Sakai, K. I., & Akutagawa, T. (2015). Cation–anion dual sensing of a fluorescent quinoxalinone derivative using lactam–lactim tautomerism. *The Journal of Physical Chemistry A*, 119(24), 6223-6231.
9. Akula, M., Thigulla, Y., Nag, A., & Bhattacharya, A. (2015). Selective detection of fluoride using fused quinoline systems: effect of pyrrole. *RSC advances*, 5(70), 57231-57234.
10. Chandra, R., Ghorai, A., & Patra, G. K. (2018). A simple benzildihydrazone derived colorimetric and fluorescent ‘on–off-on’ sensor for sequential detection of copper (II) and cyanide ions in aqueous solution. *Sensors and Actuators B: Chemical*, 255, 701-711.
11. Mergu, N., & Gupta, V. K. (2015). A novel colorimetric detection probe for copper (II) ions based on a Schiff base. *Sensors and actuators B: Chemical*, 210, 408-417.
12. Dalbera, S., Kulovi, S., & Dalai, S. (2018). Pyrene-based Schiff Base as Selective Chemosensor for Copper (II) and Sulfide Ions. *ChemistrySelect*, 3(23), 6561-6569.
13. Chen, D., Chen, P., Zong, L., Sun, Y., Liu, G., Yu, X., & Qin, J. (2017). Colorimetric and fluorescent probes for real-time naked eye sensing of copper ion in solution and on paper substrate. *Royal Society open science*, 4(11), 171161.
14. Wang, Y., Feng, H., Li, H., Yang, X., Jia, H., Kang, W., ... & Zhang, R. (2020). A Copper (II) Ensemble-Based Fluorescence Chemosensor and Its Application in the ‘Naked–Eye’ Detection of Biothiols in Human Urine. *Sensors*, 20(5), 1331.
15. Trevino, K. M., Tautges, B. K., Kapre, R., Franco Jr, F. C., Or, V. W., Balmond, E. I., ... & Louie, A. Y. (2021). Highly sensitive and selective spiropyran-based sensor for Copper (II) quantification. *ACS omega*, 6(16), 10776-10789.
16. Sakunkaewkasem, S., Petdum, A., Panchan, W., Sirirak, J., Charoenpanich, A., Sooksimuang, T., & Wanichacheva, N. (2018). Dual-analyte fluorescent sensor based on [5] helicene derivative with super large stokes shift for the selective determinations of Cu<sup>2+</sup> or Zn<sup>2+</sup> in buffer solutions

and its application in a living cell. *ACS sensors*, 3(5), 1016-1023.

17. Xia, Q., Feng, S., Liu, D., & Feng, G. (2018). A highly selective and sensitive colorimetric and near-infrared fluorescent turn-on probe for rapid detection of palladium in drugs and living cells. *Sensors and Actuators B: Chemical*, 258, 98-104.

18. Choi, M. G., Seo, J. Y., Cho, E. J., & Chang, S. K. (2022). Colorimetric analysis of palladium using thiocarbamate hydrolysis and its application for detecting residual palladium in drugs. *Journal of Photochemistry and Photobiology A: Chemistry*, 429, 113920.

19. Chen, X., Wang, H., Ma, X., Wang, M., Zhang, Y., Gao, G., ... & Hou, S. (2018). Colorimetric and fluorescent probe for real-time detection of palladium (II) ion in aqueous medium and live cell imaging. *Dyes and Pigments*, 148, 286-291.

20. Wang, L., Zheng, X. Y., Zhang, X., & Zhu, Z. J. (2021). A quinoline-based fluorescent chemosensor for palladium ion ( $\text{Pd}^{2+}$ )-selective detection in aqueous solution. *Spectrochimica Acta Part A: Molecular and Biomolecular Spectroscopy*, 249, 119283.

21. Lei, W. A. N. G., Wan-Yu, Z. H. U., & ZHANG, X. (2022). Selective and sensitive fluorescence detection of Pd (II) in 100% water and imaging application in living cells. *Chinese Journal of Analytical Chemistry*, 50(12), 100155.

22. Baig, M. Z. K., Pawar, S., Tulichala, R. P., Nag, A., & Chakravarty, M. (2017). A single fluorescent probe as systematic sensor for multiple metal ions: Focus on detection and bio-imaging of  $\text{Pd}^{2+}$ . *Sensors and Actuators B: Chemical*, 243, 226-233.

23. Ma, Z., Li, J., Lin, K., Ramachandran, M., Li, M., & Li, Y. (2020). Heterocyclic N-Oxides as Small-Molecule Fluorogenic Scaffolds: Rational Design and Applications of Their “On–Off” Fluorescence. *Analytical chemistry*, 92(18), 12282-12289.

24. Hirayama, T., Okuda, K., & Nagasawa, H. (2013). A highly selective turn-on fluorescent probe for iron (II) to visualize labile iron in living cells. *Chemical science*, 4(3), 1250-1256.

25. Niwa, M., Hirayama, T., Okuda, K., & Nagasawa, H. (2014). A new class of high-contrast Fe (II) selective fluorescent probes based on spirocyclized scaffolds for visualization of intracellular labile iron delivered by transferrin. *Organic & biomolecular chemistry*, 12(34), 6590-6597.

26. Reddy, C. R., Aila, M., Sathish, P., Mrinalini, M., Giribabu, L., Prasanthkumar, S., & Grée, R. (2019). Metal-free propargylation/aza-annulation approach to substituted  $\beta$ -carboline and evaluation of their photophysical properties. *Organic & Biomolecular Chemistry*, 17(42), 9291-9304.

27. Hirayama, T., Tsuboi, H., Niwa, M., Miki, A., Kadota, S., Ikeshita, Y., ... & Nagasawa, H. (2017). A universal fluorogenic switch for Fe (ii) ion based on N-oxide chemistry permits the visualization of intracellular redox equilibrium shift towards labile iron in hypoxic tumor cells. *Chemical science*, 8(7), 4858-4866.

28. Sedenkova, K. N., Kolodyazhnaya, J. V., Vasilenko, D. A., Gracheva, Y. A., Kharitonoshvili, E. V., Grishin, Y. K., ... & Averina, E. B. (2019). Novel  $\pi$ -conjugated systems based on pyrimidine N-Oxide. *Dyes and Pigments*, 164, 72-81.

29. Knox, H. J., Hedhli, J., Kim, T. W., Khalili, K., Dobrucki, L. W., & Chan, J. (2017). A bioreducible N-oxide-based probe for photoacoustic imaging of hypoxia. *Nature communications*, 8(1), 1-9.

**Preparation of artificial urine sample:** Chandran, N., Janardhanan, P., Bayal, M., Pilankatta, R., & Nair, S. S. (2022). Development of a paper printed colorimetric sensor based on Cu-Curcumin nanoparticles for evolving point-of-care clinical diagnosis of sodium. *Scientific reports*, 12(1), 1-15.

**exp\_1179\_2NH-NH2****Table 1 Crystal data and structure refinement for exp\_1179\_2NH-NH2.**[CCDC No. 2194801]

Identification code exp\_1179\_2NH-NH2  
 Empirical formula C<sub>9</sub>H<sub>6</sub>N<sub>4</sub>O<sub>2</sub>  
 Formula weight 202.18  
 Temperature/K 293(2)  
 Crystal system monoclinic  
 Space group P21/c  
 a/Å 4.89130(10)  
 b/Å 9.7299(2)  
 c/Å 17.6911(4)  
 α/° 90  
 β/° 95.712(2)  
 γ/° 90  
 Volume/Å<sup>3</sup> 837.77(3)  
 Z 4  
 ρ<sub>calc</sub>/cm<sup>3</sup> 1.603  
 μ/mm 1 1.009  
 F(000) 416.0  
 Crystal size/mm<sup>3</sup> 0.2 × 0.1 × 0.1  
 Radiation CuKα (λ = 1.54184)  
 2θ range for data collection/° 10.05 to 159.082  
 Index ranges -3 ≤ h ≤ 6, -12 ≤ k ≤ 12, -22 ≤ l ≤ 20  
 Reflections collected 4265  
 Independent reflections 1751 [R<sub>int</sub> = 0.0227, R<sub>sigma</sub> = 0.0339]  
 Data/restraints/parameters 1751/0/141  
 Goodness-of-fit on F<sup>2</sup> 1.100  
 Final R indexes [I ≥ 2σ (I)] R<sub>1</sub> = 0.0416, wR<sub>2</sub> = 0.1115  
 Final R indexes [all data] R<sub>1</sub> = 0.0445, wR<sub>2</sub> = 0.1148  
 Largest diff. peak/hole / e Å<sup>-3</sup> 0.21/-0.34

**Table 2 Fractional Atomic Coordinates (×10<sup>4</sup>) and Equivalent Isotropic Displacement Parameters (Å<sup>2</sup>×10<sup>3</sup>) for exp\_1179\_2NH-NH2. U<sub>eq</sub> is defined as 1/3 of of the trace of the orthogonalised UIJ tensor.**

| Atom | x       | y          | z         | U(eq)   |
|------|---------|------------|-----------|---------|
| O1O  | 1630(2) | 2293.6(10) | 7220.4(6) | 30.8(3) |
| O2O  | 7234(2) | 5927.5(11) | 5682.9(6) | 30.0(3) |
| N1N  | 5868(2) | 5049.1(11) | 6030.3(6) | 22.1(3) |
| N2N  | 2956(3) | 8035.9(12) | 6639.5(7) | 31.4(3) |
| N3N  | 651(2)  | 4857.2(12) | 7375.7(7) | 25.0(3) |
| N4N  | 2982(2) | 3154.4(11) | 6827.6(6) | 22.0(3) |
| C1C  | 5169(3) | 1279.9(14) | 6233.8(8) | 26.7(3) |
| C2C  | 7002(3) | 841.5(15)  | 5747.2(8) | 31.8(3) |

|     |         |            |           |         |
|-----|---------|------------|-----------|---------|
| C3C | 8483(3) | 1785.5(16) | 5347.7(8) | 32.5(3) |
| C4C | 8148(3) | 3174.0(15) | 5437.5(8) | 27.5(3) |
| C5C | 3988(3) | 5462.8(13) | 6496.1(7) | 21.4(3) |
| C6C | 3526(3) | 6906.7(14) | 6561.8(7) | 23.6(3) |
| C7C | 2513(3) | 4513.3(13) | 6910.9(7) | 20.8(3) |
| C8C | 4803(2) | 2696.8(13) | 6336.5(7) | 21.7(3) |
| C9C | 6286(3) | 3641.6(13) | 5935.1(7) | 22.3(3) |

**Table 3 Anisotropic Displacement Parameters ( $\text{\AA}^2 \times 10^3$ ) for exp\_1179\_2NH-NH2. The Anisotropic displacement factor exponent takes the form:  $-2\pi^2[h2a^*2U11+2hka^*b^*U12+\dots]$ .**

| Atom | U11     | U22     | U33     | U23     | U13     | U12     |
|------|---------|---------|---------|---------|---------|---------|
| O1O  | 35.1(5) | 21.3(5) | 38.6(6) | 1.5(4)  | 16.3(4) | -8.1(4) |
| O2O  | 29.7(5) | 28.8(5) | 33.4(5) | 8.4(4)  | 13.2(4) | -2.3(4) |
| N1N  | 21.0(5) | 23.5(6) | 22.4(5) | 2.5(4)  | 5.2(4)  | -0.8(4) |
| N2N  | 37.6(7) | 22.6(6) | 35.6(6) | 0.5(5)  | 11.6(5) | -0.4(5) |
| N3N  | 28.0(6) | 19.7(5) | 29.2(6) | -1.6(4) | 12.1(4) | -2.2(4) |
| N4N  | 22.3(5) | 19.6(5) | 24.8(5) | 0.0(4)  | 6.0(4)  | -2.7(4) |
| C1C  | 27.4(6) | 22.5(6) | 29.7(7) | -2.7(5) | 1.4(5)  | 1.1(5)  |
| C2C  | 34.2(7) | 27.2(7) | 33.5(7) | -6.9(6) | 0.5(6)  | 7.7(6)  |
| C3C  | 31.0(7) | 39.0(8) | 27.9(7) | -6.3(6) | 5.3(5)  | 11.8(6) |
| C4C  | 25.1(6) | 34.4(7) | 23.5(6) | 1.2(5)  | 5.8(5)  | 4.1(5)  |
| C5C  | 21.4(6) | 20.4(6) | 23.0(6) | -0.7(5) | 4.7(5)  | -0.2(5) |
| C6C  | 24.2(6) | 22.8(7) | 24.8(6) | 1.1(5)  | 6.8(5)  | -2.0(5) |
| C7C  | 20.9(6) | 19.9(6) | 22.0(6) | -1.7(4) | 3.6(5)  | -0.7(5) |
| C8C  | 20.5(6) | 22.6(6) | 22.0(6) | -2.0(5) | 1.9(5)  | 0.9(5)  |
| C9C  | 21.6(6) | 23.9(6) | 21.5(6) | -0.5(5) | 2.3(5)  | 2.3(5)  |

**Table 4 Bond Lengths for exp\_1179\_2NH-NH2.**

| Atom | Atom | Length/ $\text{\AA}$ | Atom | Atom | Length/ $\text{\AA}$ |
|------|------|----------------------|------|------|----------------------|
| O1O  | N4N  | 1.3088(14)           | C1C  | C2C  | 1.371(2)             |
| O2O  | N1N  | 1.2793(14)           | C1C  | C8C  | 1.4044(18)           |
| N1N  | C5C  | 1.3558(16)           | C2C  | C3C  | 1.403(2)             |
| N1N  | C9C  | 1.3973(17)           | C3C  | C4C  | 1.372(2)             |
| N2N  | C6C  | 1.1451(18)           | C4C  | C9C  | 1.4041(18)           |
| N3N  | C7C  | 1.3294(16)           | C5C  | C6C  | 1.4295(18)           |
| N4N  | C7C  | 1.3525(16)           | C5C  | C7C  | 1.4203(18)           |
| N4N  | C8C  | 1.3784(17)           | C8C  | C9C  | 1.4064(18)           |

**Table 5 Bond Angles for exp\_1179\_2NH-NH2.**

| Atom | Atom | Atom | Angle/ $^\circ$ | Atom | Atom | Atom | Angle/ $^\circ$ |
|------|------|------|-----------------|------|------|------|-----------------|
| O2O  | N1N  | C5C  | 120.80(11)      | C7C  | C5C  | C6C  | 120.32(12)      |
| O2O  | N1N  | C9C  | 120.48(11)      | N2N  | C6C  | C5C  | 174.27(14)      |
| C5C  | N1N  | C9C  | 118.71(11)      | N3N  | C7C  | N4N  | 116.58(12)      |
| O1O  | N4N  | C7C  | 117.88(11)      | N3N  | C7C  | C5C  | 124.77(12)      |
| O1O  | N4N  | C8C  | 121.34(11)      | N4N  | C7C  | C5C  | 118.64(11)      |
| C7C  | N4N  | C8C  | 120.77(11)      | N4N  | C8C  | C1C  | 119.83(12)      |

|     |     |     |            |     |     |     |            |
|-----|-----|-----|------------|-----|-----|-----|------------|
| C2C | C1C | C8C | 119.11(13) | N4N | C8C | C9C | 120.34(12) |
| C1C | C2C | C3C | 121.00(13) | C1C | C8C | C9C | 119.83(12) |
| C4C | C3C | C2C | 120.83(13) | N1N | C9C | C4C | 120.32(12) |
| C3C | C4C | C9C | 118.95(13) | N1N | C9C | C8C | 119.40(11) |
| N1N | C5C | C6C | 117.61(12) | C4C | C9C | C8C | 120.28(13) |
| N1N | C5C | C7C | 122.07(12) |     |     |     |            |

**Table 6 Torsion Angles for exp\_1179\_2NH-NH2.**

| A   | B   | C   | D          | Angle/°     | A   | B   | C   | D   | Angle/°     |
|-----|-----|-----|------------|-------------|-----|-----|-----|-----|-------------|
| O1O | N4N | C7C | N3N        | -1.60(17)   | C2C | C1C | C8C | C9C | 0.73(19)    |
| O1O | N4N | C7C | C5C        | 179.23(11)  | C2C | C3C | C4C | C9C | -0.2(2)     |
| O1O | N4N | C8C | C1C        | 1.95(18)    | C3C | C4C | C9C | N1N | -179.04(12) |
| O1O | N4N | C8C | C9C        | -178.33(11) | C3C | C4C | C9C | C8C | 0.3(2)      |
| O2O | N1N | C5C | C6C        | 2.16(17)    | C5C | N1N | C9C | C4C | 177.84(11)  |
| O2O | N1N | C5C | C7C        | -177.63(11) | C5C | N1N | C9C | C8C | -1.51(18)   |
| O2O | N1N | C9C | C4C        | -2.06(18)   | C6C | C5C | C7C | N3N | 0.1(2)      |
| O2O | N1N | C9C | C8C        | 178.59(10)  | C6C | C5C | C7C | N4N |             |
|     |     |     | 179.25(10) |             |     |     |     |     |             |
| N1N | C5C | C7C | N3N        | 179.94(12)  | C7C | N4N | C8C | C1C | -           |
|     |     |     | 177.23(11) |             |     |     |     |     |             |
| N1N | C5C | C7C | N4N        | -0.96(19)   | C7C | N4N | C8C | C9C | 2.48(18)    |
| N4N | C8C | C9C | N1N        | -0.92(18)   | C8C | N4N | C7C | N3N |             |
|     |     |     | 177.62(11) |             |     |     |     |     |             |
| N4N | C8C | C9C | C4C        | 179.73(11)  | C8C | N4N | C7C | C5C | -1.56(18)   |
| C1C | C2C | C3C | C4C        | 0.4(2)      | C8C | C1C | C2C | C3C | -0.7(2)     |
| C1C | C8C | C9C | N1N        | 178.80(10)  | C9C | N1N | C5C | C6C | -           |
|     |     |     | 177.74(11) |             |     |     |     |     |             |
| C1C | C8C | C9C | C4C        | -0.56(19)   | C9C | N1N | C5C | C7C | 2.47(18)    |
| C2C | C1C | C8C | N4N        | -179.55(12) |     |     |     |     |             |

**Table 7 Hydrogen Atom Coordinates ( $\text{\AA} \times 10^4$ ) and Isotropic Displacement Parameters ( $\text{\AA}^2 \times 10^3$ ) for exp\_1179\_2NH-NH2.**

| Atom | x       | y        | z        | U(eq) |
|------|---------|----------|----------|-------|
| H3NA | 551.45  | 5696.89  | 7401.56  | 38    |
| H3NB | -30(40) | 4143(19) | 7592(10) | 30(4) |
| H1C  | 4182.55 | 647.43   | 6492.31  | 32    |
| H2C  | 7268.17 | -95.49   | 5680.85  | 38    |
| H3C  | 9707.41 | 1465.87  | 5018.02  | 39    |
| H4C  | 9139.1  | 3795.63  | 5172.94  | 33    |

#### Experimental

Single crystals of C<sub>9</sub>H<sub>6</sub>N<sub>4</sub>O<sub>2</sub> [exp\_1179\_2NH-NH2] were []. A suitable crystal was selected and [] on a XtaLAB Pro: Kappa dual offset/far diffractometer. The crystal was kept at 293(2) K during data collection. Using Olex2 [1], the structure was solved with the olex2.solve [2] structure solution program using Charge Flipping and refined with the ShelXL [3] refinement package using Least Squares minimisation.

1. Dolomanov, O.V., Bourhis, L.J., Gildea, R.J., Howard, J.A.K. & Puschmann, H. (2009), J.

Appl. Cryst. 42, 339-341.

2. Bourhis, L.J., Dolomanov, O.V., Gildea, R.J., Howard, J.A.K., Puschmann, H. (2015). Acta Cryst. A71, 59-75.

3. Sheldrick, G.M. (2015). Acta Cryst. C71, 3-8.

Crystal structure determination of [exp\_1179\_2NH-NH2]

Crystal Data for C<sub>9</sub>H<sub>6</sub>N<sub>4</sub>O<sub>2</sub> (M = 202.18 g/mol): monoclinic, space group P21/c (no. 14), a = 4.89130(10) Å, b = 9.7299(2) Å, c = 17.6911(4) Å, β = 95.712(2)°, V = 837.77(3) Å<sup>3</sup>, Z = 4, T = 293(2) K, μ(CuKα) = 1.009 mm<sup>-1</sup>, D<sub>calc</sub> = 1.603 g/cm<sup>3</sup>, 4265 reflections measured (10.05° ≤ 2θ ≤ 159.082°), 1751 unique (R<sub>int</sub> = 0.0227, R<sub>sigma</sub> = 0.0339) which were used in all calculations. The final R1 was 0.0416 (I > 2σ(I)) and wR2 was 0.1148 (all data).

Refinement model description

Number of restraints - 0, number of constraints - unknown.

Details:

1. Fixed Uiso

At 1.2 times of:

All C(H) groups

At 1.5 times of:

All N(H) groups

2.a Aromatic/amide H refined with riding coordinates:

C1C(H1C), C2C(H2C), C3C(H3C), C4C(H4C)

2.b Idealised tetrahedral OH refined as rotating group:

N3N(H3NA)

This report has been created with Olex2, compiled on 2018.05.29 svn.r3508 for OlexSys. Please let us know if there are any errors or if you would like to have additional features.

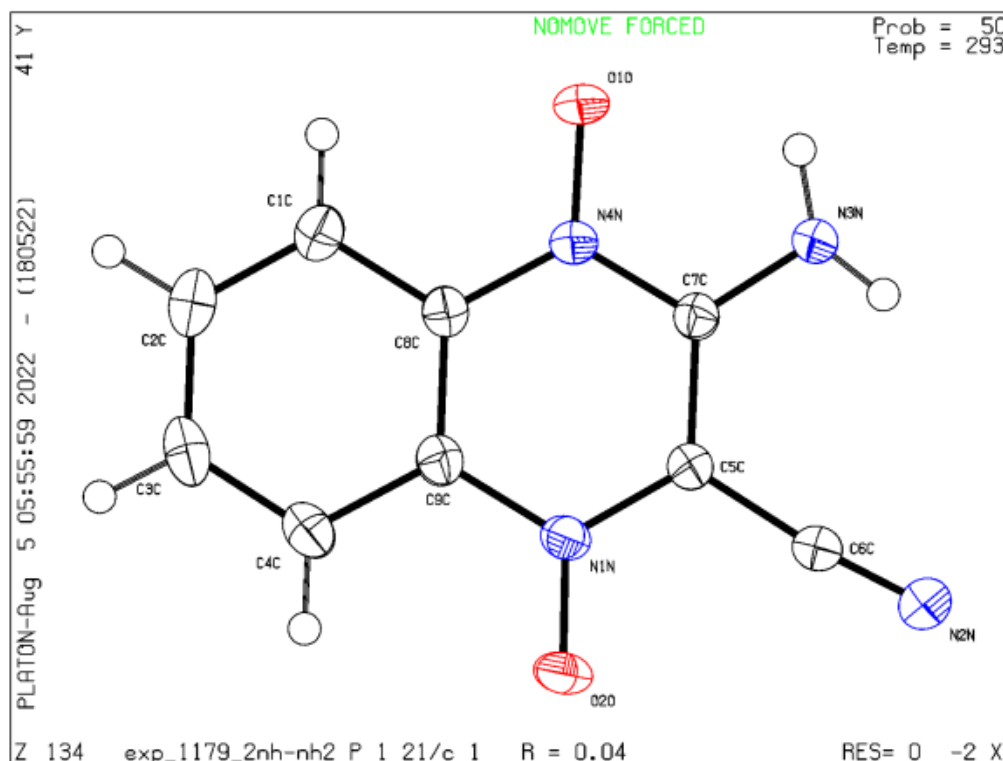

Supplement: d2dt04143j1.pdf [file d2dt04143j1.pdf]
